# Supplementary material for: Asymmetric vinylogous Michael reaction of α,β-unsaturated ketones with γ-butenolide under multifunctional catalysis
Source: Royal Society of Chemistry journal article supplement (doi:10.1039/c0cc01054e), 2010-01-01
Supplement: c0cc01054e.pdf [file c0cc01054e.pdf]

# Supporting Information

## Direct Organocatalytic Asymmetric Vinylogous Michael Reaction of $\alpha$ , $\beta$ -Unsaturated Ketones with 2(5*H*)-furanone

Huicai Huang, Feng Yu, Zhichao Jin, Wenjun Li, Wenbin Wu, Xinmiao

Liang\* and JinxingYe\*

*Engineering Research Center of Pharmaceutical Process Chemistry, Ministry of Education, School of Pharmacy, East China University of Science and Technology, 130 Meilong Road, Shanghai 200237, China.*

yejx@ecust.edu.cn, liangxm@ecust.edu.cn.

|                                                             |     |
|-------------------------------------------------------------|-----|
| A: General Information and Starting Materials               | S2  |
| B: Experimental Procedure and Characterization of Catalysts | S2  |
| C: General Procedure for Asymmetric Michael Addition        | S4  |
| D: Characterization of Michael Addition Products            | S5  |
| E: HPLC Charts of Michael Addition Products                 | S13 |
| F: NMR Spectra of Michael Addition Products                 | S40 |
| G: Absolute Configuration and X-Ray Analysis Data           | S67 |
| H: References                                               | S86 |

## A: General Information and Starting Materials

**General Information.** Proton nuclear magnetic resonance ( $^1\text{H}$  NMR) spectra and carbon nuclear magnetic resonance ( $^{13}\text{C}$  NMR) spectra were recorded on a Bruker AV-400 spectrometer (400 MHz and 100 MHz). Chemical shifts for protons are reported in parts per million downfield from tetramethylsilane and are referenced to residual protium in the NMR solvent ( $\text{CDCl}_3$ :  $\delta$  7.26). Chemical shifts for carbon are reported in parts per million downfield from tetramethylsilane and are referenced to the carbon resonances of the solvent ( $\text{CDCl}_3$ :  $\delta$  77.16). Data are represented as follows: chemical shift, integration, multiplicity (br = broad, s = singlet, d = doublet, t = triplet, q = quartet, m = multiplet), coupling constants in Hertz (Hz). Mass spectra (EI) were measured on a Waters Micromass GCT spectrometer. Optical rotations were measured on an Autopol III automatic polarimeter (Rudolph Research analytical). Melting points were measured on a XT3A apparatus. High performance liquid chromatography (HPLC) was performed on an Agilent 1200 Series chromatographs using a chiral columns (AS-H, AY-H, IA, IC) as noted.

**Starting Materials.** All solvents and inorganic reagents were from commercial sources and used without purification unless otherwise noted.

## B: Experimental Procedure and Characterization of Catalysts

General procedure for the synthesis of new chiral catalysts<sup>1</sup>.

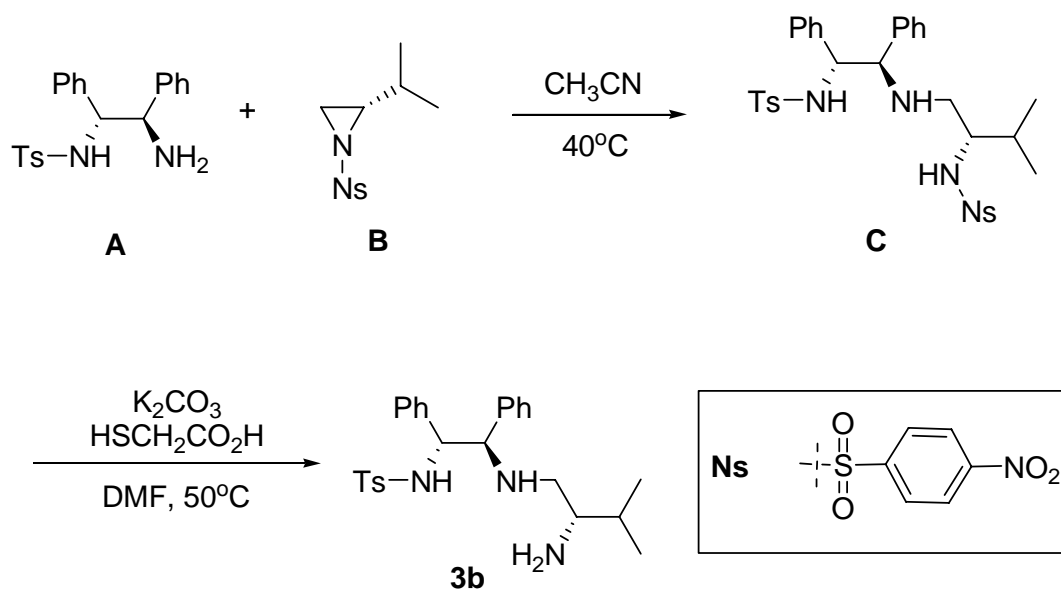

To a solution of N-Ts DPEN **A** (2.93g, 8.0mmol) in CH<sub>3</sub>CN (80.0 mL) was added **B** (2.16g, 8.0mmol). The reaction mixture was stirred at 40°C for 12h. TLC indicated the reaction was completed. The solvent was removed under reduced pressure and the residue was purified by silica gel chromatography to afford the pure product as a white solid **C** in 92% yield. <sup>1</sup>H NMR (400 MHz, CDCl<sub>3</sub>): δ (ppm) 8.18 (d, *J* = 8.8 Hz, 2H), 7.90 (d, *J* = 8.4 Hz, 2H), 7.49 (d, *J* = 8.0 Hz, 2H), 7.14-6.99 (m, 8H), 6.88-6.87 (m, 4H), 4.24 (d, *J* = 8.0 Hz, 1H), 3.58 (d, *J* = 8.0 Hz, 1H), 2.99-2.98 (m, 1H), 2.43-2.39 (m, 1H), 2.36 (s, 3H), 2.17-2.12 (m, 1H), 1.78-1.69 (m, 1H), 0.75 (d, *J* = 6.8 Hz, 3H), 0.70 (d, *J* = 6.8 Hz, 3H). <sup>13</sup>C NMR (100 MHz, CDCl<sub>3</sub>): δ (ppm) 149.6, 147.0, 143.1, 139.0, 138.2, 136.7, 129.3, 128.3, 128.2, 128.0, 127.6, 127.2, 127.1, 124.2, 68.1, 63.6, 59.7, 47.6, 29.8, 21.5, 18.8, 18.7.

To a stirred solution of **C** (3.18 g, 5.0 mmol) in DMF (30.0 mL) was added K<sub>2</sub>CO<sub>3</sub> (2.07 g, 15.0 mmol), HSCH<sub>2</sub>CO<sub>2</sub>H (0.92 g, 10.0 mmol). The mixture was stirred at 50°C until TLC indicated that the reaction was completed. The mixture was then diluted with EtOAc (50 mL), and washed with 5M NaOH (3 × 100 mL). The aqueous layer was extracted with EtOAc (3 × 30 mL) and the combined organic layers were dried over MgSO<sub>4</sub> and concentrated. The residue was purified by silica gel chromatography to afford the pure product **3b** as a white solid in 80% yield.

**3a: N-((1R,2R)-2-((S)-2-amino-3-phenylpropylamino)-1,2-diphenylethyl)-4-methylbenzenesulfonamide**

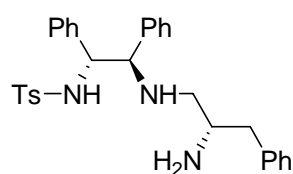

White solid. Mp 164-165°C; [ $\alpha$ ]<sub>D</sub><sup>20</sup> - 20.3 (*c* 1.0, CH<sub>2</sub>Cl<sub>2</sub>); <sup>1</sup>H NMR (400 MHz, CDCl<sub>3</sub>): δ (ppm) 7.40-7.38 (m, 2H), 7.32-7.29 (m, 2H), 7.25-7.21 (m, 1H), 7.16-7.11 (m, 5H), 7.07-7.01 (m, 5H), 6.96-6.93 (m, 4H), 4.32 (d, *J* = 8.0 Hz, 1H), 3.64 (d, *J* = 8.0 Hz, 1H), 3.03-2.98 (m, 1H), 2.72 (dd, *J* = 4.4, 13.2 Hz, 1H), 2.50 (dd, *J* = 4.0, 11.6 Hz, 1H), 2.44-2.39 (m, 1H), 2.34 (s, 3H), 2.26-2.21 (m, 1H). <sup>13</sup>C NMR (100 MHz, CDCl<sub>3</sub>): δ (ppm) 142.5, 139.6, 138.9, 138.6, 137.6, 129.2, 129.1, 128.5, 128.3, 127.8, 127.6, 127.5, 127.4, 127.1, 127.0, 126.3, 68.6, 63.4, 53.5, 52.8, 42.3, 21.4; HRMS (EI): exact mass calculated for [(M+H)<sup>+</sup>] (C<sub>30</sub>H<sub>34</sub>N<sub>3</sub>O<sub>2</sub>S) requires *m/z* 500.2372, found *m/z* 500.2374.

**3b: N-((1R,2R)-2-((S)-2-amino-3-methylbutylamino)-1,2-diphenylethyl)-4-methylbenzenesulfonamide**

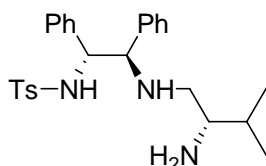

White solid. Mp 112-113°C; [ $\alpha$ ]<sub>D</sub><sup>20</sup> - 34.1 (*c* 1.0, CH<sub>2</sub>Cl<sub>2</sub>); <sup>1</sup>H NMR (400 MHz, CDCl<sub>3</sub>): δ (ppm) 7.40-7.39 (m, 2H), 7.15-7.13 (m, 3H), 7.07-7.02 (m, 5H), 6.96-6.95 (m, 4H), 4.34 (d, *J* = 8.0 Hz, 1H), 3.65 (d, *J* = 8.0 Hz, 1H), 2.50-2.44 (m, 2H), 2.34 (s, 3H), 2.18-2.13 (m, 1H), 1.55-1.51 (m, 1H), 0.83 (d, *J* = 6.8 Hz, 3H), 0.79 (d, *J* = 6.8 Hz, 3H). <sup>13</sup>C NMR (100 MHz, CDCl<sub>3</sub>): δ (ppm) 142.6, 139.6, 138.5, 137.2, 129.1, 128.3, 127.9, 127.6, 127.4, 127.2, 127.1, 68.6, 63.3, 57.0, 51.8, 31.7, 21.4, 19.5, 17.4; HRMS (EI): exact mass calculated for [(M+H)<sup>+</sup>] (C<sub>26</sub>H<sub>34</sub>N<sub>3</sub>O<sub>2</sub>S) requires *m/z* 452.2372, found *m/z* 452.2373.

**3c: *N*-((1*R*,2*R*)-2-((*S*)-2-amino-4-methylpentylamino)-1,2-diphenylethyl)-4-methylbenzenesulfonamide**

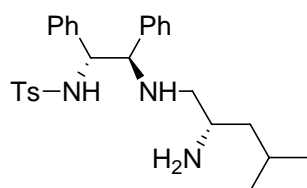

White solid. Mp 120-121°C;  $[\alpha]_D^{20}$  - 39.3 (*c* 1.0, CH<sub>2</sub>Cl<sub>2</sub>); <sup>1</sup>H NMR (400 MHz, CDCl<sub>3</sub>): δ (ppm) 7.41-7.39 (m, 2H), 7.16-7.15 (m, 3H), 7.06-7.03 (m, 5H), 6.96-6.94 (m, 4H), 4.33 (d, *J* = 8.0 Hz, 1H), 3.64 (d, *J* = 8.8 Hz, 1H), 2.80-2.74 (m, 1H), 2.45-2.41 (m, 1H), 2.35 (s, 3H), 2.15-2.10 (m, 1H), 1.66-1.60 (m, 1H), 1.13-1.09 (m, 1H), 0.88 (d, *J* = 6.8 Hz, 3H), 0.86 (d, *J* = 6.8 Hz, 3H). <sup>13</sup>C NMR (100 MHz, CDCl<sub>3</sub>): δ (ppm) 142.7, 139.6, 138.4, 137.3, 129.1, 128.3, 127.9, 127.6, 127.5, 127.4, 127.2, 127.1, 68.5, 63.3, 54.5, 49.1, 45.1, 24.6, 23.4, 22.0, 21.4; HRMS (EI): exact mass calculated for [(M+H)<sup>+</sup>] (C<sub>27</sub>H<sub>36</sub>N<sub>3</sub>O<sub>2</sub>S) requires *m/z* 466.2528, found *m/z* 466.2530.

**3d: *N*-((1*R*,2*R*)-2-((*S*)-2-amino-2-phenylethylamino)-1,2-diphenylethyl)-4-methylbenzenesulfonamide**

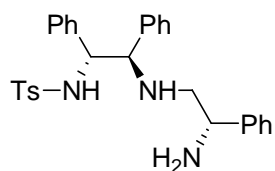

White crystals. Mp 79-80°C;  $[\alpha]_D^{20}$  - 153.7 (*c* 1.0, CH<sub>2</sub>Cl<sub>2</sub>); <sup>1</sup>H NMR (400 MHz, CDCl<sub>3</sub>): δ (ppm) 7.40-7.38 (m, 2H), 7.32-7.28 (m, 3H), 7.16-7.14 (m, 3H), 7.06-7.01 (m, 5H), 6.97-6.94 (m, 2H), 6.90-6.87 (m, 2H), 6.79-6.77 (m, 2H), 4.30 (d, *J* = 8.4 Hz, 1H), 3.42 (d, *J* = 8.4 Hz, 1H), 3.28-3.25 (m, 1H), 2.83 (dd, *J* = 4.4, 12.4 Hz, 1H), 2.71 (dd, *J* = 4.4, 12.4 Hz, 1H), 2.35 (s, 3H). <sup>13</sup>C NMR (100 MHz, CDCl<sub>3</sub>): δ (ppm) 142.7, 141.2, 139.1, 138.2, 137.1, 129.1, 128.7, 128.3, 127.8, 127.7, 127.6, 127.5, 127.4, 127.3, 127.1, 64.3, 63.5, 61.7, 48.9, 21.4; HRMS (EI): exact mass calculated for [(M+H)<sup>+</sup>] (C<sub>29</sub>H<sub>32</sub>N<sub>3</sub>O<sub>2</sub>S) requires *m/z* 486.2215, found *m/z* 486.2216.

## C: General Procedure for Asymmetric Michael Addition

To a solution of  $\alpha$ ,  $\beta$ -unsaturated ketones **5** (1.0 mmol, 2.0 equiv.) in CHCl<sub>3</sub> (1.0 mL) was added catalyst **3b** (0.05 mmol, 0.1 equiv.) and *N*-Boc-L-Phe (0.05 mmol, 0.1 equiv.) then followed by 2(*5H*)-furanone (35  $\mu$ L, 0.5 mmol, 1.0 equiv.). The reaction mixture was stirred at 50°C for 3 days and then the solvent was removed under vacuum. The residue was purified by silica gel chromatography to yield the desired addition product.

## D: Characterization of Michael Addition Products

### 6a: 5-(3-oxo-1-phenylbutyl)furan-2(5H)-one

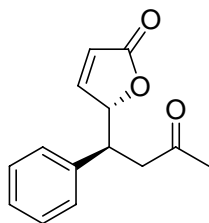

The product was obtained in 84% yield, white solid. Mp 77-78°C;  $[\alpha]_D^{20}$  - 59.5 (*c* 1.0, CH<sub>2</sub>Cl<sub>2</sub>); <sup>1</sup>H NMR (400 MHz, CDCl<sub>3</sub>): δ (ppm) 7.38-7.34 (m, 2H), 7.31-7.28 (m, 3H), 7.24-7.23 (m, 1H), 6.10 (dd, *J* = 1.2, 5.6 Hz, 1H), 5.18-5.16 (m, 1H), 3.49-3.44(m, 1H), 3.05 (dd, *J* = 5.2, 17.6 Hz, 1H), 2.93 (dd, *J* = 8.0, 17.6 Hz, 1H), 2.08 (s, 3H). <sup>13</sup>C NMR (100 MHz, CDCl<sub>3</sub>): δ (ppm) 205.9, 172.6, 155.5, 139.3, 129.0, 128.0, 127.7, 121.9, 85.7, 45.0, 44.2, 30.5; HRMS (EI): exact mass calculated for M<sup>+</sup> (C<sub>14</sub>H<sub>14</sub>O<sub>3</sub>) requires *m/z* 230.0943, found *m/z* 230.0944; The enantiomeric excess was determined by HPLC. [AY-H column, 220nm, n-Hexane: EtOH = 1:1, 0.60 mL/min]: 17.9 min (minor), 29.7 min (major), ee 98%.

### 6b: 5-(1-(2-fluorophenyl)-3-oxobutyl)furan-2(5H)-one

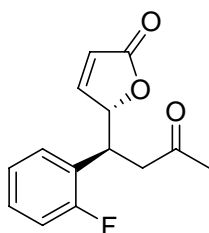

The product was obtained in 80% yield, white solid. Mp 89-91°C;  $[\alpha]_D^{20}$  - 64.2 (*c* 1.0, CH<sub>2</sub>Cl<sub>2</sub>); <sup>1</sup>H NMR (400 MHz, CDCl<sub>3</sub>): δ (ppm) 7.34-7.26 (m, 3H), 7.17-7.13 (m, 1H), 7.11-7.06 (m, 1H), 6.12 (dd, *J* = 1.2, 5.6 Hz, 1H), 5.27-5.25 (m, 1H), 3.78-3.72(m, 1H), 3.10 (dd, *J* = 5.2, 17.6 Hz, 1H), 3.00 (dd, *J* = 7.6, 18.0 Hz, 1H), 2.11 (s, 3H). <sup>13</sup>C NMR (100 MHz, CDCl<sub>3</sub>): δ (ppm) 205.6, 172.5, 161.8, 159.3, 155.4, 130.2, 130.2, 129.5, 129.4, 126.0, 125.9, 124.7, 124.7, 122.0, 116.0, 115.9, 84.4, 43.7, 38.5, 30.3; HRMS (EI): exact mass calculated for M<sup>+</sup> (C<sub>14</sub>H<sub>13</sub>FO<sub>3</sub>) requires *m/z* 248.0849, found *m/z* 248.0850; The enantiomeric excess was determined by HPLC. [AY-H column, 220nm, n-Hexane: EtOH = 7:3, 0.80 mL/min]: 24.2 min (minor), 42.9 min (major), ee 97%.

### 6c: 5-(1-(3-fluorophenyl)-3-oxobutyl)furan-2(5H)-one

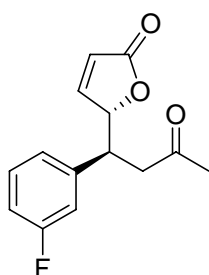

The product was obtained in 75% yield, white solid. Mp 80-82°C;  $[\alpha]_D^{20}$  - 53.1 (*c* 1.0, CH<sub>2</sub>Cl<sub>2</sub>); <sup>1</sup>H NMR (400 MHz, CDCl<sub>3</sub>): δ (ppm) 7.36-7.31 (m, 1H), 7.27 (d, *J* = 5.6 Hz, 1H), 7.11-7.09 (m, 1H), 7.04-6.09 (m, 2H), 6.14 (dd, *J* = 1.6, 5.6 Hz, 1H), 5.18-5.16 (m, 1H), 3.54-3.49(m, 1H), 3.02 (dd, *J* = 5.2, 18.0 Hz, 1H), 2.89 (dd, *J* = 8.0, 18.0 Hz, 1H), 2.11 (s, 3H). <sup>13</sup>C NMR (100 MHz, CDCl<sub>3</sub>): δ (ppm) 205.5, 172.4, 164.2, 161.7, 155.1, 142.1, 142.0, 130.6, 130.5, 123.9, 123.8, 122.2, 115.2, 115.2, 115.0, 114.8, 114.6, 85.2, 50.8, 44.5, 43.6, 30.5; HRMS (EI): exact mass calculated for M<sup>+</sup> (C<sub>14</sub>H<sub>13</sub>FO<sub>3</sub>) requires *m/z* 248.0849, found *m/z* 248.0852; The enantiomeric excess was determined by HPLC. [IA column, 220nm, n-Hexane: EtOH = 4:1, 1.0 L/min]: 12.3 min (major), 14.2 min (minor), ee 96%.

### 6d: 5-(1-(4-fluorophenyl)-3-oxobutyl)furan-2(5H)-one

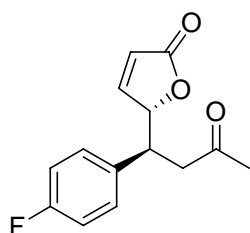

The product was obtained in 79% yield, colorless oil.  $[\alpha]_D^{20}$  - 41.8 (*c* 1.0, CH<sub>2</sub>Cl<sub>2</sub>); <sup>1</sup>H NMR (400 MHz, CDCl<sub>3</sub>): δ (ppm) 7.29-7.24 (m, 3H), 7.05-7.01 (m, 2H), 6.11 (dd, *J* = 1.6, 5.6 Hz, 1H), 5.15-5.13 (m, 1H), 3.52-3.47(m, 1H), 2.99 (dd, *J* = 5.2, 17.6 Hz, 1H), 2.87 (dd, *J* = 8.0, 18.0 Hz, 1H), 2.07 (s, 3H). <sup>13</sup>C NMR (100 MHz, CDCl<sub>3</sub>): δ (ppm) 205.7, 172.5, 163.3, 160.9, 155.2, 135.2, 135.2, 129.8, 129.7, 122.1, 115.9, 115.7, 85.5, 44.7, 43.2, 30.5; HRMS (EI): exact mass calculated for M<sup>+</sup> (C<sub>14</sub>H<sub>13</sub>FO<sub>3</sub>) requires *m/z* 248.0849, found *m/z* 248.0847; The enantiomeric excess was determined by HPLC. [AS-H column, 220nm, n-Hexane: *i*-PrOH = 1:1, 0.50 mL/min]: 37.3 min (major), 47.7 min (minor), ee 98%.

#### 6e: 5-(1-(2-chlorophenyl)-3-oxobutyl)furan-2(5H)-one

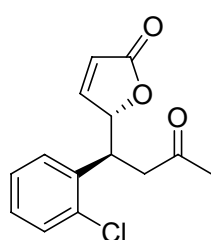

The product was obtained in 78% yield, brown oil.  $[\alpha]_D^{20}$  - 3.5 (*c* 1.0, CH<sub>2</sub>Cl<sub>2</sub>); <sup>1</sup>H NMR (400 MHz, CDCl<sub>3</sub>): δ (ppm) 7.42-7.36 (m, 2H), 7.33-7.31 (m, 1H), 7.28-7.21 (m, 2H), 6.11 (dd, *J* = 1.2, 6.0 Hz, 1H), 5.24-5.23 (m, 1H), 4.16-4.11(m, 1H), 2.98 (dd, *J* = 6.4, 17.6 Hz, 1H), 2.88 (dd, *J* = 6.8, 18.0 Hz, 1H), 2.08 (s, 3H). <sup>13</sup>C NMR (100 MHz, CDCl<sub>3</sub>): δ (ppm) 205.5, 172.6, 155.7, 137.1, 133.8, 130.1, 129.1, 128.8, 127.4, 121.8, 84.6, 43.1, 39.5, 30.2; HRMS (EI): exact mass calculated for M<sup>+</sup> (C<sub>14</sub>H<sub>13</sub>ClO<sub>3</sub>) requires *m/z* 264.0553, found *m/z* 264.0547; The enantiomeric excess was determined by HPLC. [AS-H column, 220nm, n-Hexane: *i*-PrOH = 1:1, 0.50 mL/min]: 32.2 min (minor), 57.6 min (major), ee 95%.

#### 6f: 5-(1-(3-chlorophenyl)-3-oxobutyl)furan-2(5H)-one

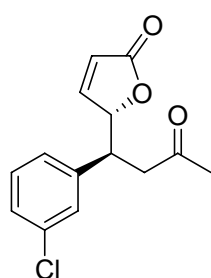

The product was obtained in 81% yield, yellow oil.  $[\alpha]_D^{20}$  - 28.4 (*c* 1.0, CH<sub>2</sub>Cl<sub>2</sub>); <sup>1</sup>H NMR (400 MHz, CDCl<sub>3</sub>): δ (ppm) 7.30-7.28 (m, 3H), 7.27-7.26 (m, 1H), 7.22-7.19 (m, 1H), 6.14 (dd, *J* = 2.0, 5.6 Hz, 1H), 5.17-5.15 (m, 1H), 3.52-3.47(m, 1H), 3.00 (dd, *J* = 5.2, 18.0 Hz, 1H), 2.89 (dd, *J* = 8.0, 18.0 Hz, 1H), 2.10 (s, 3H). <sup>13</sup>C NMR (100 MHz, CDCl<sub>3</sub>): δ (ppm) 205.4, 172.4, 155.2, 141.6, 134.7, 130.2, 128.2, 127.9, 126.5, 122.2, 85.2, 44.3, 43.5, 30.4; HRMS (EI): exact mass calculated for M<sup>+</sup> (C<sub>14</sub>H<sub>13</sub>ClO<sub>3</sub>) requires *m/z* 264.0553, found *m/z* 264.0558; The enantiomeric excess was determined by HPLC. [AY-H column, 220nm, n-Hexane: *i*-PrOH = 1:1, 0.50 mL/min]: 36.9 min (minor), 62.8 min (major), ee 97%.

#### 6g: 5-(1-(3-bromophenyl)-3-oxobutyl)furan-2(5H)-one

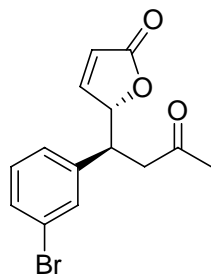

The product was obtained in 75% yield, yellow oil.  $[\alpha]_D^{20}$  - 31.2 (*c* 1.0, CH<sub>2</sub>Cl<sub>2</sub>); <sup>1</sup>H NMR (400 MHz, CDCl<sub>3</sub>): δ (ppm) 7.46-7.43 (m, 2H), 7.27-7.21 (m, 3H), 6.14 (dd, *J* = 2.0, 6.0 Hz, 1H), 5.17-5.15 (m, 1H), 3.51-3.46(m, 1H), 3.00 (dd, *J* = 5.2, 18.0 Hz, 1H), 2.88 (dd, *J* = 7.6, 18.0 Hz, 1H), 2.10 (s, 3H). <sup>13</sup>C NMR (100 MHz,

CDCl<sub>3</sub>):  $\delta$  (ppm) 205.4, 172.4, 155.1, 142.0, 131.0, 130.9, 130.5, 127.0, 122.9, 122.2, 85.2, 44.4, 43.5, 30.5; HRMS (EI): exact mass calculated for M<sup>+</sup> (C<sub>14</sub>H<sub>13</sub>BrO<sub>3</sub>) requires m/z 308.0048, found m/z 308.0054; The enantiomeric excess was determined by HPLC. [AY-H column, 220nm, n-Hexane: EtOH = 1:1, 0.60 mL/min]: 14.0 min (minor), 17.3 min (major), ee 97%.

#### 6h: 5-(1-(4-bromophenyl)-3-oxobutyl)furan-2(5H)-one

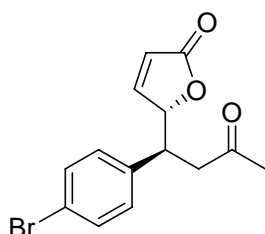

The product was obtained in 78% yield, white solid. Mp 91-92°C;  $[\alpha]_D^{20}$  - 47.5 (*c* 1.0, CH<sub>2</sub>Cl<sub>2</sub>); <sup>1</sup>H NMR (400 MHz, CDCl<sub>3</sub>):  $\delta$  (ppm) 7.44 (d, *J* = 8.4 Hz, 2H), 7.24 (d, *J* = 5.6 Hz, 1H), 7.16 (d, *J* = 8.0 Hz, 2H), 6.08 (dd, *J* = 2.0, 5.6 Hz, 1H), 5.13-5.11 (m, 1H), 3.48-3.43(m, 1H), 2.96 (dd, *J* = 5.2, 17.6 Hz, 1H), 2.85 (dd, *J* = 8.0, 18.0 Hz, 1H), 2.05 (s, 3H). <sup>13</sup>C NMR (100 MHz, CDCl<sub>3</sub>):  $\delta$  (ppm) 205.5, 172.4, 155.2, 138.5, 132.0, 129.9, 122.2, 121.6, 85.2, 44.391, 43.3, 30.5; HRMS (EI): exact mass calculated for M<sup>+</sup> (C<sub>14</sub>H<sub>13</sub>BrO<sub>3</sub>) requires m/z 308.0048, found m/z 308.0055; The enantiomeric excess was determined by HPLC. [IC column, 220nm, n-Hexane: EtOH = 4:1, 1.0 mL/min]: 18.0 min (minor), 19.8 min (major), ee 95%.

#### 6i: 5-(1-(2-methoxyphenyl)-3-oxobutyl)furan-2(5H)-one

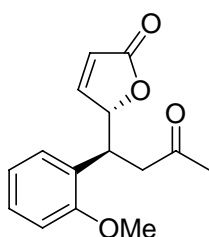

The product was obtained in 85% yield, colorless oil.  $[\alpha]_D^{20}$  - 44.9 (*c* 1.0, CH<sub>2</sub>Cl<sub>2</sub>); <sup>1</sup>H NMR (400 MHz, CDCl<sub>3</sub>):  $\delta$  (ppm) 7.28-7.24 (m, 1H), 7.22-7.21 (m, 2H), 6.95-6.89 (m, 2H), 6.05 (dd, *J* = 1.6, 5.6 Hz, 1H), 5.33-5.31 (m, 1H), 3.86(s, 3H), 3.80-3.75 (m, *J* = 5.2, 1H), 3.06-2.94 (m, 2H), 2.06 (s, 3H). <sup>13</sup>C NMR (100 MHz, CDCl<sub>3</sub>):  $\delta$  (ppm) 206.4, 172.9, 156.9, 156.4, 129.4, 128.8, 127.0, 121.2, 121.0, 111.0, 84.9, 55.4, 43.9, 39.2, 30.3; HRMS (EI): exact mass calculated for M<sup>+</sup> (C<sub>14</sub>H<sub>16</sub>O<sub>4</sub>) requires m/z 260.1049, found m/z 260.1051; The enantiomeric excess was determined by HPLC. [AS-H column, 220nm, n-Hexane: EtOH = 4:1, 0.80 mL/min]: 26.5 min (minor), 38.7 min (major), ee 98%.

#### 6j: 5-(1-(3-methoxyphenyl)-3-oxobutyl)furan-2(5H)-one

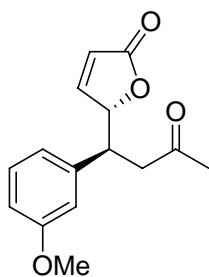

The product was obtained in 73% yield, colorless crystals. Mp 68-69°C;  $[\alpha]_D^{20}$  - 47.9 (*c* 1.0, CH<sub>2</sub>Cl<sub>2</sub>); <sup>1</sup>H NMR (400 MHz, CDCl<sub>3</sub>):  $\delta$  (ppm) 7.27-7.22 (m, 2H), 6.84 (d, *J* = 7.6 Hz 1H), 6.81-6.80 (m, 2H), 6.07 (dd, *J* = 1.2, 6.0 Hz, 1H), 5.14-5.12 (m, 1H), 3.79 (s, 3H), 3.42-3.37 (m, 1H), 3.02 (dd, *J* = 5.2, 17.6 Hz, 1H), 2.91 (dd, *J* = 8.0, 18.0 Hz, 1H), 2.06 (s, 3H). <sup>13</sup>C NMR (100 MHz, CDCl<sub>3</sub>):  $\delta$  (ppm) 205.9, 172.6, 159.8, 155.6, 140.8, 130.0, 121.8, 120.2, 114.1, 112.7, 85.6, 55.2, 45.0, 44.268, 30.5; HRMS (EI): exact mass calculated for M<sup>+</sup> (C<sub>14</sub>H<sub>16</sub>O<sub>4</sub>) requires m/z 260.1049, found m/z 260.1046; The enantiomeric excess was determined by HPLC. [AS-H column, 220nm, n-Hexane: EtOH = 7:3, 0.80 mL/min]: 19.2 min (minor), 33.4 min (major), ee 97%.

**6k: 5-(1-(4-methoxyphenyl)-3-oxobutyl)furan-2(5H)-one**

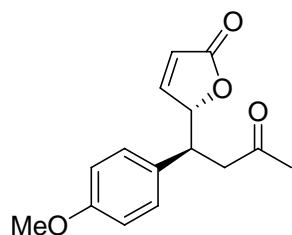

The product was obtained in 84% yield, colorless crystals. Mp 87-89°C;  $[\alpha]_D^{20}$  - 53.4 (*c* 1.0, CH<sub>2</sub>Cl<sub>2</sub>); <sup>1</sup>H NMR (400 MHz, CDCl<sub>3</sub>): δ (ppm) 7.22 (d, *J* = 5.6 Hz, 1H), 7.17 (d, *J* = 8.8 Hz 2H), 6.84 (d, *J* = 8.8 Hz 2H), 6.05 (dd, *J* = 1.6, 5.6 Hz, 1H), 5.11-5.09 (m, 1H), 3.76 (s, 3H), 3.40-3.35 (m, 1H), 2.98 (dd, *J* = 5.2, 17.2 Hz, 1H), 2.87 (dd, *J* = 8.4, 17.2 Hz, 1H), 2.03 (s, 3H). <sup>13</sup>C NMR (100 MHz, CDCl<sub>3</sub>): δ (ppm) 206.1, 172.7, 158.9, 155.6, 131.1, 129.1, 121.8, 114.2, 85.9, 55.2, 45.2, 43.5, 30.5; HRMS (EI): exact mass calculated for M<sup>+</sup> (C<sub>14</sub>H<sub>16</sub>O<sub>4</sub>) requires *m/z* 260.1049, found *m/z* 260.1052; The enantiomeric excess was determined by HPLC. [IC column, 220nm, n-Hexane: EtOH = 4:1, 1.0 mL/min]: 33.8 min (minor), 37.9 min (major), ee 96%.

**6l: 5-(3-oxo-1-*m*-tolylbutyl)furan-2(5H)-one**

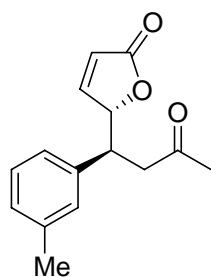

The product was obtained in 83% yield, yellow oil.  $[\alpha]_D^{20}$  - 26.2 (*c* 1.0, CH<sub>2</sub>Cl<sub>2</sub>); <sup>1</sup>H NMR (400 MHz, CDCl<sub>3</sub>): δ (ppm) 7.23-7.20 (m, 2H), 7.09-7.05 (m, 3H), 6.07 (dd, *J* = 1.6, 5.6 Hz, 1H), 5.14-5.13 (m, 1H), 3.42-3.37 (m, 1H), 3.02 (dd, *J* = 5.2, 17.6 Hz, 1H), 2.91 (dd, *J* = 8.4, 17.6 Hz, 1H), 2.34 (s, 3H), 2.06 (s, 3H). <sup>13</sup>C NMR (100 MHz, CDCl<sub>3</sub>): δ (ppm) 205.9, 172.6, 155.7, 139.2, 138.5, 128.8, 128.4, 125.0, 121.7, 85.8, 45.0, 44.2, 30.5, 21.4; HRMS (EI): exact mass calculated for M<sup>+</sup> (C<sub>15</sub>H<sub>16</sub>O<sub>3</sub>) requires *m/z* 244.1099, found *m/z* 244.1100; The enantiomeric excess was determined by HPLC. [AY-H column, 220nm, n-Hexane: EtOH = 1:1, 0.60 mL/min]: 19.7 min (minor), 23.7 min (major), ee 97%.

**6m: 5-(3-oxo-1-*p*-tolylbutyl)furan-2(5H)-one**

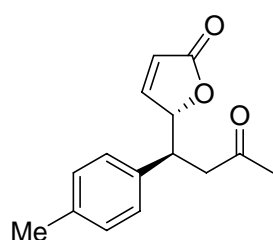

The product was obtained in 85% yield, yellow oil.  $[\alpha]_D^{20}$  - 48.1 (*c* 1.0, CH<sub>2</sub>Cl<sub>2</sub>); <sup>1</sup>H NMR (400 MHz, CDCl<sub>3</sub>): δ (ppm) 7.23 (d, *J* = 5.6 Hz, 1H), 7.16-7.15 (m, 4H), 6.09 (dd, *J* = 1.2, 5.6 Hz, 1H), 5.14-5.12 (m, 1H), 3.43-3.38 (m, 1H), 3.03 (dd, *J* = 5.2, 17.6 Hz, 1H), 2.91 (dd, *J* = 8.0, 17.6 Hz, 1H), 2.34 (s, 3H), 2.07 (s, 3H). <sup>13</sup>C NMR (100 MHz, CDCl<sub>3</sub>): δ (ppm) 206.0, 172.7, 155.6, 137.4, 136.1, 129.6, 127.9, 121.8, 85.8, 45.2, 44.0, 30.5, 21.0; HRMS (EI): exact mass calculated for M<sup>+</sup> (C<sub>15</sub>H<sub>16</sub>O<sub>3</sub>) requires *m/z* 244.1099, found *m/z* 244.1098; The enantiomeric excess was determined by HPLC. [IC column, 220nm, n-Hexane: EtOH = 4:1, 1.0 mL/min]: 24.2 min (minor), 27.6 min (major), ee 96%.

**6n: 5-(1-(2,3-dimethoxyphenyl)-3-oxobutyl)furan-2(5H)-one**

The product was obtained in 86% yield, yellow oil.  $[\alpha]_D^{20}$  - 49.9 (*c* 1.0, CH<sub>2</sub>Cl<sub>2</sub>); <sup>1</sup>H NMR (400 MHz, CDCl<sub>3</sub>): δ (ppm) 7.23 (d, *J* = 5.6 Hz, 1H) 7.07-7.03 (m, 1H),



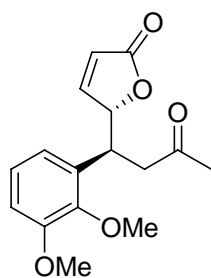

6.88-6.83 (m, 2H), 6.07 (dd,  $J = 1.6, 5.6$  Hz, 1H), 5.14-5.12 (m, 1H), 3.92 (s, 3H), 3.88 (s, 3H), 3.86-3.82 (m, 1H), 3.07 (dd,  $J = 5.2, 17.6$  Hz, 1H), 2.99 (dd,  $J = 8.4, 17.6$  Hz, 1H), 2.10 (s, 3H).  $^{13}\text{C}$  NMR (100 MHz,  $\text{CDCl}_3$ ):  $\delta$  (ppm) 206.1, 172.8, 156.1, 153.0, 146.8, 132.6, 124.3, 121.4, 119.8, 111.7, 85.4, 60.7, 55.7, 44.4, 38.0, 30.4; HRMS (EI): exact mass calculated for  $\text{M}^+$  ( $\text{C}_{16}\text{H}_{18}\text{O}_5$ ) requires  $m/z$  290.1154, found  $m/z$  290.1153; The enantiomeric excess was determined by HPLC. [AY-H column, 220nm, n-Hexane: EtOH = 1:1, 0.60 mL/min]: 38.2 min (major), 56.1 min (minor), ee 97%.

**6o: 5-(1-(2,4-dimethoxyphenyl)-3-oxobutyl)furan-2(5H)-one**

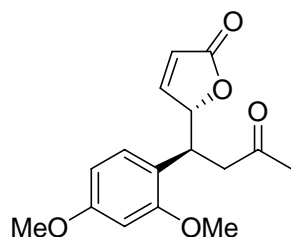

The product was obtained in 85% yield, yellow oil.  $[\alpha]_{\text{D}}^{20} - 48.0$  ( $c$  1.0,  $\text{CH}_2\text{Cl}_2$ );  $^1\text{H}$  NMR (400 MHz,  $\text{CDCl}_3$ ):  $\delta$  (ppm) 7.22 (d,  $J = 6.0$  Hz, 1H), 7.12-7.10 (m, 1H), 6.47-6.45 (m, 2H), 6.04 (dd,  $J = 1.2, 5.6$  Hz, 1H), 5.29-5.27 (m, 1H), 3.83 (s, 3H), 3.79 (s, 3H), 3.69-3.64 (m, 1H), 3.04-2.92 (m, 2H), 2.06 (s, 3H).  $^{13}\text{C}$  NMR (100 MHz,  $\text{CDCl}_3$ ):  $\delta$  (ppm) 206.6, 172.9, 160.2, 157.9, 156.5, 130.0, 121.0, 119.1, 104.6, 98.8, 85.1, 55.4, 55.2, 44.2, 39.0, 30.2; HRMS (EI): exact mass calculated for  $\text{M}^+$  ( $\text{C}_{16}\text{H}_{18}\text{O}_5$ ) requires  $m/z$  290.1154, found  $m/z$  290.1157; The enantiomeric excess was determined by HPLC. [IA column, 220nm, n-Hexane: EtOH = 8:1, 1.0 mL/min]: 17.5 min (minor), 18.6 min (major), ee 98%.

**6p: 5-(1-(naphthalen-2-yl)-3-oxobutyl)furan-2(5H)-one**

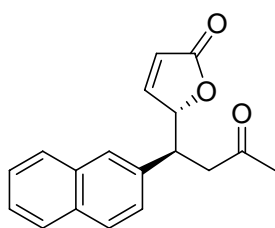

The product was obtained in 86% yield, white solid. Mp 123-124°C;  $[\alpha]_{\text{D}}^{20} - 59.8$  ( $c$  1.0,  $\text{CH}_2\text{Cl}_2$ );  $^1\text{H}$  NMR (400 MHz,  $\text{CDCl}_3$ ):  $\delta$  (ppm) 7.87-7.83 (m, 3H), 7.77-7.76 (m, 1H), 7.54-7.48 (m, 2H), 7.44-7.41 (m, 1H), 7.25-7.24 (m, 1H), 6.11 (dd,  $J = 1.6, 6.0$  Hz, 1H), 5.28-5.26 (m, 1H), 3.67-3.61 (m, 1H), 3.13 (dd,  $J = 5.2, 17.6$  Hz, 1H), 3.04 (dd,  $J = 8.0, 17.6$  Hz, 1H), 2.09 (s, 3H).  $^{13}\text{C}$  NMR (100 MHz,  $\text{CDCl}_3$ ):  $\delta$  (ppm) 205.9, 172.6, 155.5, 136.9, 133.4, 132.8, 128.8, 127.8, 127.7, 127.0, 126.5, 126.2, 126.0, 122.0, 85.7, 45.1, 44.3, 30.5; HRMS (EI): exact mass calculated for  $\text{M}^+$  ( $\text{C}_{18}\text{H}_{16}\text{O}_3$ ) requires  $m/z$  280.1099, found  $m/z$  280.1096; The enantiomeric excess was determined by HPLC. [IA column, 220nm, n-Hexane: EtOH = 4:1, 1.0 mL/min]: 15.5 min (maior), 20.1 min (minor), ee 98%.

**6q: 5-(1-(furan-2-yl)-3-oxobutyl)furan-2(5H)-one**

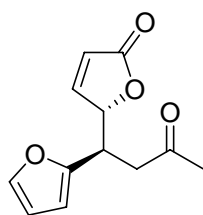

The product was obtained in 79% yield, colorless oil.  $[\alpha]_{\text{D}}^{20} - 105.8$  ( $c$  1.0,  $\text{CH}_2\text{Cl}_2$ );  $^1\text{H}$  NMR (400 MHz,  $\text{CDCl}_3$ ):  $\delta$  (ppm) 7.36-7.34 (m, 2H), 6.32-6.31 (m, 1H), 6.19-6.18 (m, 1H), 6.10 (dd,  $J = 1.6, 5.6$  Hz, 1H), 5.23-5.22 (m, 1H), 3.66-3.61 (m, 1H), 3.02-2.89 (m, 2H), 2.13 (s, 3H).  $^{13}\text{C}$  NMR (100 MHz,  $\text{CDCl}_3$ ):  $\delta$  (ppm) 205.4, 172.4, 155.1, 152.0, 142.0, 121.9, 110.5, 107.5, 83.7, 42.5, 37.7,

30.2; HRMS (EI): exact mass calculated for  $M^+$  ( $C_{12}H_{12}O_4$ ) requires  $m/z$  220.0736, found  $m/z$  220.0737; The enantiomeric excess was determined by HPLC. [AY-H column, 220nm, n-Hexane: EtOH = 1:1, 0.60 mL/min]: 23.4 min (minor), 27.4 min (major), ee 97%.

**6r: 5-(3-oxo-1-(thiophen-2-yl)butyl)furan-2(5H)-one**

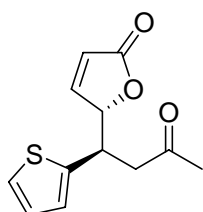

The product was obtained in 83% yield, brown solid. Mp 60-61°C;  $[\alpha]_D^{20}$  - 73.6 (*c* 1.0,  $CH_2Cl_2$ );  $^1H$  NMR (400 MHz,  $CDCl_3$ ):  $\delta$  (ppm) 7.32 (dd,  $J$  = 0.8, 6.0 Hz, 1H), 7.22-7.21 (m, 1H), 6.97-6.96 (m, 2H), 6.11 (dd,  $J$  = 1.6, 5.6 Hz, 1H), 5.20-5.18 (m, 1H), 3.84-3.79 (m, 1H), 3.05-2.90 (m, 2H), 2.11 (s, 3H).  $^{13}C$  NMR (100 MHz,  $CDCl_3$ ):  $\delta$  (ppm) 205.4, 172.3, 155.0, 141.6, 127.1, 126.0, 124.7, 122.2, 85.2, 45.9, 39.4, 30.5; HRMS (EI): exact mass calculated for  $M^+$  ( $C_{12}H_{12}O_3S$ ) requires  $m/z$  236.0507, found  $m/z$  236.0506; The enantiomeric excess was determined by HPLC. [IA column, 220nm, n-Hexane: EtOH = 4:1, 1.0 mL/min]: 15.1 min (major), 45.3 min (minor), ee 98%.

**6s: 5-(3-oxo-1,3-diphenylpropyl)furan-2(5H)-one**

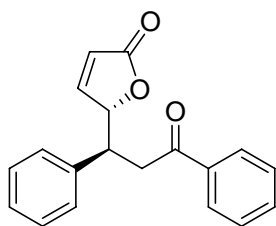

The product was obtained in 79% yield, white solid. Mp 83-85°C;  $[\alpha]_D^{20}$  - 52.4 (*c* 1.0,  $CH_2Cl_2$ );  $^1H$  NMR (400 MHz,  $CDCl_3$ ):  $\delta$  (ppm) 7.91-7.89 (m, 2H), 7.58-7.54 (m, 1H), 7.46-7.43 (m, 2H), 7.36-7.33 (m, 4H), 7.30-7.24 (m, 2H), 6.10-6.09 (m, 1H), 5.30-5.28 (m, 1H), 3.75-3.8270 (m, 1H), 3.59 (dd,  $J$  = 5.2, 17.6 Hz, 1H), 3.50 (dd,  $J$  = 7.6, 17.6 Hz, 1H).  $^{13}C$  NMR (100 MHz,  $CDCl_3$ ):  $\delta$  (ppm) 197.4, 172.7, 155.7, 139.6, 136.6, 133.4, 128.9, 128.7, 128.7, 128.4, 128.2, 128.1, 128.0, 127.7, 122.0, 85.8, 44.4, 40.1; HRMS (EI): exact mass calculated for  $M^+$  ( $C_{19}H_{16}O_3$ ) requires  $m/z$  292.1099, found  $m/z$  292.1101; The enantiomeric excess was determined by HPLC. [IC column, 220nm, n-Hexane: EtOH = 4:1, 1.0 mL/min]: 16.8 min (minor), 19.2 min (major), ee 97%.

**6t: 5-(2-oxoheptan-4-yl)furan-2(5H)-one**

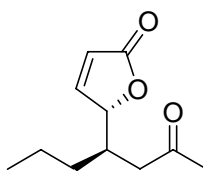

The product was obtained in 75% yield, yellow oil.  $[\alpha]_D^{20}$  - 119.1 (*c* 1.0,  $CH_2Cl_2$ );  $^1H$  NMR (400 MHz,  $CDCl_3$ ):  $\delta$  (ppm) 7.42 (dd,  $J$  = 1.6, 5.6 Hz, 1H), 6.10 (dd,  $J$  = 2.0, 5.6 Hz, 1H), 5.16-5.15 (m, 1H), 2.51-2.47 (m, 1H), 2.35-2.33 (m, 2H), 2.11 (s, 3H), 1.58-1.53 (m, 1H), 1.43-1.38 (m, 3H), 0.97-0.93 (m, 3H).  $^{13}C$  NMR (100 MHz,  $CDCl_3$ ):  $\delta$  (ppm) 207.2, 173.0, 156.2, 121.5, 84.7, 41.9, 35.7, 34.0, 30.4, 20.2, 14.0; HRMS (EI): exact mass calculated for  $M^+$  ( $C_{11}H_{16}O_3$ ) requires  $m/z$  196.1099, found  $m/z$  196.1100; The enantiomeric excess was determined by HPLC. [AS-H column, 205nm, n-Hexane: EtOH = 8:1, 1.0 mL/min]: 15.0 min (minor), 32.2 min (major), ee 98%.

**6u: 5-(2-oxooctan-4-yl)furan-2(5H)-one**

The product was obtained in 74% yield, yellow oil.  $[\alpha]_D^{20}$  - 128.0 (*c* 1.0,  $CH_2Cl_2$ );  $^1H$

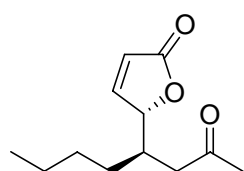

NMR (400 MHz, CDCl<sub>3</sub>):  $\delta$  (ppm) 7.42 (dd,  $J = 1.2, 5.6$  Hz, 1H), 6.10 (dd,  $J = 1.6, 5.6$  Hz, 1H), 5.16-5.15 (m, 1H), 2.51-2.43 (m, 1H), 2.35-2.34 (m, 2H), 2.11 (s, 3H), 1.60-1.56 (m, 1H) 1.44-1.31 (m, 5H), 0.94-0.91 (m, 3H). <sup>13</sup>C NMR (100 MHz, CDCl<sub>3</sub>):  $\delta$  (ppm) 207.2, 173.1, 156.2, 121.6, 84.8, 42.0, 35.9, 31.6, 30.5, 29.2, 22.6, 14.0; HRMS (EI): exact mass calculated for M<sup>+</sup> (C<sub>12</sub>H<sub>18</sub>O<sub>3</sub>) requires m/z 210.1056, found m/z 210.1259; The enantiomeric excess was determined by HPLC. [AS-H column, 205nm, n-Hexane: EtOH = 8:1, 1.0 mL/min]: 12.6min (minor), 18.8 min (major), ee 96%.

#### 6v: 5-(2-oxononan-4-yl)furan-2(5H)-one

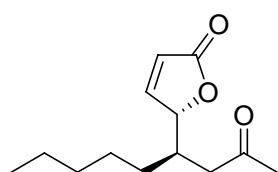

The product was obtained in 82% yield, yellow oil.  $[\alpha]_D^{20} - 82.4$  (*c* 1.0, CH<sub>2</sub>Cl<sub>2</sub>); <sup>1</sup>H NMR (400 MHz, CDCl<sub>3</sub>):  $\delta$  (ppm) 7.41 (dd,  $J = 1.6, 5.6$  Hz, 1H), 6.09 (dd,  $J = 2.0, 5.6$  Hz, 1H), 5.16-5.15 (m, 1H), 2.50-2.43 (m, 1H), 2.34-2.33 (m, 2H), 2.11 (s, 3H), 1.60-1.52 (m, 1H) 1.43-1.31 (m, 7H), 0.92-0.88 (m, 3H). <sup>13</sup>C NMR (100 MHz, CDCl<sub>3</sub>):  $\delta$  (ppm) 207.1, 173.0, 156.2, 121.5, 84.7, 41.9, 35.9, 31.7, 31.7, 30.4, 26.7, 22.4, 13.9; HRMS (EI): exact mass calculated for M<sup>+</sup> (C<sub>13</sub>H<sub>20</sub>O<sub>3</sub>) requires m/z 224.1412, found m/z 224.1415; The enantiomeric excess was determined by HPLC. [AS-H column, 205nm, n-Hexane: EtOH = 8:1, 1.0mL/min]: 11.6min (minor), 15.7 min (major), ee 97%.

#### 6w: 5-(2-oxodecan-4-yl)furan-2(5H)-one

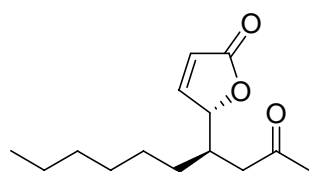

The product was obtained in 78% yield, yellow oil.  $[\alpha]_D^{20} - 81.0$  (*c* 1.0, CH<sub>2</sub>Cl<sub>2</sub>); <sup>1</sup>H NMR (400 MHz, CDCl<sub>3</sub>):  $\delta$  (ppm) 7.41 (dd,  $J = 1.6, 5.6$  Hz, 1H), 6.09 (dd,  $J = 2.0, 5.6$  Hz, 1H), 5.16-5.15 (m, 1H), 2.48-2.43 (m, 1H), 2.34-2.33 (m, 2H), 2.11 (s, 3H), 1.61-1.52 (m, 1H) 1.42-1.3129 (m, 9H), 0.91-0.88 (m, 3H). <sup>13</sup>C NMR (100 MHz, CDCl<sub>3</sub>):  $\delta$  (ppm) 207.2, 173.0, 156.2, 121.5, 84.7, 41.9, 35.9, 31.8, 31.6, 30.4, 29.2, 27.0, 22.5, 14.0; HRMS (EI): exact mass calculated for M<sup>+</sup> (C<sub>14</sub>H<sub>22</sub>O<sub>3</sub>) requires m/z 238.1569, found m/z 238.1572; The enantiomeric excess was determined by HPLC. [AS-H column, 205nm, n-Hexane: EtOH = 8:1, 1.0 mL/min]: 10.1min (minor), 13.8 min (major), ee 97%.

#### 6x: 5-(4-oxooctan-2-yl)furan-2(5H)-one

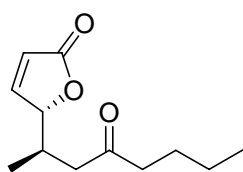

The product was obtained in 65% yield, yellow oil.  $[\alpha]_D^{20} - 85.6$  (*c* 1.0, CH<sub>2</sub>Cl<sub>2</sub>); <sup>1</sup>H NMR (400 MHz, CDCl<sub>3</sub>):  $\delta$  (ppm) 7.45 (dd,  $J = 1.6, 5.6$  Hz, 1H), 6.12 (dd,  $J = 2.0, 5.6$  Hz, 1H), 4.99-4.98 (m, 1H), 2.53-2.47 (m, 2H) 2.39-2.30 (m, 3H) 1.58-1.50 (m, 2H), 1.33-1.26 (m, 2H), 1.11-1.10 (m, 3H), 0.93-0.89 (t, 3H). <sup>13</sup>C NMR (100 MHz, CDCl<sub>3</sub>):  $\delta$  (ppm) 209.3, 172.8, 155.4, 121.9, 86.5, 43.6, 43.1, 31.9, 25.8, 22.2, 16.8, 13.8; HRMS(EI): exact mass calculated for M<sup>+</sup> (C<sub>12</sub>H<sub>18</sub>O<sub>3</sub>) requires m/z 210.1256, found m/z 210.1257; The enantiomeric excess was determined by HPLC. [IC column, 205nm, n-Hexane: EtOH = 4:1, 1.0 mL/min]:

14.5 min (major), 15.7 min (minor), ee 99%.

**6y: 5-(5-oxo-1-phenylhexan-3-yl)furan-2(5H)-one**

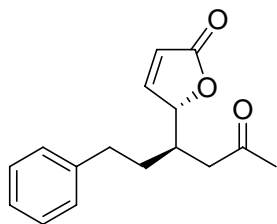

The product was obtained in 76% yield, yellow oil.  $[\alpha]_D^{20}$  - 57.8 (*c* 1.0, CH<sub>2</sub>Cl<sub>2</sub>); <sup>1</sup>H NMR (400 MHz, CDCl<sub>3</sub>): δ (ppm) 7.39 (dd, *J* = 1.2, 5.6 Hz, 1H), 7.33-7.30 (m, 2H), 7.24-7.19 (m, 3H), 6.10 (dd, *J* = 2.0, 6.0 Hz, 1H), 5.20-5.19 (m, 1H), 2.79-2.66 (m, 2H), 2.59-2.52 (m, 1H), 2.38-2.37 (m, 2H), 2.10 (s, 3H), 1.97-1.87 (m, 1H), 1.82-1.73 (m, 1H). <sup>13</sup>C NMR (100 MHz, CDCl<sub>3</sub>): δ (ppm) 206.9, 173.0, 156.1, 141.1, 128.6, 128.3, 126.2, 121.7, 84.6, 41.8, 35.5, 33.5, 33.4, 30.4; HRMS (EI): exact mass calculated for M<sup>+</sup> (C<sub>16</sub>H<sub>18</sub>O<sub>3</sub>) requires *m/z* 258.1256, found *m/z* 258.1255; The enantiomeric excess was determined by HPLC. [AY-H column, 220nm, n-Hexane: EtOH = 1:1, 0.60 mL/min]: 14.2min (minor), 15.4 min (major), ee 97%.

**7a: 5-(3-oxocyclopentyl)furan-2(5H)-one**

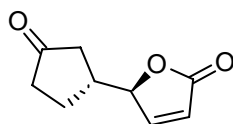

The product was obtained in 51% yield, yellow oil.  $[\alpha]_D^{20}$  - 75.3 (*c* 1.0, CH<sub>2</sub>Cl<sub>2</sub>); <sup>1</sup>H NMR (400 MHz, CDCl<sub>3</sub>): δ (ppm) 7.50-7.46 (m, 1H), 6.18-6.16 (m, 1H), 5.08-5.07 (m, 1H), 2.55-2.49 (m, 1H), 2.38-2.29 (m, 2H), 2.22-2.15 (m, 2H), 1.98-1.91 (m, 2H), 1.76-1.66 (m, 1H). <sup>13</sup>C NMR (100 MHz, CDCl<sub>3</sub>): δ (ppm) 216.4, 172.5, 154.7, 122.6, 122.4, 84.9, 84.6, 40.4, 39.4, 39.2, 37.8, 37.7, 25.4, 24.1; HRMS (EI): exact mass calculated for M<sup>+</sup> (C<sub>9</sub>H<sub>10</sub>O<sub>3</sub>) requires *m/z* 166.0630, found *m/z* 166.0632; The enantiomeric excess was determined by HPLC. [IC column, 205nm, n-Hexane: EtOH = 1:1, 1.0 mL/min]: 19.2min (major), 21.2 min (minor), ee 97%.

**7b: 5-(3-oxocycloheptyl)furan-2(5H)-one**

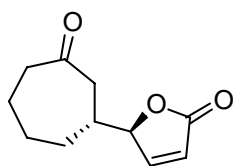

The product was obtained in 67% yield, yellow oil.  $[\alpha]_D^{20}$  - 69.9 (*c* 1.0, CH<sub>2</sub>Cl<sub>2</sub>); <sup>1</sup>H NMR (400 MHz, CDCl<sub>3</sub>): δ (ppm) 7.48-7.45 (m, 1H), 6.148-6.16 (m, 1H), 5.06-5.07 (m, 1H), 2.51-2.49 (m, 1H), 2.40-2.26 (m, 3H), 2.22-2.10 (m, 4H), 1.95-1.88 (m, 2H), 1.70-1.65 (m, 1H). <sup>13</sup>C NMR (100 MHz, CDCl<sub>3</sub>): δ (ppm) 216.5, 216.4, 172.6, 154.7, 122.5, 122.4, 84.9, 84.7, 40.4, 39.3, 39.2, 37.8, 37.7, 25.4, 24.1; HRMS (EI): exact mass calculated for M<sup>+</sup> (C<sub>11</sub>H<sub>14</sub>O<sub>3</sub>) requires *m/z* 194.0943, found *m/z* 194.0946; The enantiomeric excess was determined by HPLC. [IC column, 205nm, n-Hexane: EtOH = 1:1, 1.0 mL/min]: 22.7min (major), 25.6 min (minor), ee 97%.

## E: HPLC Charts of Michael Addition Products

### 6a: 5-(3-oxo-1-phenylbutyl)furan-2(5H)-one

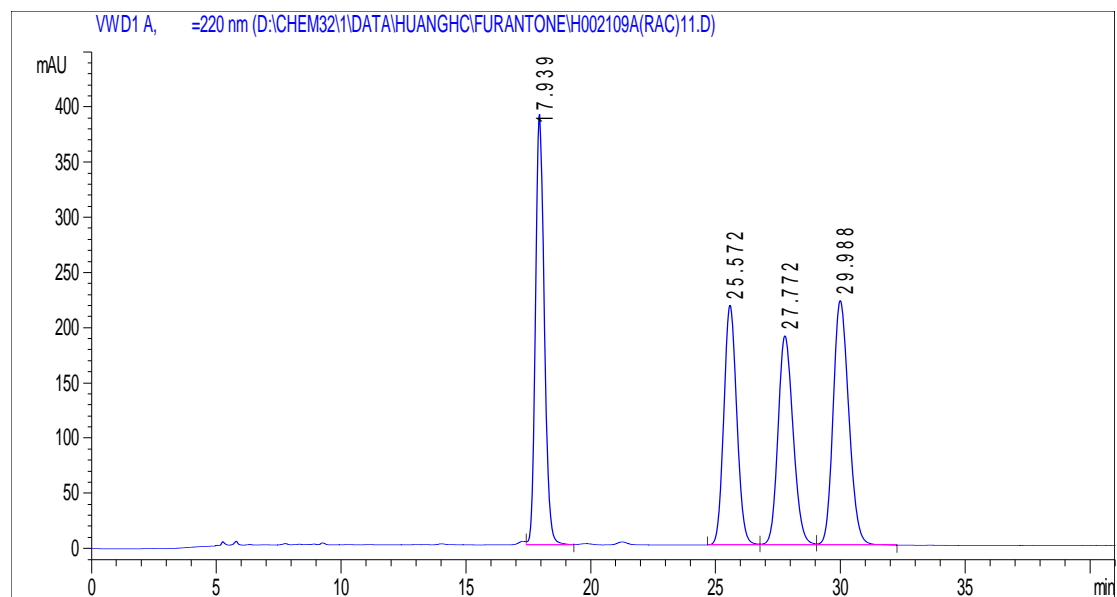

| # | Time   | Area   | Height | Width  | Symmetry | Area % |
|---|--------|--------|--------|--------|----------|--------|
| 1 | 17.939 | 9578.3 | 390.1  | 0.3796 | 0.787    | 27.323 |
| 2 | 25.572 | 7837.6 | 217.3  | 0.5607 | 0.874    | 22.358 |
| 3 | 27.772 | 7977.3 | 189.6  | 0.6539 | 0.805    | 22.756 |
| 4 | 29.988 | 9662.2 | 221.6  | 0.6805 | 0.787    | 27.563 |

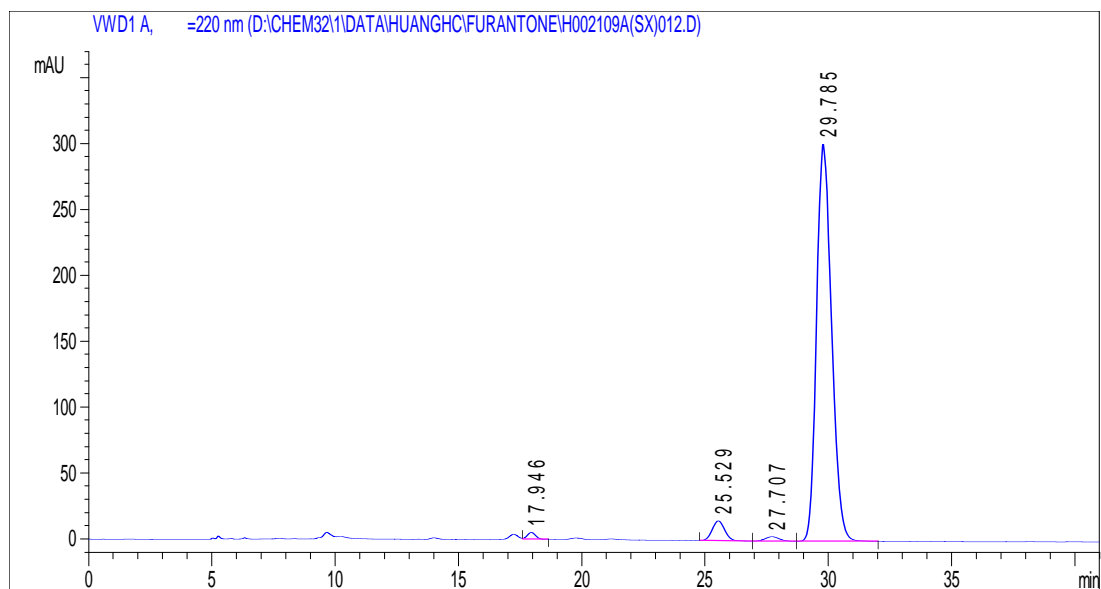

| # | Time   | Area  | Height | Width  | Symmetry | Area % |
|---|--------|-------|--------|--------|----------|--------|
| 1 | 17.946 | 131.3 | 5.3    | 0.3802 | 0.917    | 0.966  |
| 2 | 25.529 | 535.3 | 15.1   | 0.5499 | 0.916    | 3.937  |
| 3 | 27.707 | 133.3 | 3.4    | 0.6251 | 0.894    | 0.980  |
| 4 | 29.785 | 12796 | 301.3  | 0.6586 | 0.759    | 94.117 |

**6b: 5-(1-(2-fluorophenyl)-3-oxobutyl)furan-2(5H)-one**

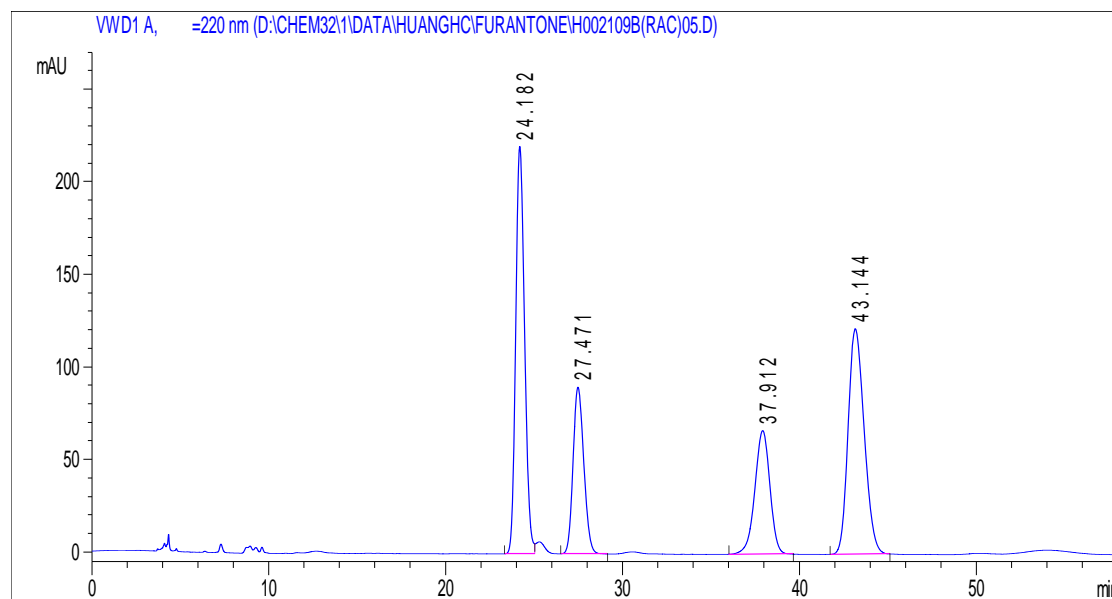

| # | Time   | Area   | Height | Width  | Symmetry | Area % |
|---|--------|--------|--------|--------|----------|--------|
| 1 | 24.182 | 7669.4 | 220.2  | 0.5404 | 0.807    | 33.165 |
| 2 | 27.471 | 3803.1 | 90.1   | 0.6583 | 0.804    | 16.446 |
| 3 | 37.912 | 3957.5 | 66.8   | 0.915  | 1.067    | 17.114 |
| 4 | 43.144 | 7695   | 121.9  | 0.9871 | 0.768    | 33.276 |

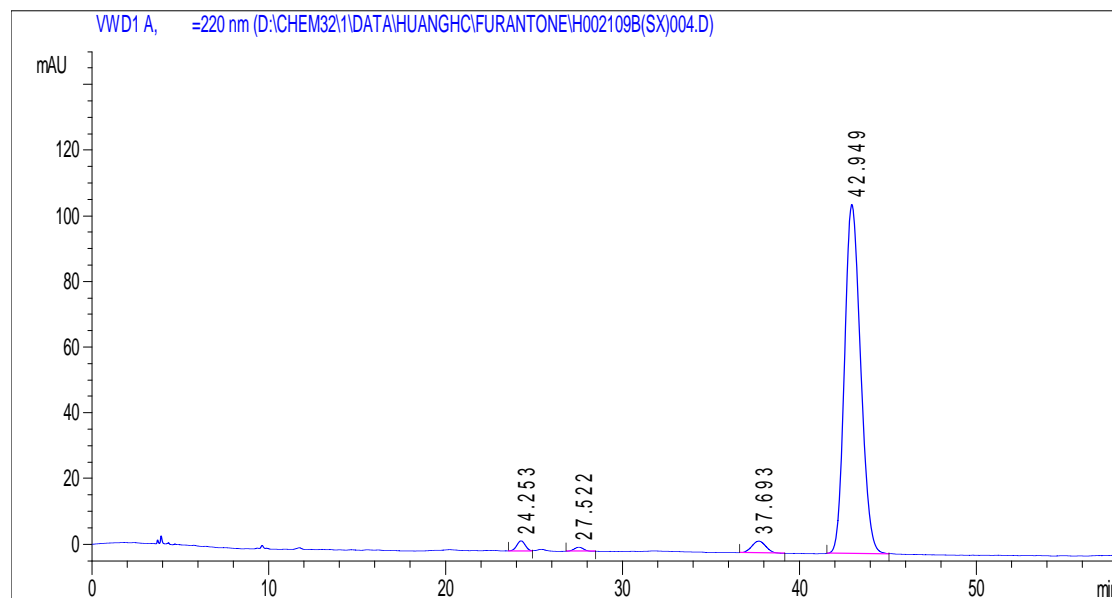

| # | Time   | Area   | Height | Width  | Symmetry | Area % |
|---|--------|--------|--------|--------|----------|--------|
| 1 | 24.253 | 105.4  | 3.1    | 0.5317 | 0.96     | 1.491  |
| 2 | 27.522 | 48.5   | 1.3    | 0.5631 | 0.939    | 0.686  |
| 3 | 37.693 | 200.3  | 3.6    | 0.8183 | 0.958    | 2.833  |
| 4 | 42.949 | 6716.2 | 106.3  | 0.9843 | 0.788    | 94.990 |

**6c: 5-(1-(3-fluorophenyl)-3-oxobutyl)furan-2(5H)-one**

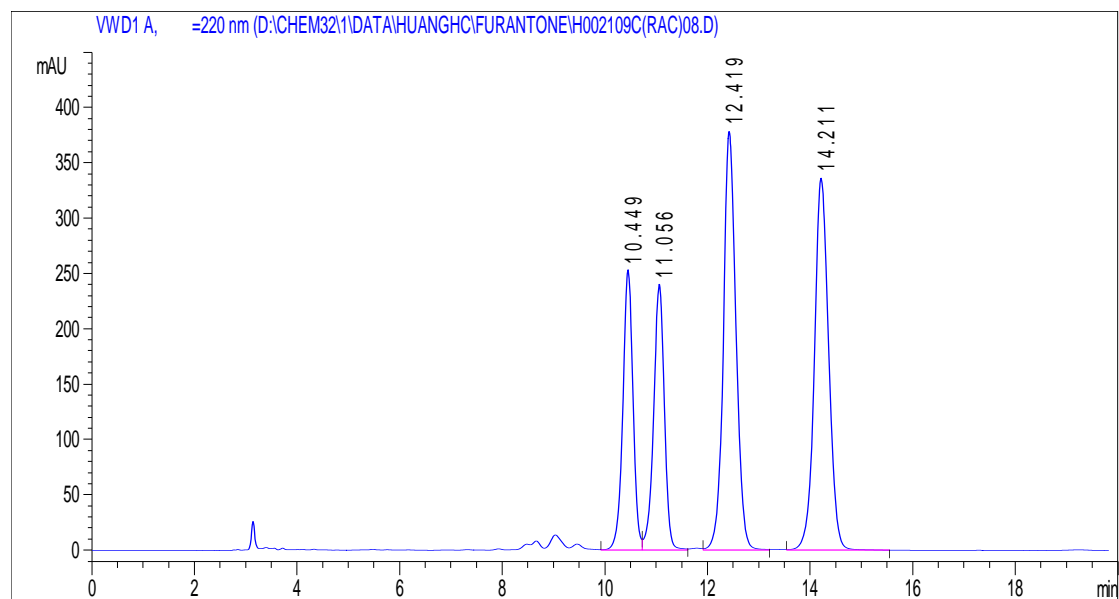

| # | Time   | Area   | Height | Width  | Symmetry | Area % |
|---|--------|--------|--------|--------|----------|--------|
| 1 | 10.449 | 3502.8 | 253.4  | 0.2137 | 1.038    | 17.523 |
| 2 | 11.056 | 3505.4 | 240.4  | 0.2226 | 1.058    | 17.536 |
| 3 | 12.419 | 6481.1 | 378.4  | 0.261  | 0.833    | 32.422 |
| 4 | 14.211 | 6500.7 | 336.2  | 0.2955 | 0.87     | 32.520 |

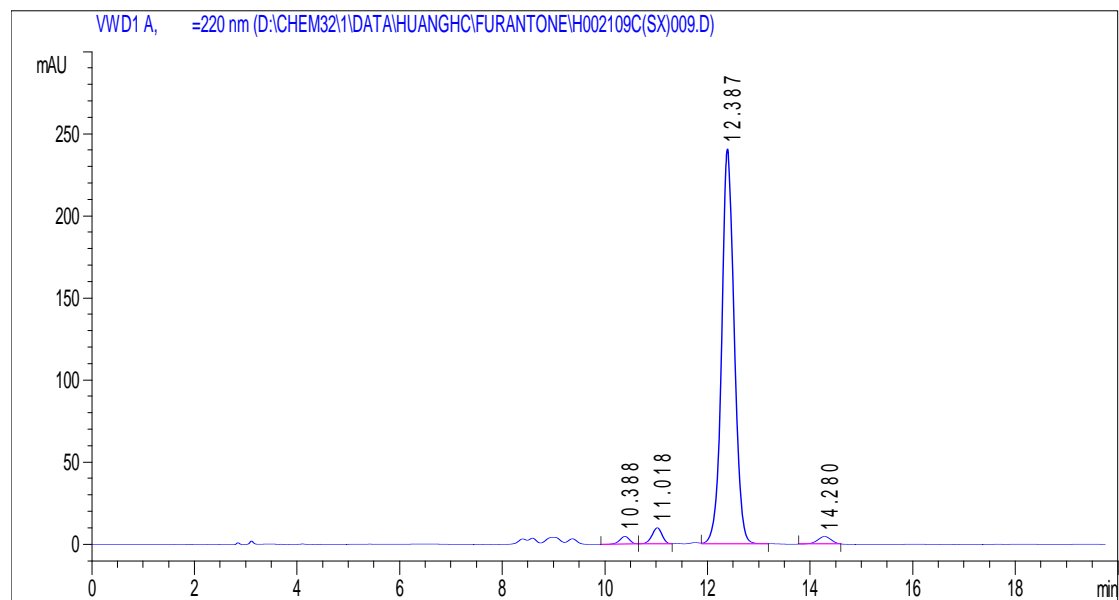

| # | Time   | Area   | Height | Width  | Symmetry | Area % |
|---|--------|--------|--------|--------|----------|--------|
| 1 | 10.388 | 68.6   | 4.9    | 0.2141 | 1.082    | 1.559  |
| 2 | 11.018 | 144.8  | 10.1   | 0.2201 | 1.103    | 3.291  |
| 3 | 12.387 | 4102.2 | 240.6  | 0.2571 | 0.848    | 93.206 |
| 4 | 14.28  | 85.6   | 4.6    | 0.309  | 1.097    | 1.944  |

**6d: 5-(1-(4-fluorophenyl)-3-oxobutyl)furan-2(5H)-one**

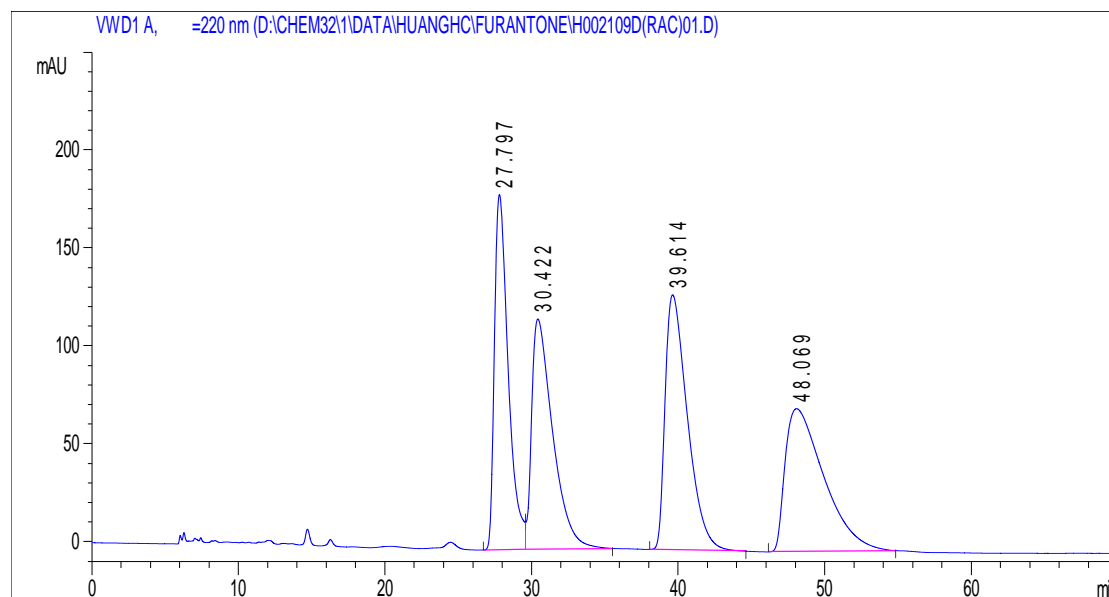

| # | Time   | Area    | Height | Width  | Symmetry | Area % |
|---|--------|---------|--------|--------|----------|--------|
| 1 | 27.797 | 11874.1 | 181.5  | 0.9992 | 0.522    | 23.353 |
| 2 | 30.422 | 11781   | 117.7  | 1.4936 | 0.391    | 23.170 |
| 3 | 39.614 | 13761.8 | 130.3  | 1.6225 | 0.473    | 27.066 |
| 4 | 48.069 | 13428.6 | 73     | 2.7156 | 0.391    | 26.411 |

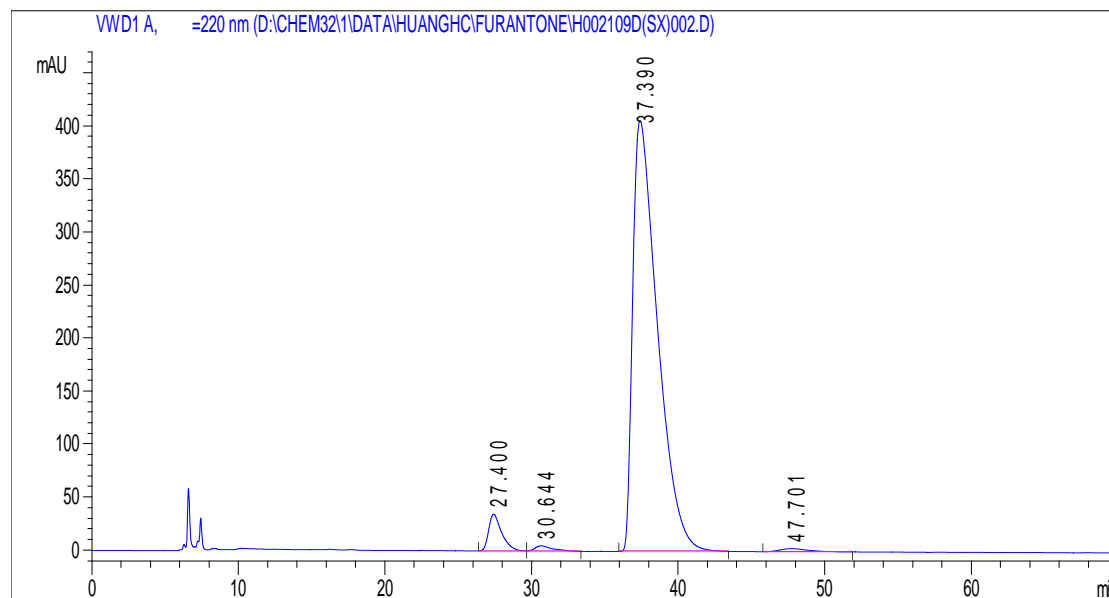

| # | Time   | Area    | Height | Width  | Symmetry | Area % |
|---|--------|---------|--------|--------|----------|--------|
| 1 | 27.4   | 2162.5  | 34.8   | 0.9203 | 0.566    | 4.265  |
| 2 | 30.644 | 437     | 5.1    | 1.2081 | 0.484    | 0.862  |
| 3 | 37.39  | 47698.7 | 406.2  | 1.7601 | 0.388    | 94.067 |
| 4 | 47.701 | 408.7   | 3      | 1.6095 | 0.629    | 0.806  |



6e: 5-(1-(2-chlorophenyl)-3-oxobutyl)furan-2(5H)-one

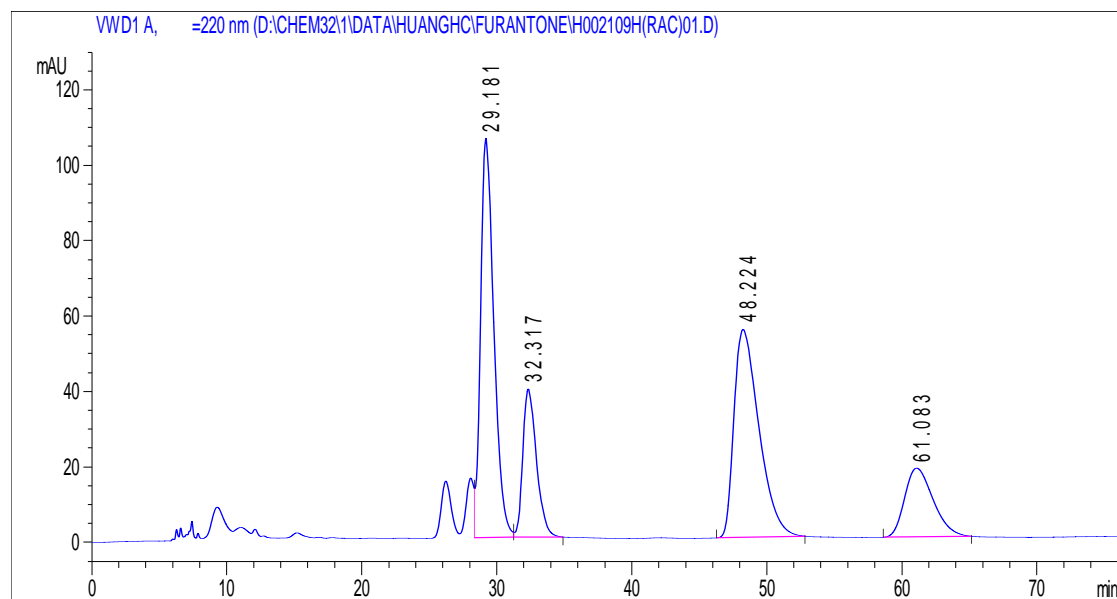

| # | Time   | Area   | Height | Width  | Symmetry | Area % |
|---|--------|--------|--------|--------|----------|--------|
| 1 | 29.181 | 7264.1 | 106    | 1.0589 | 0.63     | 36.553 |
| 2 | 32.317 | 2787.8 | 39.4   | 1.0879 | 0.641    | 14.028 |
| 3 | 48.224 | 7113.1 | 55.2   | 1.9381 | 0.537    | 35.793 |
| 4 | 61.083 | 2708   | 18.3   | 2.1311 | 0.696    | 13.626 |

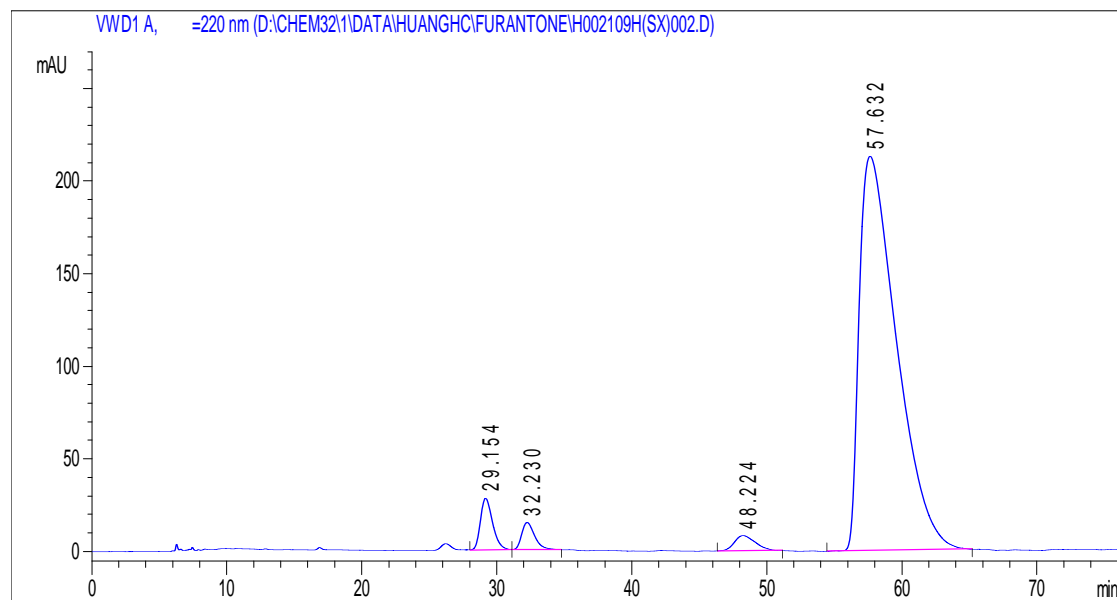

| # | Time   | Area    | Height | Width  | Symmetry | Area % |
|---|--------|---------|--------|--------|----------|--------|
| 1 | 29.154 | 1777.8  | 28     | 0.9784 | 0.694    | 3.986  |
| 2 | 32.23  | 1012.4  | 14.9   | 1.015  | 0.677    | 2.270  |
| 3 | 48.224 | 914.7   | 8.3    | 1.5672 | 0.675    | 2.051  |
| 4 | 57.632 | 40893.7 | 213.2  | 2.8553 | 0.381    | 91.693 |

**6f: 5-(1-(3-chlorophenyl)-3-oxobutyl)furan-2(5H)-one**

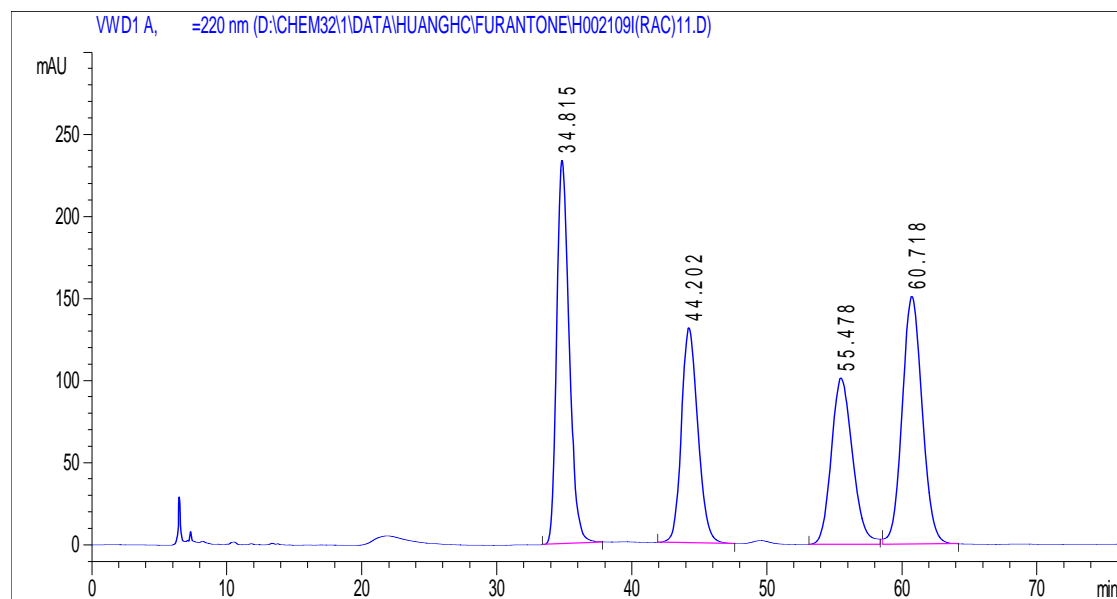

| # | Time   | Area    | Height | Width  | Symmetry | Area % |
|---|--------|---------|--------|--------|----------|--------|
| 1 | 34.815 | 15033.7 | 233.6  | 0.9897 | 0.705    | 28.472 |
| 2 | 44.202 | 11099.4 | 131.1  | 1.3077 | 0.779    | 21.021 |
| 3 | 55.478 | 11089.7 | 101.4  | 1.5585 | 0.797    | 21.03  |
| 4 | 60.718 | 15578.6 | 150.9  | 1.5916 | 0.894    | 29.504 |

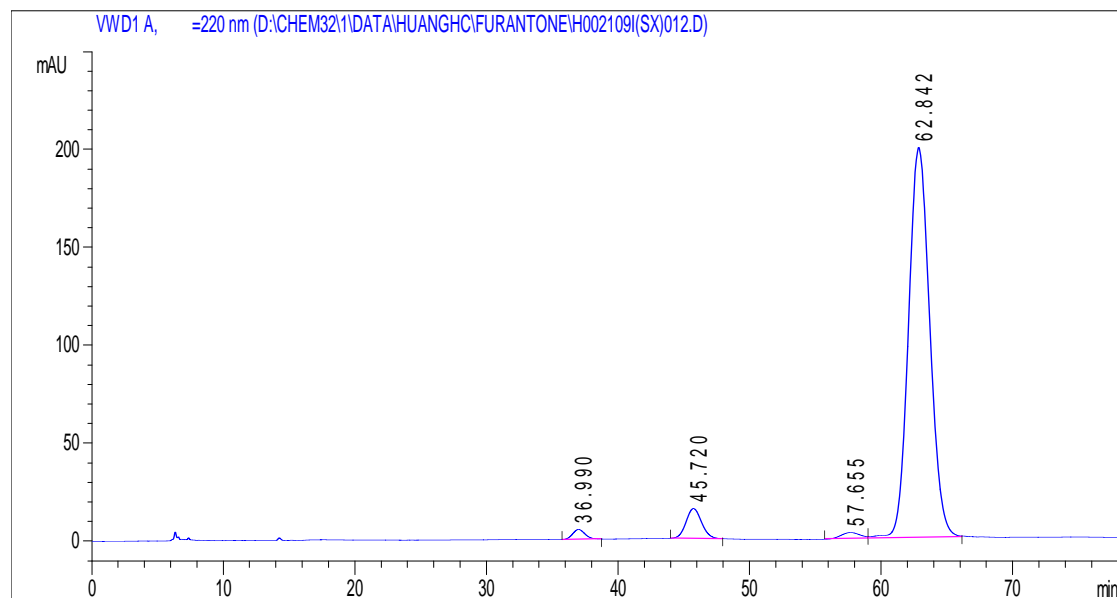

| # | Time   | Area    | Height | Width  | Symmetry | Area % |
|---|--------|---------|--------|--------|----------|--------|
| 1 | 36.99  | 329     | 5      | 0.9838 | 0.875    | 1.355  |
| 2 | 45.72  | 1270.7  | 15.4   | 1.242  | 0.887    | 5.234  |
| 3 | 57.655 | 325.9   | 3.2    | 1.2231 | 0.958    | 1.342  |
| 4 | 62.842 | 22351.6 | 199.1  | 1.7405 | 0.894    | 92.068 |

**6g: 5-(1-(3-bromophenyl)-3-oxobutyl)furan-2(5H)-one**

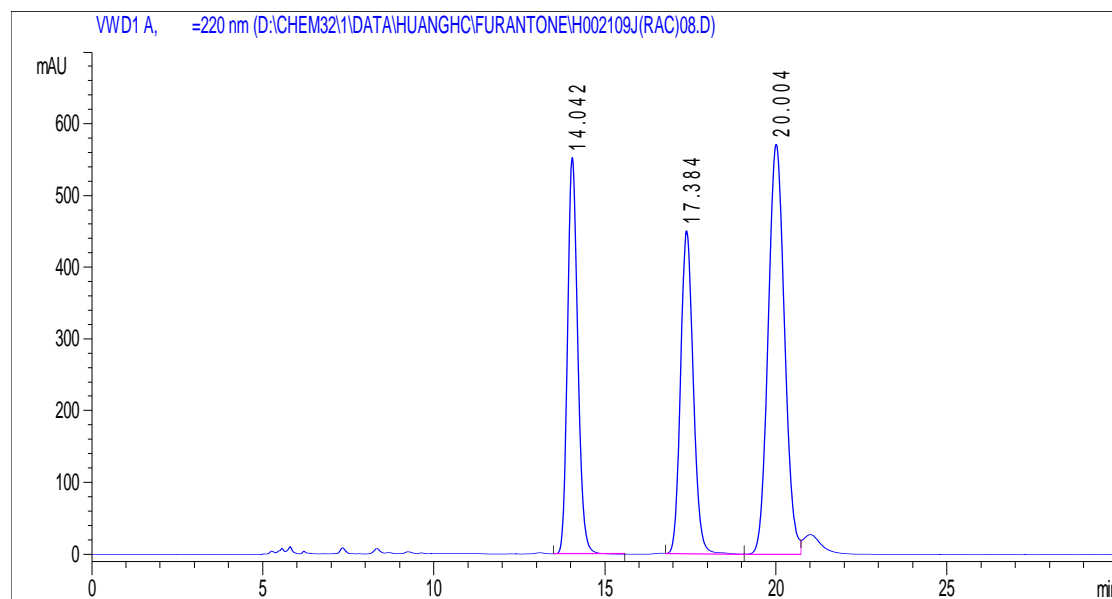

| # | Time   | Area    | Height | Width  | Symmetry | Area % |
|---|--------|---------|--------|--------|----------|--------|
| 1 | 14.042 | 11548.2 | 553.1  | 0.3222 | 0.809    | 27.313 |
| 2 | 17.384 | 11722.4 | 451.3  | 0.402  | 0.848    | 27.725 |
| 3 | 20.004 | 19010.5 | 571.8  | 0.516  | 0.912    | 44.962 |

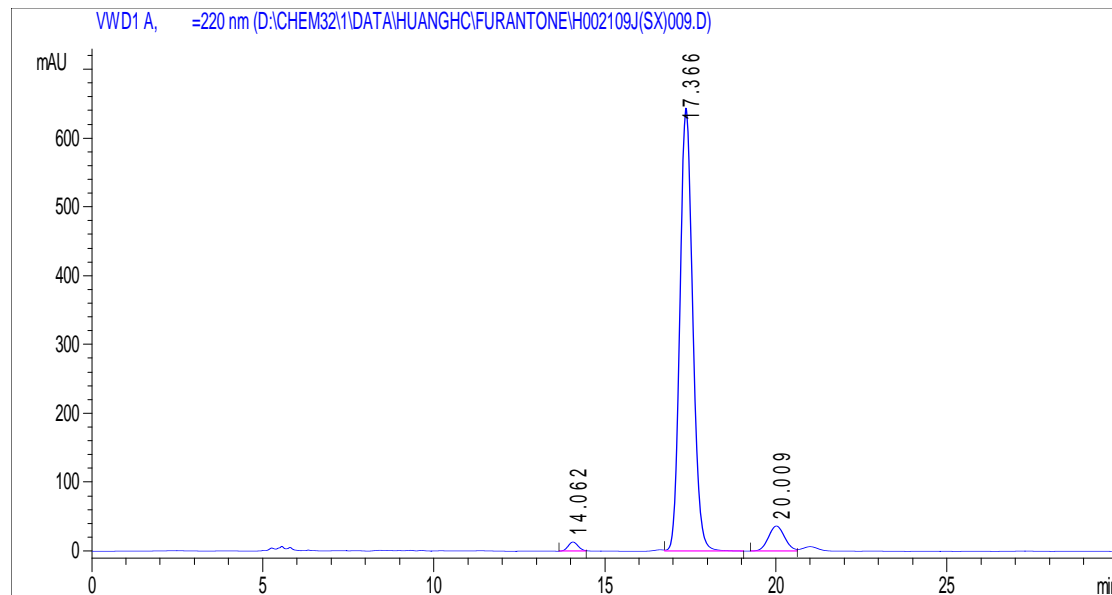

| # | Time   | Area    | Height | Width  | Symmetry | Area % |
|---|--------|---------|--------|--------|----------|--------|
| 1 | 14.062 | 265.8   | 13.2   | 0.3363 | 0.927    | 1.453  |
| 2 | 17.366 | 16806.9 | 644.1  | 0.4063 | 0.843    | 91.873 |
| 3 | 20.009 | 1221    | 36.6   | 0.52   | 0.924    | 6.674  |

**6h: 5-(1-(4-bromophenyl)-3-oxobutyl)furan-2(5H)-one**

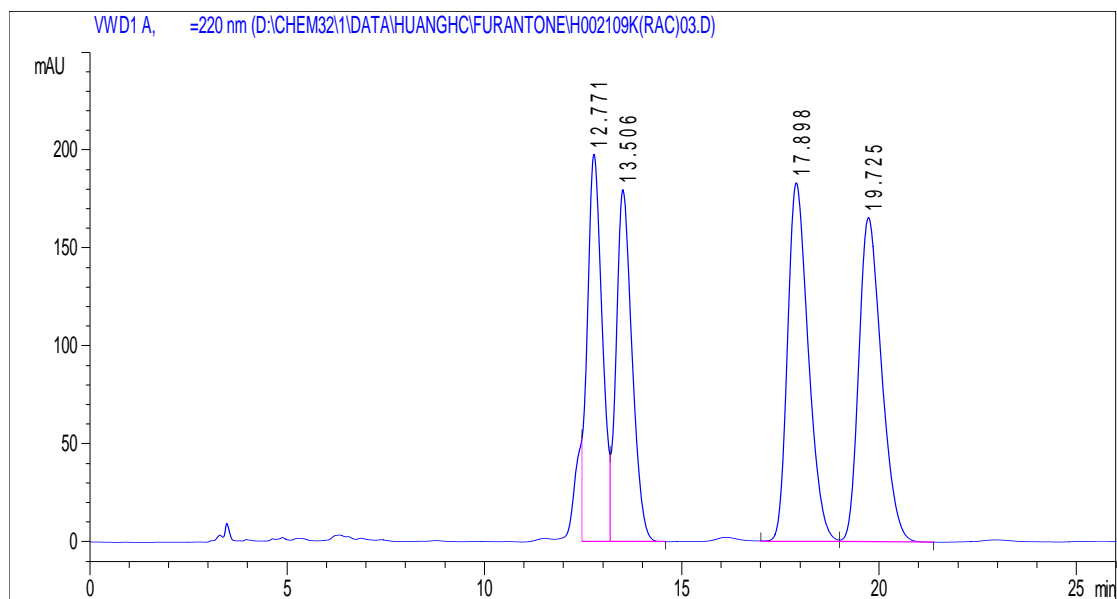

| # | Time   | Area   | Height | Width  | Symmetry | Area % |
|---|--------|--------|--------|--------|----------|--------|
| 1 | 12.771 | 5173.9 | 198    | 0.4355 | 0.775    | 21.970 |
| 2 | 13.506 | 5027.4 | 179.8  | 0.4223 | 0.71     | 21.348 |
| 3 | 17.898 | 6708.9 | 183.4  | 0.5579 | 0.693    | 28.489 |
| 4 | 19.725 | 6639.3 | 165.8  | 0.6158 | 0.696    | 28.193 |

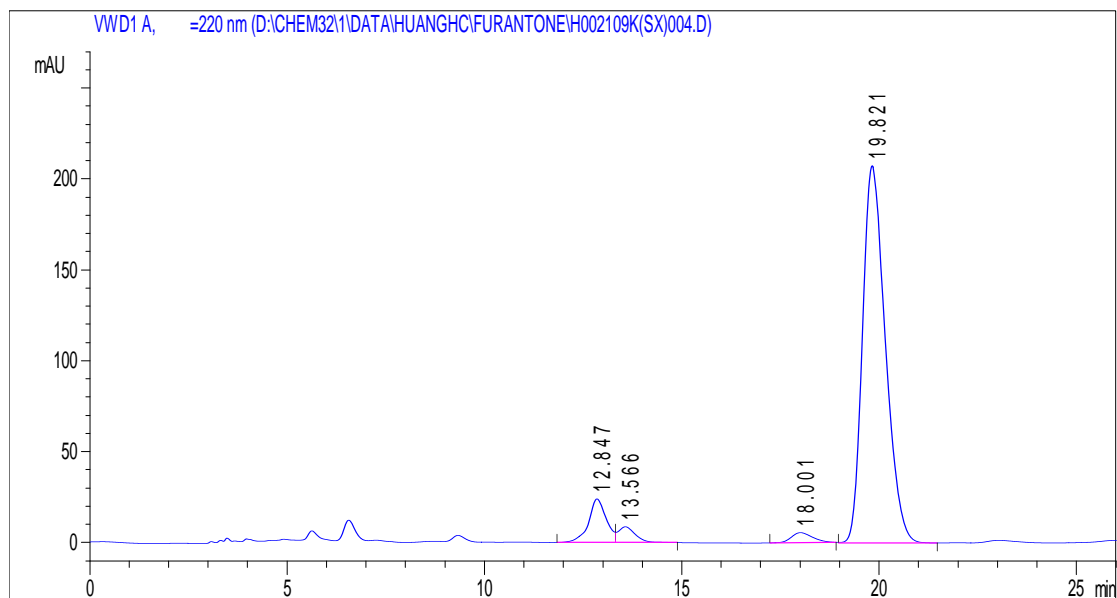

| # | Time   | Area   | Height | Width  | Symmetry | Area % |
|---|--------|--------|--------|--------|----------|--------|
| 1 | 12.847 | 753.8  | 24     | 0.4619 | 0.915    | 7.888  |
| 2 | 13.566 | 265.8  | 8.7    | 0.4449 | 0.612    | 2.781  |
| 3 | 18.001 | 210.3  | 5.6    | 0.6294 | 0.741    | 2.201  |
| 4 | 19.821 | 8327.2 | 207.5  | 0.6168 | 0.701    | 87.131 |

**6i: 5-(1-(2-methoxyphenyl)-3-oxobutyl)furan-2(5H)-one**

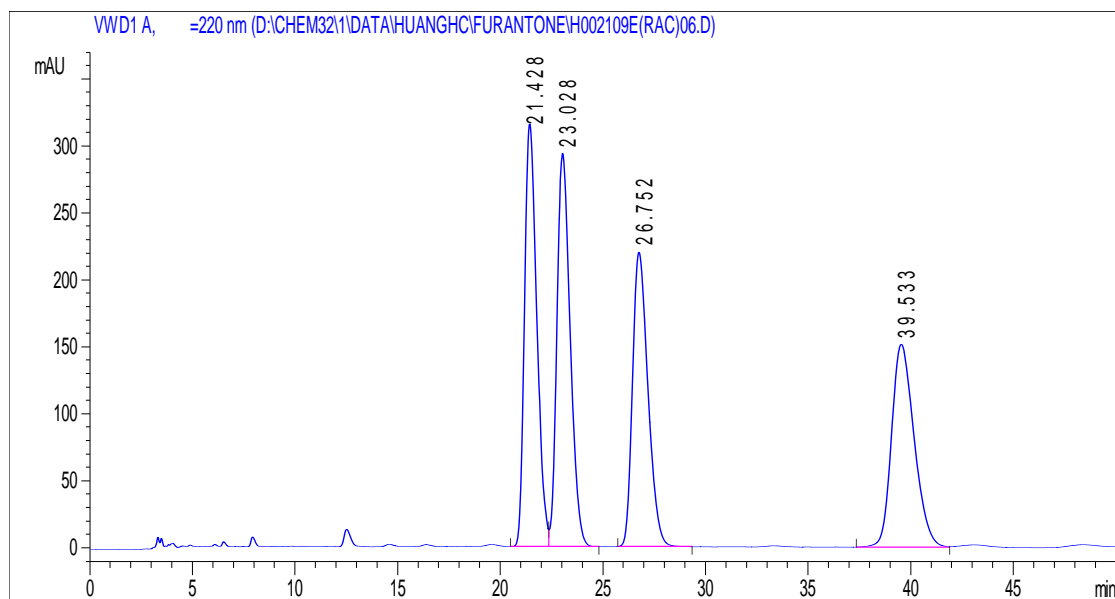

| # | Time   | Area    | Height | Width  | Symmetry | Area % |
|---|--------|---------|--------|--------|----------|--------|
| 1 | 21.428 | 13098.7 | 315.7  | 0.6443 | 0.696    | 26.523 |
| 2 | 23.028 | 13199.3 | 293.6  | 0.6963 | 0.701    | 26.727 |
| 3 | 26.752 | 11477.4 | 219.7  | 0.8074 | 0.68     | 23.240 |
| 4 | 39.533 | 11610.7 | 151.5  | 1.1793 | 0.725    | 23.510 |

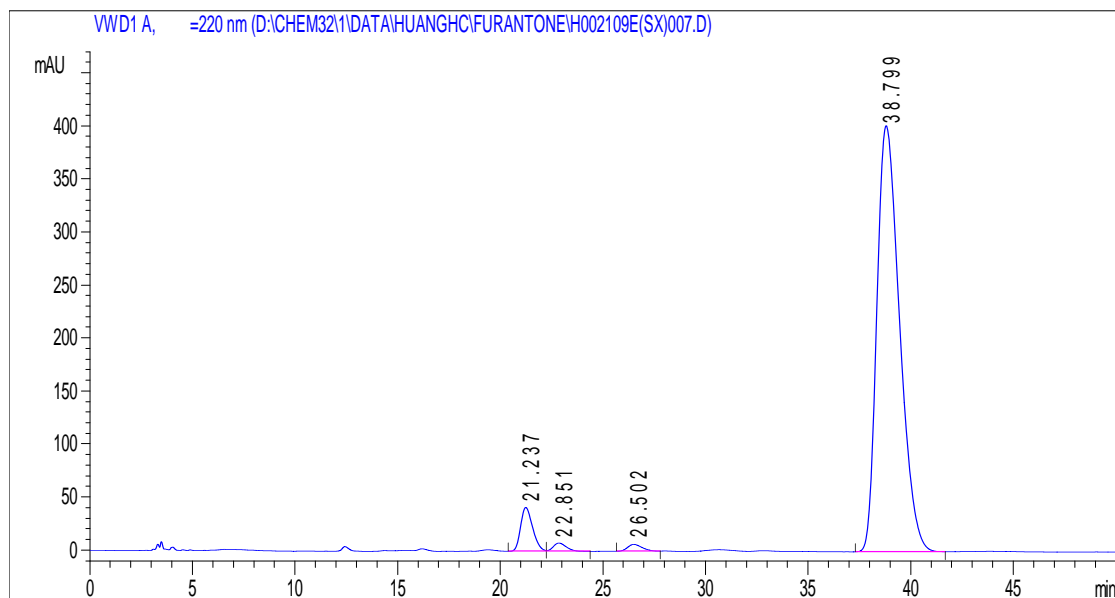

| # | Time   | Area    | Height | Width  | Symmetry | Area % |
|---|--------|---------|--------|--------|----------|--------|
| 1 | 21.237 | 1699.7  | 41.4   | 0.6329 | 0.72     | 5.126  |
| 2 | 22.851 | 351.1   | 7.9    | 0.669  | 0.731    | 1.059  |
| 3 | 26.502 | 307.3   | 6.4    | 0.733  | 0.73     | 0.927  |
| 4 | 38.799 | 30800.7 | 401.8  | 1.1914 | 0.658    | 92.888 |

**6j: 5-(1-(3-methoxyphenyl)-3-oxobutyl)furan-2(5H)-one**

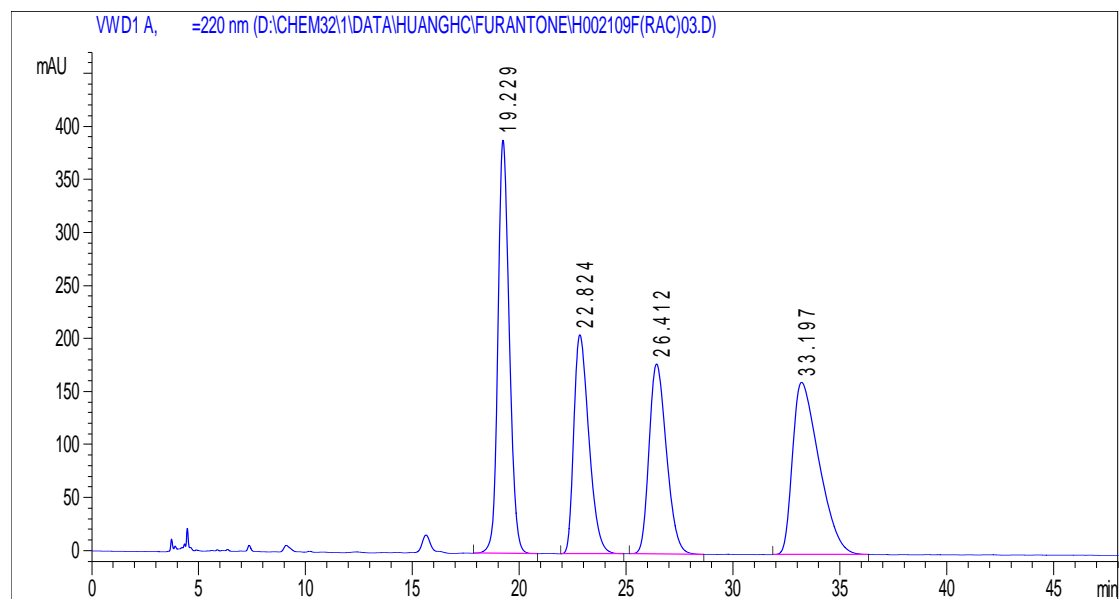

| # | Time   | Area    | Height | Width  | Symmetry | Area % |
|---|--------|---------|--------|--------|----------|--------|
| 1 | 19.229 | 14344   | 389.7  | 0.5692 | 0.786    | 29.499 |
| 2 | 22.824 | 10132.5 | 206.7  | 0.7584 | 0.629    | 20.838 |
| 3 | 26.412 | 10157.2 | 179.4  | 0.8788 | 0.723    | 20.889 |
| 4 | 33.197 | 13991.5 | 162.4  | 1.3283 | 0.49     | 28.774 |

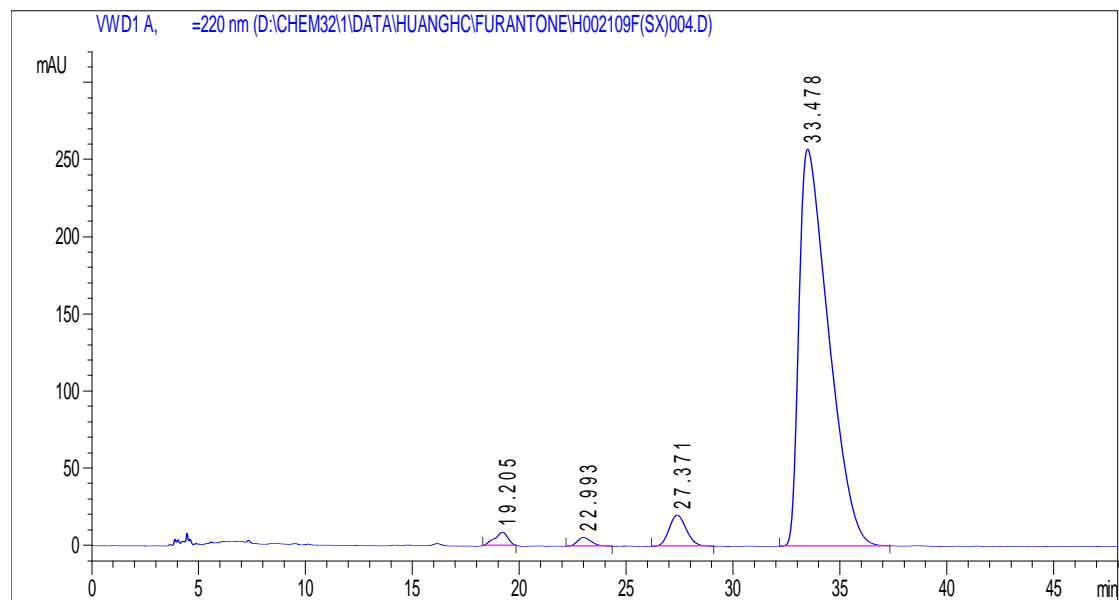

| # | Time   | Area    | Height | Width  | Symmetry | Area % |
|---|--------|---------|--------|--------|----------|--------|
| 1 | 19.205 | 381.5   | 8.7    | 0.7319 | 1.427    | 1.438  |
| 2 | 22.993 | 263.5   | 5.8    | 0.697  | 0.747    | 0.993  |
| 3 | 27.371 | 1147.6  | 20.4   | 0.864  | 0.825    | 4.327  |
| 4 | 33.478 | 24731.2 | 257.4  | 1.45   | 0.385    | 93.242 |

**6k: 5-(1-(4-methoxyphenyl)-3-oxobutyl)furan-2(5H)-one**

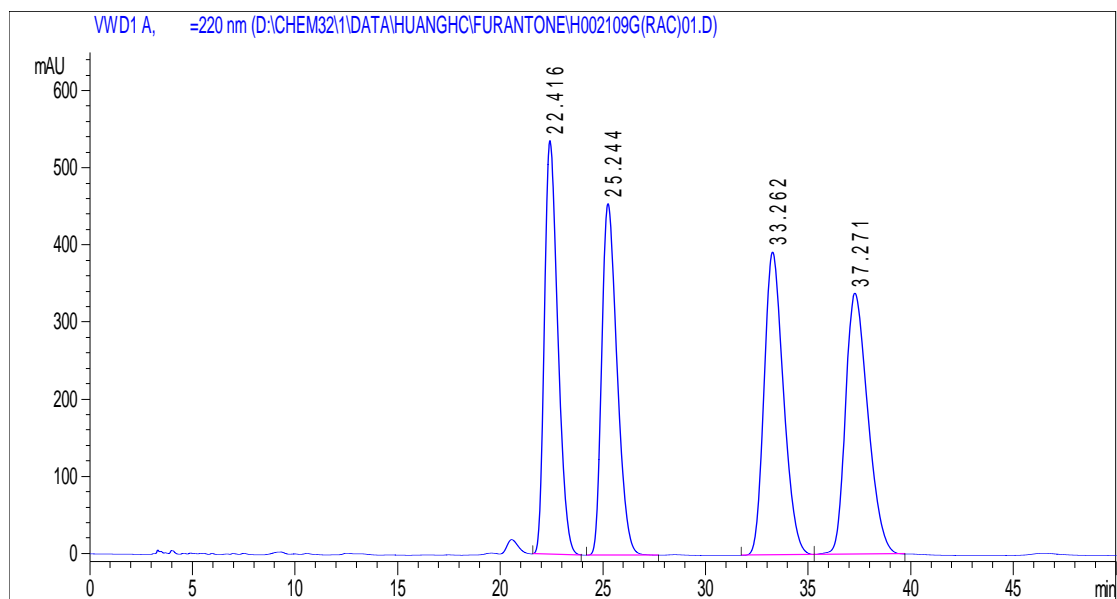

| # | Time   | Area    | Height | Width  | Symmetry | Area % |
|---|--------|---------|--------|--------|----------|--------|
| 1 | 22.416 | 24359.9 | 536.7  | 0.7565 | 0        | 24.464 |
| 2 | 25.244 | 23713.6 | 456    | 0.8047 | 0.656    | 23.815 |
| 3 | 33.262 | 25786.9 | 393    | 1.043  | 0.742    | 25.897 |
| 4 | 37.271 | 25715.9 | 338.8  | 1.1739 | 0.691    | 25.825 |

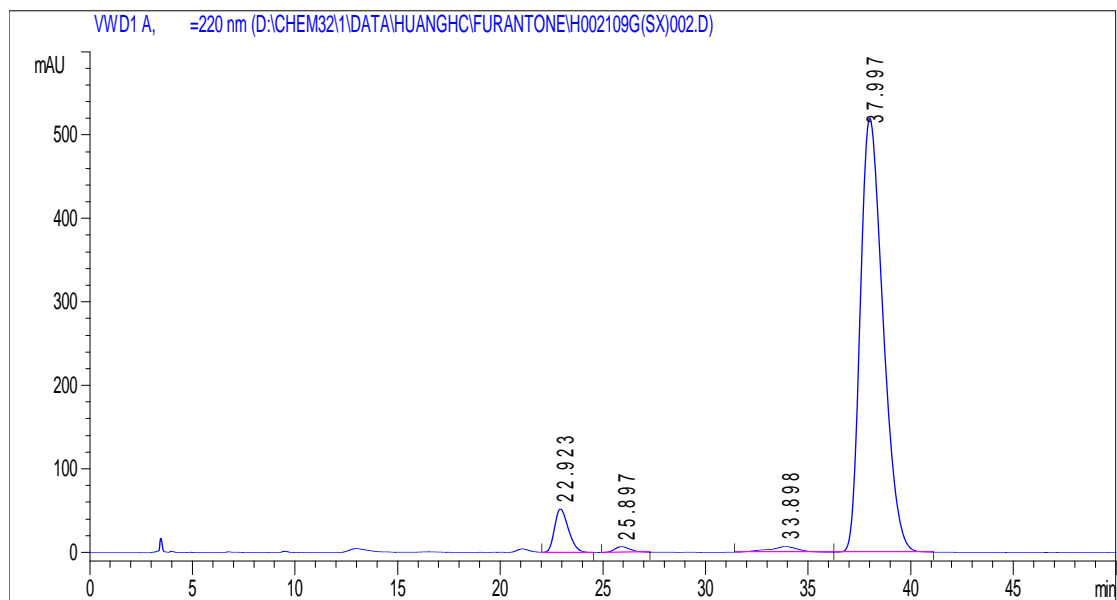

| # | Time   | Area    | Height | Width  | Symmetry | Area % |
|---|--------|---------|--------|--------|----------|--------|
| 1 | 22.923 | 2431.6  | 52     | 0.7232 | 0.698    | 5.607  |
| 2 | 25.897 | 348.7   | 6.7    | 0.7836 | 0.738    | 0.804  |
| 3 | 33.898 | 701     | 6.9    | 1.4175 | 1.398    | 1.617  |
| 4 | 37.997 | 39886.1 | 520.1  | 1.1888 | 0.674    | 91.972 |

**6l: 5-(3-oxo-1-*m*-tolylbutyl)furan-2(5*H*)-one**

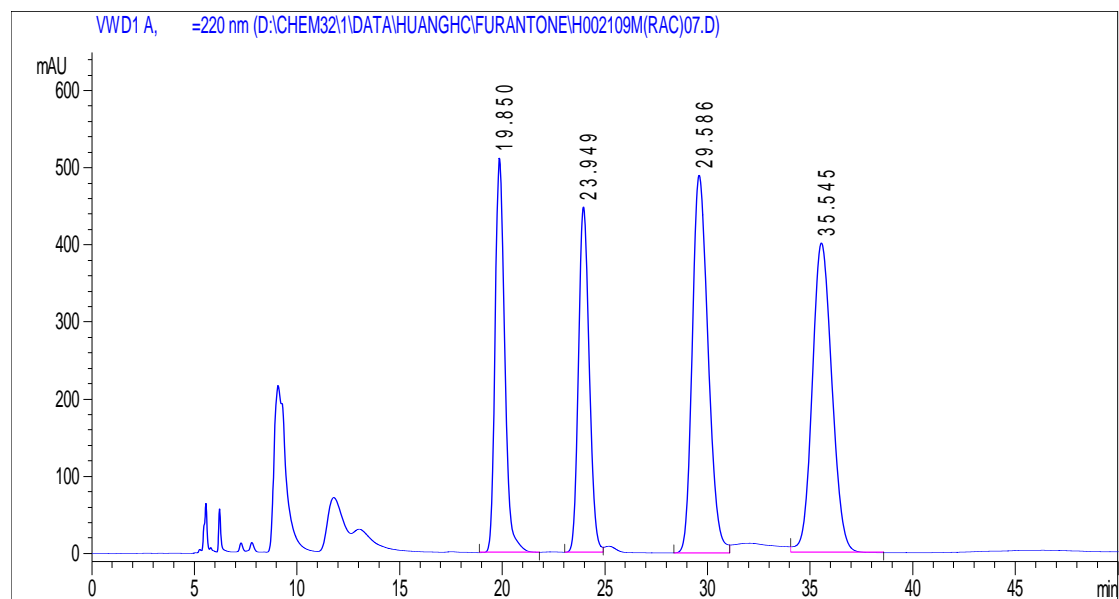

| # | Time   | Area    | Height | Width  | Symmetry | Area % |
|---|--------|---------|--------|--------|----------|--------|
| 1 | 19.85  | 16788   | 511.5  | 0.5052 | 0.741    | 19.473 |
| 2 | 23.949 | 16384   | 448.5  | 0.5718 | 0.819    | 19.005 |
| 3 | 29.586 | 26245.7 | 489.6  | 0.8351 | 0.725    | 30.444 |
| 4 | 35.545 | 26792.3 | 401.7  | 1.0373 | 0.85     | 31.078 |

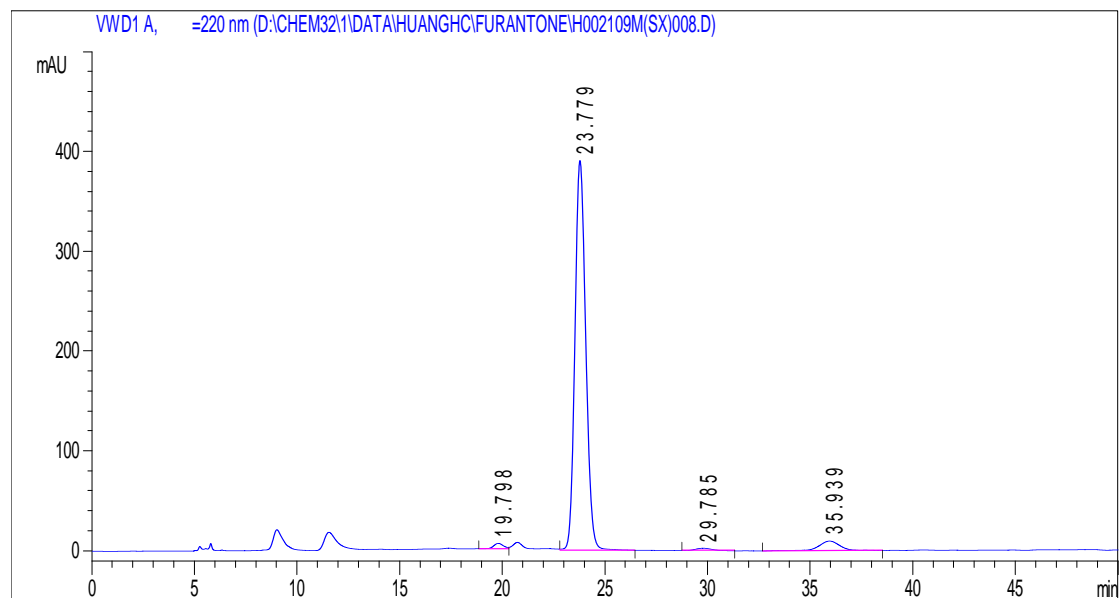

| # | Time   | Area    | Height | Width  | Symmetry | Area % |
|---|--------|---------|--------|--------|----------|--------|
| 1 | 19.798 | 184.1   | 5.5    | 0.5617 | 0        | 1.196  |
| 2 | 23.779 | 14318.8 | 390.5  | 0.5705 | 0.826    | 93.064 |
| 3 | 29.785 | 139.3   | 2.5    | 0.7514 | 0.818    | 0.906  |
| 4 | 35.939 | 743.8   | 9.7    | 1.1239 | 1.021    | 4.834  |



**6m: 5-(3-oxo-1-*p*-tolylbutyl)furan-2(5*H*)-one**

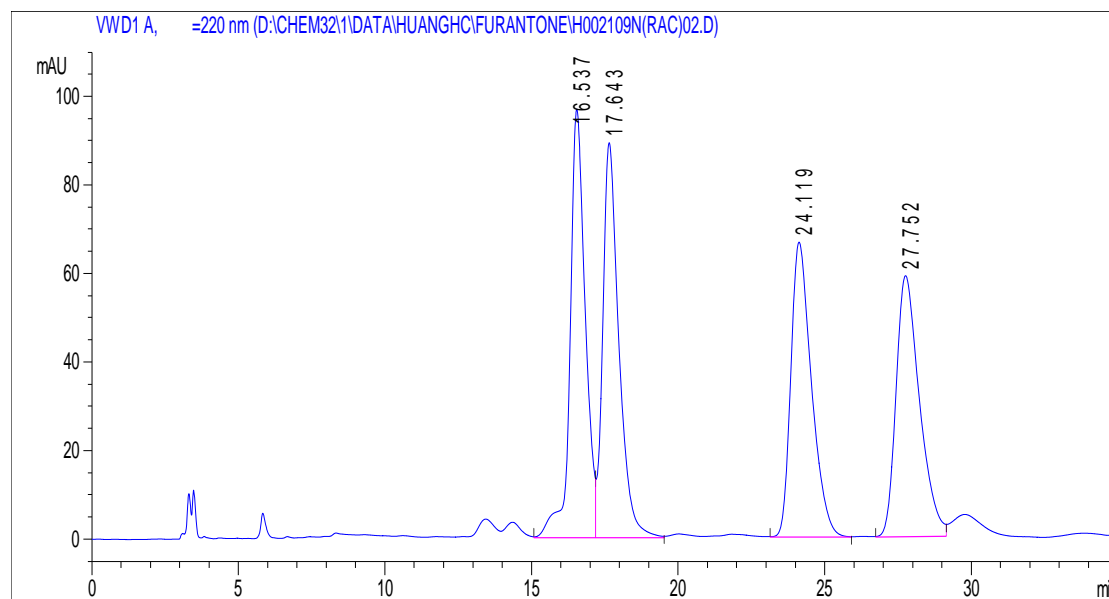

| # | Time   | Area   | Height | Width  | Symmetry | Area % |
|---|--------|--------|--------|--------|----------|--------|
| 1 | 16.537 | 3510.6 | 96.9   | 0.5362 | 0.813    | 26.074 |
| 2 | 17.643 | 3397.9 | 89.3   | 0.5633 | 0.613    | 25.237 |
| 3 | 24.119 | 3265   | 66.7   | 0.7369 | 0.63     | 24.250 |
| 4 | 27.752 | 3290.7 | 59.1   | 0.8365 | 0.639    | 24.440 |

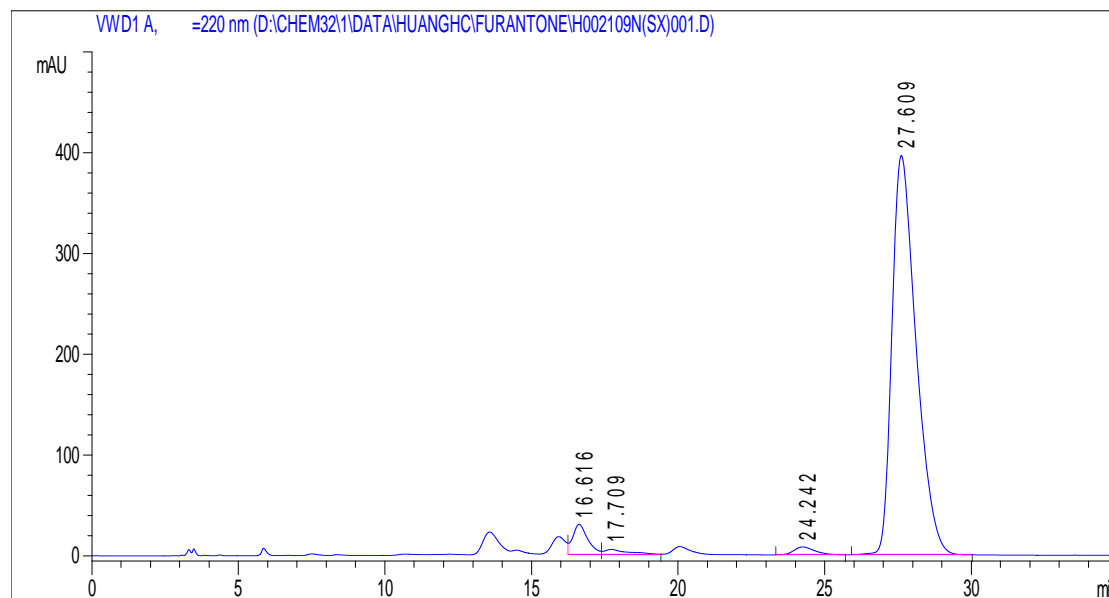

| # | Time   | Area    | Height | Width  | Symmetry | Area % |
|---|--------|---------|--------|--------|----------|--------|
| 1 | 16.616 | 1110.9  | 30.5   | 0.5302 | 0.684    | 4.529  |
| 2 | 17.709 | 336     | 5.5    | 0.81   | 0.312    | 1.370  |
| 3 | 24.242 | 393.8   | 7.9    | 0.7484 | 0.683    | 1.605  |
| 4 | 27.609 | 22688.1 | 396.2  | 0.8662 | 0.6      | 92.496 |

**6n: 5-(1-(2,3-dimethoxyphenyl)-3-oxobutyl)furan-2(5H)-one**

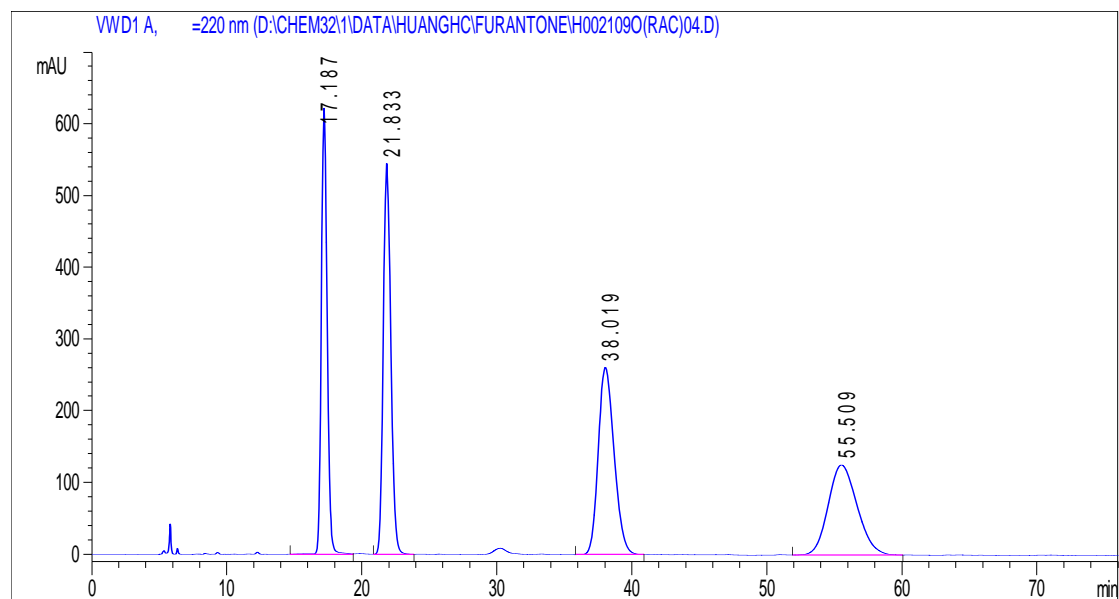

| # | Time   | Area    | Height | Width  | Symmetry | Area % |
|---|--------|---------|--------|--------|----------|--------|
| 1 | 17.187 | 18712.3 | 622.3  | 0.4673 | 0.811    | 23.326 |
| 2 | 21.833 | 21308.3 | 545.2  | 0.6074 | 0.809    | 26.562 |
| 3 | 38.019 | 21353.7 | 261.5  | 1.2671 | 0.759    | 26.618 |
| 4 | 55.509 | 18847.7 | 126    | 2.2896 | 0.818    | 23.494 |

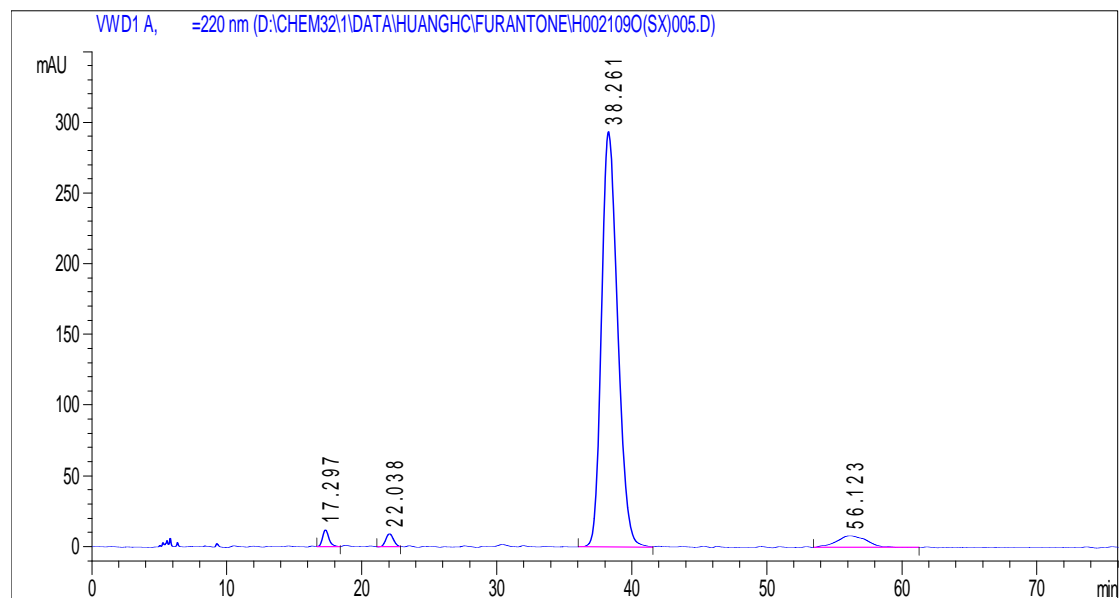

| # | Time   | Area    | Height | Width  | Symmetry | Area % |
|---|--------|---------|--------|--------|----------|--------|
| 1 | 17.297 | 419.6   | 12.2   | 0.5216 | 0.756    | 1.581  |
| 2 | 22.038 | 364.7   | 9.2    | 0.6604 | 0.893    | 1.374  |
| 3 | 38.261 | 24404.8 | 293.8  | 1.2835 | 0.736    | 91.945 |
| 4 | 56.123 | 1353.7  | 8.3    | 2.2202 | 0.749    | 5.100  |

**6o: 5-(1-(2,4-dimethoxyphenyl)-3-oxobutyl)furan-2(5H)-one**

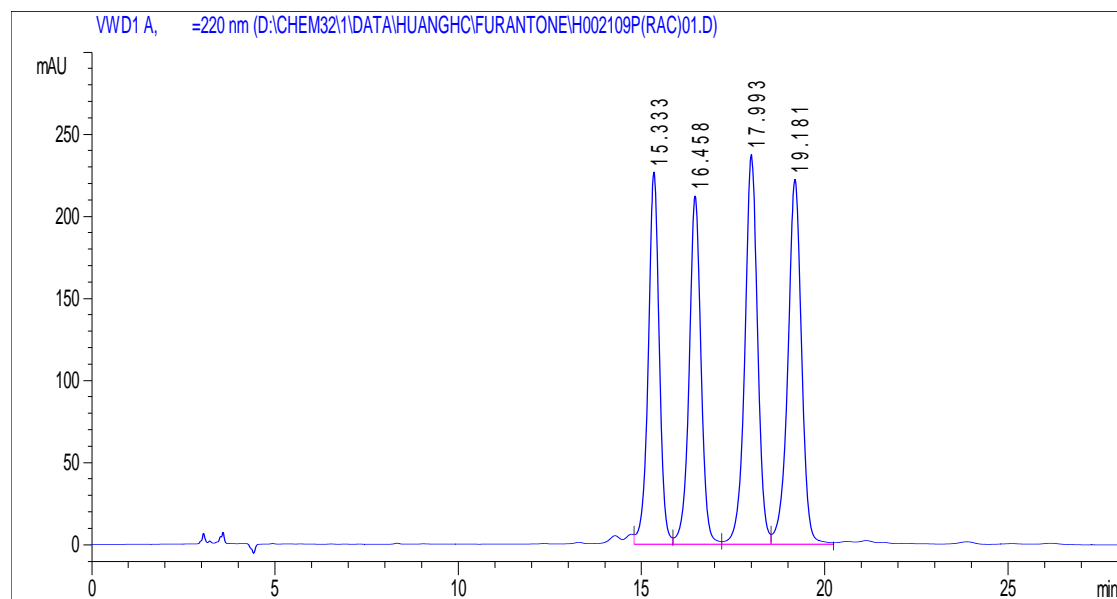

| # | Time   | Area   | Height | Width  | Symmetry | Area % |
|---|--------|--------|--------|--------|----------|--------|
| 1 | 15.333 | 4719.3 | 226.7  | 0.3157 | 1.021    | 22.462 |
| 2 | 16.458 | 4758.8 | 212.1  | 0.3404 | 0.984    | 22.650 |
| 3 | 17.993 | 5743   | 237.4  | 0.3666 | 1.027    | 27.335 |
| 4 | 19.181 | 5788.7 | 222.3  | 0.3941 | 1.036    | 27.552 |

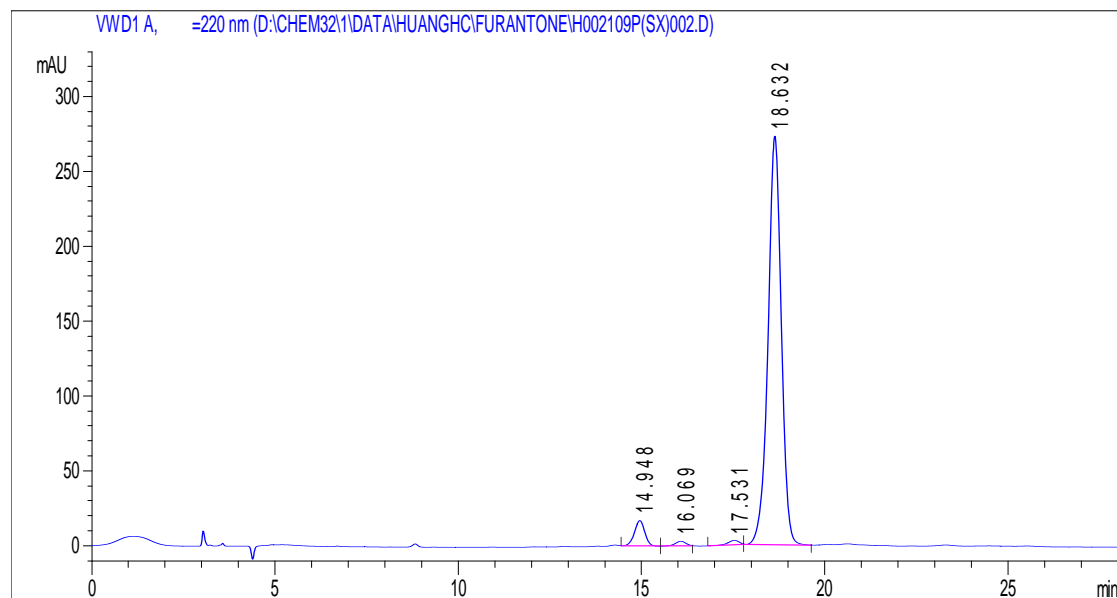

| # | Time   | Area  | Height | Width  | Symmetry | Area % |
|---|--------|-------|--------|--------|----------|--------|
| 1 | 14.948 | 342.5 | 17.2   | 0.3324 | 1.027    | 4.668  |
| 2 | 16.069 | 76.7  | 3.4    | 0.373  | 1.067    | 1.045  |
| 3 | 17.531 | 72.1  | 3.2    | 0.3773 | 1.438    | 0.982  |
| 4 | 18.632 | 6847  | 273    | 0.418  | 0        | 93.305 |

**6p: 5-(1-(naphthalen-2-yl)-3-oxobutyl)furan-2(5H)-one**

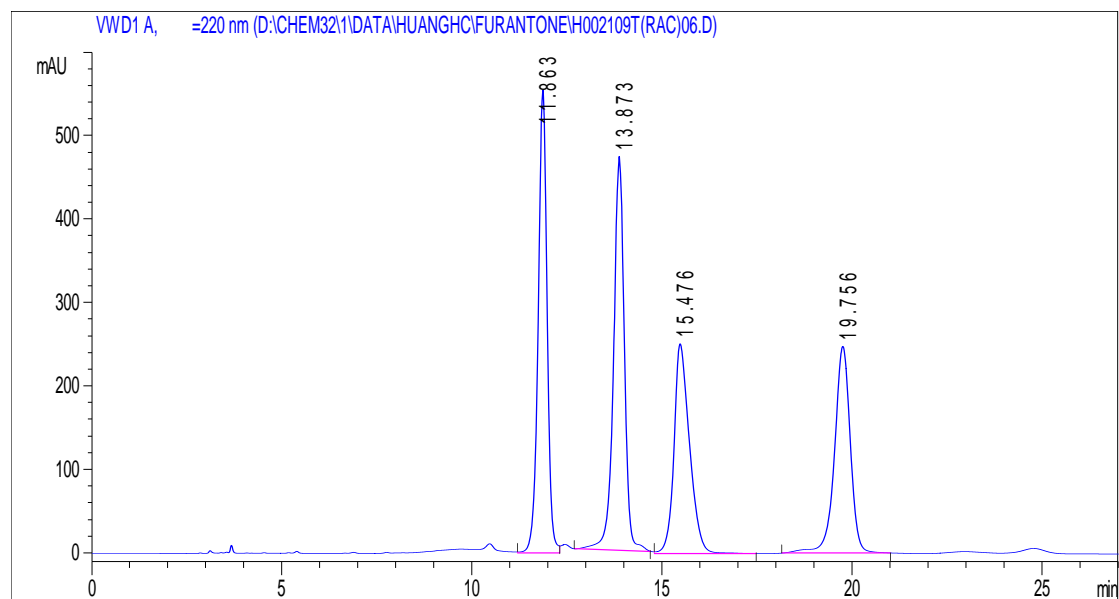

| # | Time   | Area   | Height | Width  | Symmetry | Area % |
|---|--------|--------|--------|--------|----------|--------|
| 1 | 11.863 | 9083.3 | 555.3  | 0.2462 | 1.053    | 27.717 |
| 2 | 13.873 | 9387.4 | 472.4  | 0.3312 | 1.067    | 28.645 |
| 3 | 15.476 | 7135.8 | 251.4  | 0.4214 | 0.632    | 21.774 |
| 4 | 19.756 | 7165.3 | 247.7  | 0.4822 | 1.109    | 21.864 |

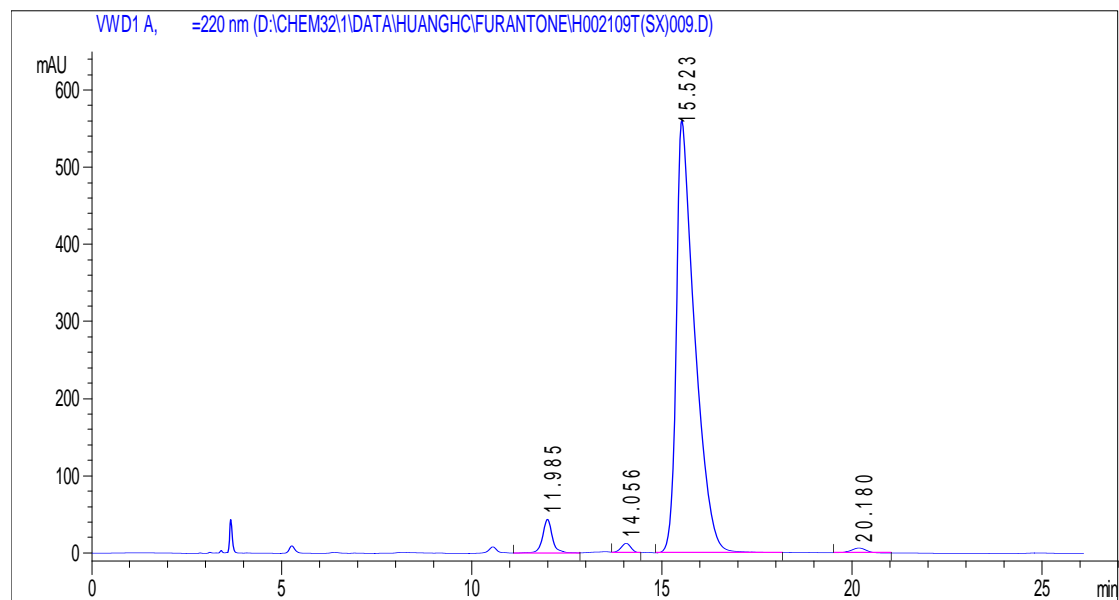

| # | Time   | Area    | Height | Width  | Symmetry | Area % |
|---|--------|---------|--------|--------|----------|--------|
| 1 | 11.985 | 809.3   | 44     | 0.2729 | 0.967    | 4.047  |
| 2 | 14.056 | 236.9   | 12.4   | 0.2919 | 1.097    | 1.184  |
| 3 | 15.523 | 18783.3 | 560.3  | 0.4756 | 0.411    | 93.930 |
| 4 | 20.18  | 167.6   | 6.2    | 0.4155 | 1.077    | 0.838  |

**6q: 5-(1-(furan-2-yl)-3-oxobutyl)furan-2(5H)-one**

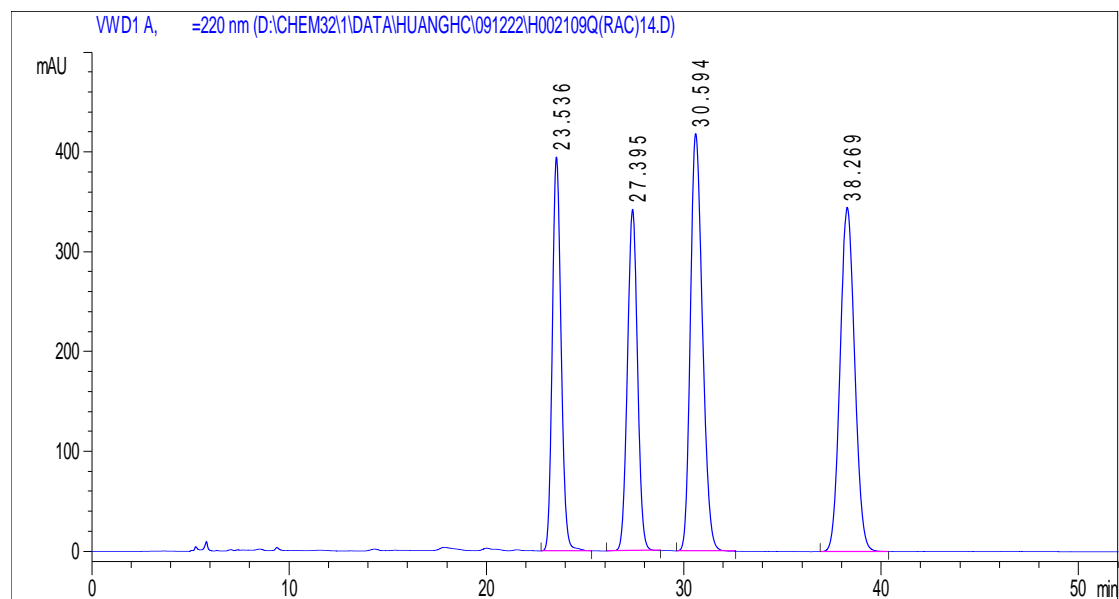

| # | Time   | Area    | Height | Width  | Symmetry | Area % |
|---|--------|---------|--------|--------|----------|--------|
| 1 | 23.536 | 12151   | 394.7  | 0.4786 | 0.828    | 20.330 |
| 2 | 27.395 | 12104.6 | 342.1  | 0.5526 | 0.988    | 20.253 |
| 3 | 30.594 | 17736.7 | 418.2  | 0.6608 | 0.741    | 29.676 |
| 4 | 38.269 | 17775.2 | 345    | 0.8049 | 0.905    | 29.741 |

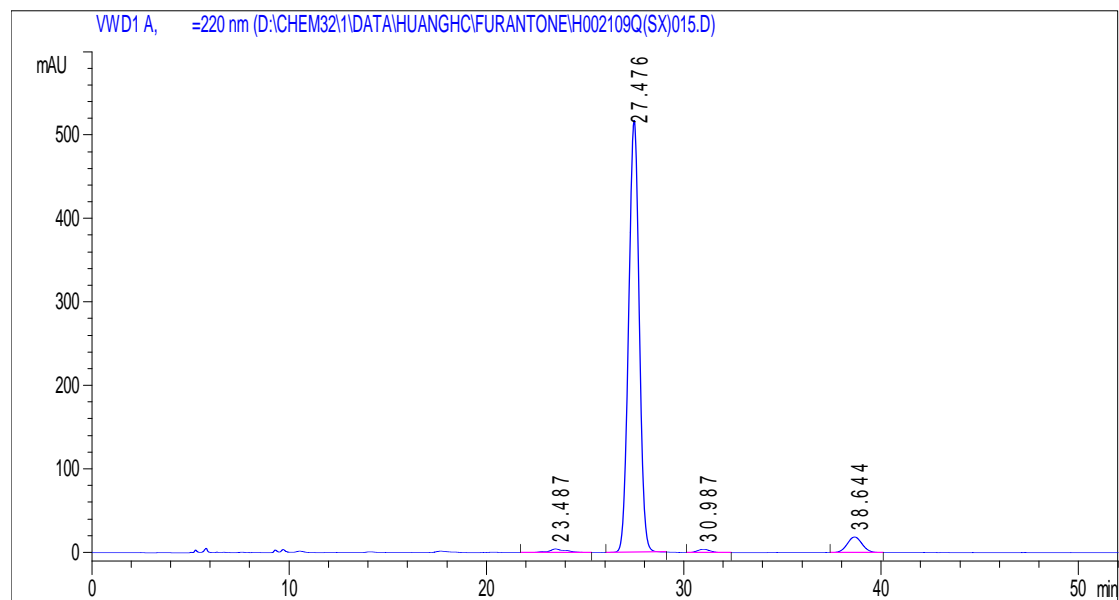

| # | Time   | Area    | Height | Width  | Symmetry | Area % |
|---|--------|---------|--------|--------|----------|--------|
| 1 | 23.487 | 270.1   | 4.3    | 0.8347 | 0.749    | 1.310  |
| 2 | 27.476 | 19196.3 | 517.5  | 0.5783 | 1.039    | 93.099 |
| 3 | 30.987 | 174.8   | 3.9    | 0.6743 | 0.858    | 0.848  |
| 4 | 38.644 | 978     | 18.7   | 0.8148 | 0.938    | 4.743  |

**6r: 5-(3-oxo-1-(thiophen-2-yl)butyl)furan-2(5H)-one**

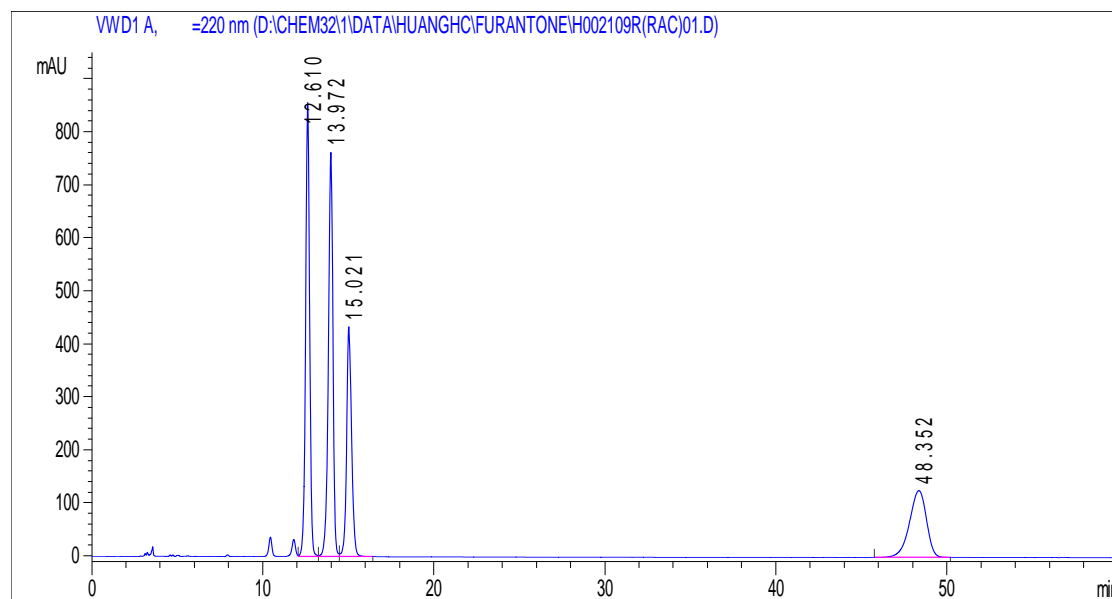

| # | Time   | Area    | Height | Width  | Symmetry | Area % |
|---|--------|---------|--------|--------|----------|--------|
| 1 | 12.61  | 14104.5 | 856.1  | 0.2505 | 0.96     | 30.864 |
| 2 | 13.972 | 14143.5 | 762.3  | 0.2834 | 1.185    | 30.949 |
| 3 | 15.021 | 8771.4  | 433.5  | 0.303  | 0.775    | 19.194 |
| 4 | 48.352 | 8680.2  | 126    | 1.0746 | 1.23     | 18.994 |

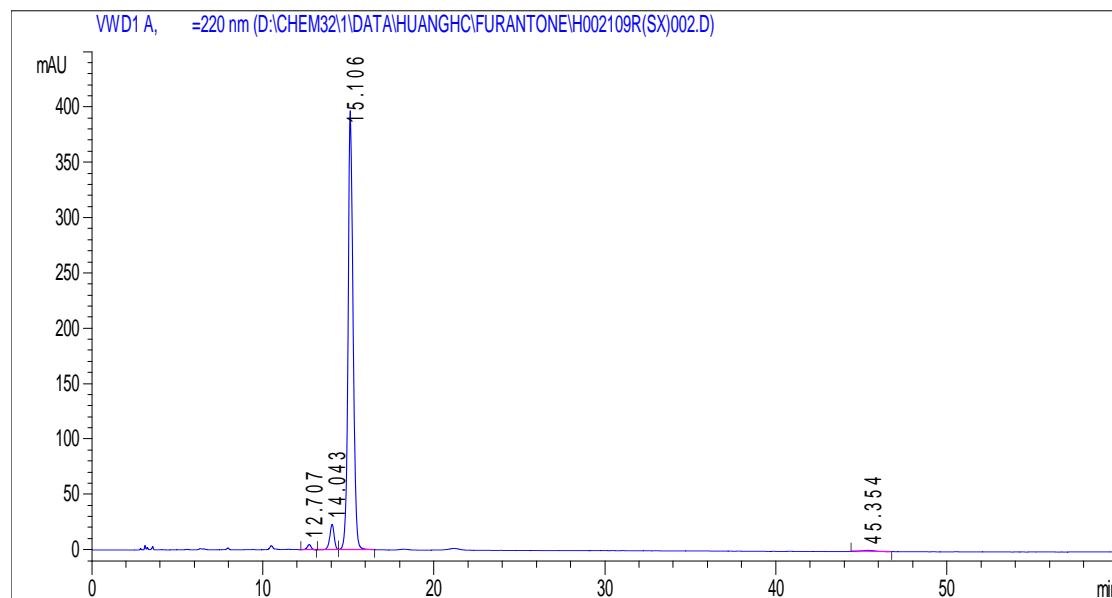

| # | Time   | Area   | Height | Width  | Symmetry | Area % |
|---|--------|--------|--------|--------|----------|--------|
| 1 | 12.707 | 79.1   | 4.8    | 0.2531 | 1.169    | 0.917  |
| 2 | 14.043 | 419.9  | 23.1   | 0.2765 | 1.129    | 4.870  |
| 3 | 15.106 | 8063.9 | 396.7  | 0.307  | 0.786    | 93.522 |
| 4 | 45.354 | 59.6   | 1.1    | 0.7834 | 0.984    | 0.691  |

**6s: 5-(3-oxo-1,3-diphenylpropyl)furan-2(5H)-one**

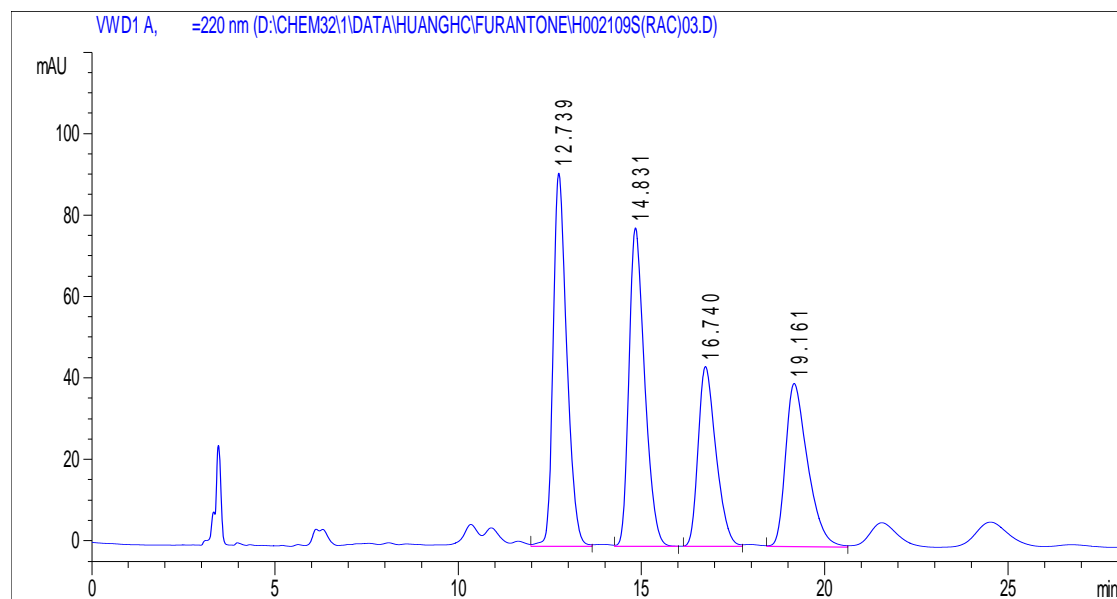

| # | Time   | Area   | Height | Width  | Symmetry | Area % |
|---|--------|--------|--------|--------|----------|--------|
| 1 | 12.739 | 2378.4 | 91.7   | 0.3928 | 0.678    | 30.062 |
| 2 | 14.831 | 2335.8 | 78.3   | 0.4527 | 0.666    | 29.524 |
| 3 | 16.74  | 1505.4 | 44.3   | 0.5158 | 0.66     | 19.028 |
| 4 | 19.161 | 1692   | 40.2   | 0.6282 | 0.604    | 21.386 |

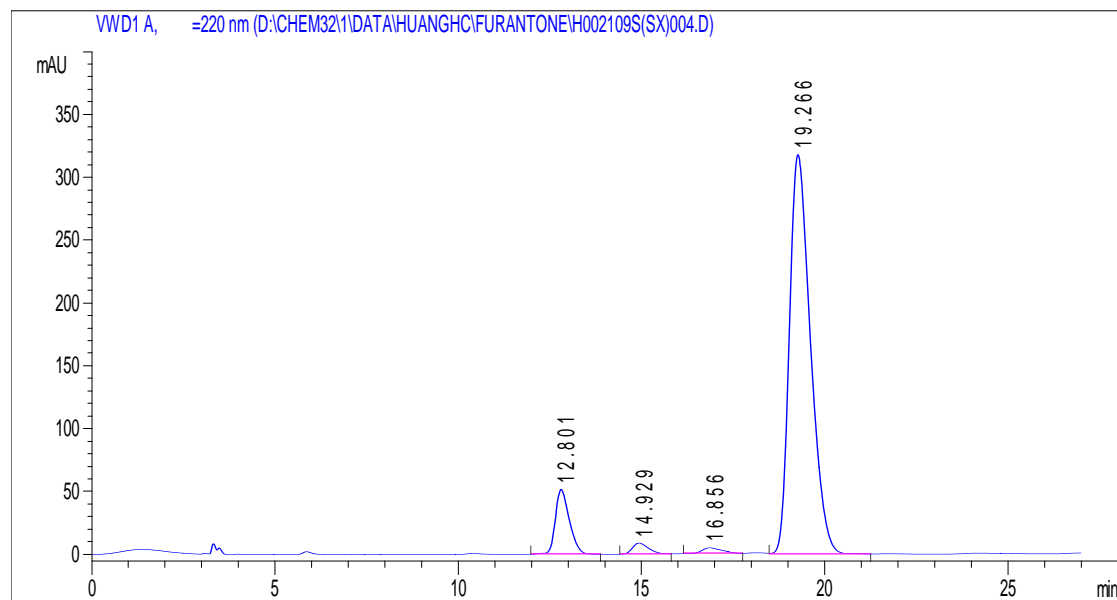

| # | Time   | Area   | Height | Width  | Symmetry | Area % |
|---|--------|--------|--------|--------|----------|--------|
| 1 | 12.801 | 1373.7 | 51.7   | 0.4032 | 0.676    | 9.472  |
| 2 | 14.929 | 279    | 8.9    | 0.4723 | 0.64     | 1.924  |
| 3 | 16.856 | 166.1  | 4.5    | 0.6127 | 0.608    | 1.145  |
| 4 | 19.266 | 12684  | 317.9  | 0.6112 | 0.655    | 87.459 |

**6t: 5-(2-oxoheptan-4-yl)furan-2(5H)-one**

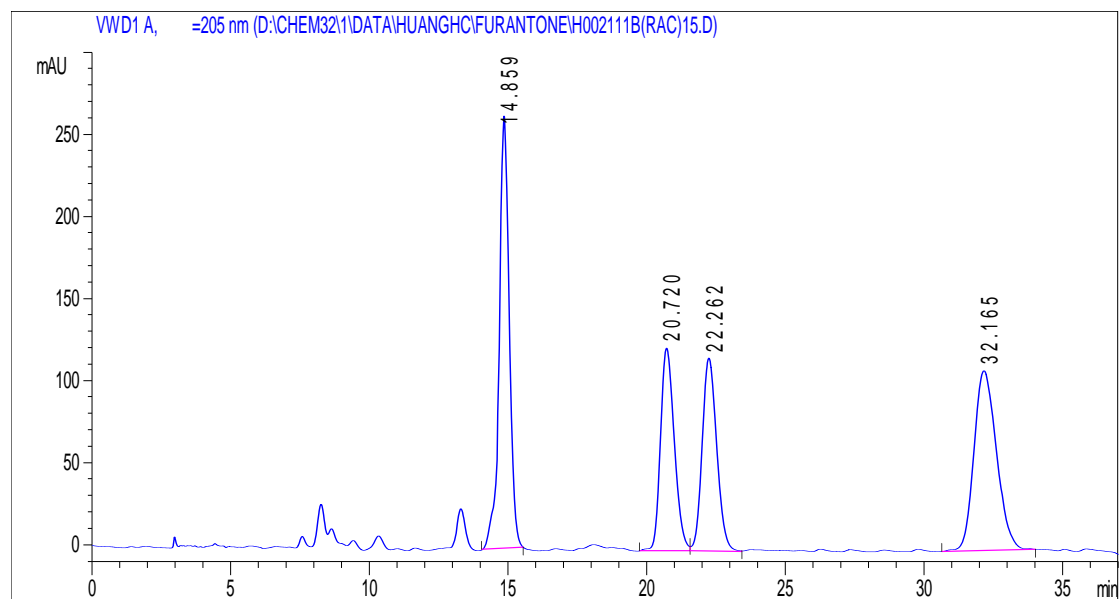

| # | Time   | Area   | Height | Width  | Symmetry | Area % |
|---|--------|--------|--------|--------|----------|--------|
| 1 | 14.859 | 6595   | 263.3  | 0.4174 | 0.927    | 30.803 |
| 2 | 20.72  | 4294   | 123.6  | 0.579  | 0.765    | 20.056 |
| 3 | 22.262 | 4305.6 | 47.1   | 1.4594 | 0        | 20.110 |
| 4 | 32.165 | 6215.6 | 109.6  | 0.9451 | 0.789    | 29.031 |

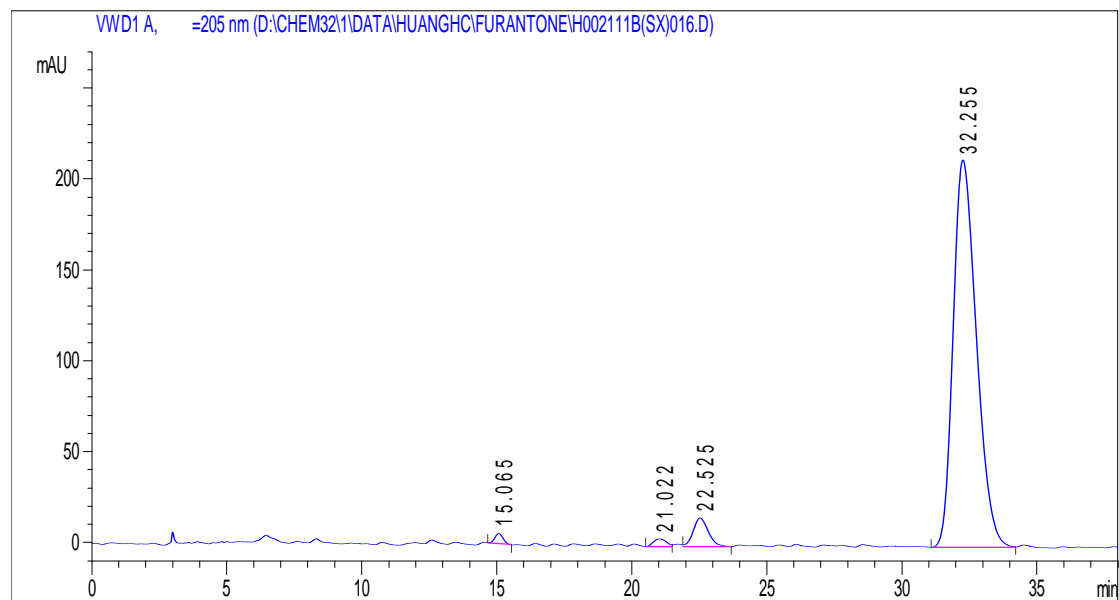

| # | Time   | Area    | Height | Width  | Symmetry | Area % |
|---|--------|---------|--------|--------|----------|--------|
| 1 | 15.065 | 116.4   | 5.6    | 0.348  | 0.916    | 0.851  |
| 2 | 21.022 | 148.9   | 4.4    | 0.5653 | 0.888    | 1.088  |
| 3 | 22.525 | 632.5   | 16     | 0.6011 | 0.817    | 4.624  |
| 4 | 32.255 | 12781.1 | 213.3  | 0.9319 | 0.691    | 93.436 |



**6u: 5-(2-oxooctan-4-yl)furan-2(5H)-one**

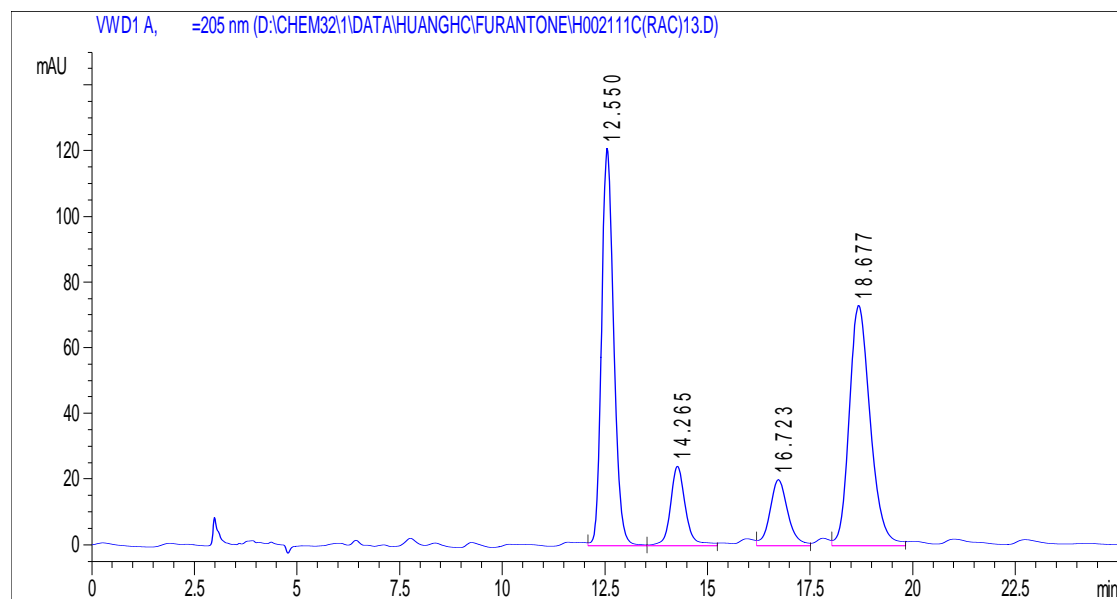

| # | Time   | Area   | Height | Width  | Symmetry | Area % |
|---|--------|--------|--------|--------|----------|--------|
| 1 | 12.55  | 2505.8 | 121.1  | 0.32   | 0.781    | 39.436 |
| 2 | 14.265 | 624.5  | 24.3   | 0.3871 | 0.815    | 9.828  |
| 3 | 16.723 | 612.1  | 20.2   | 0.4589 | 0.848    | 9.634  |
| 4 | 18.677 | 2611.6 | 73.2   | 0.55   | 0.756    | 41.102 |

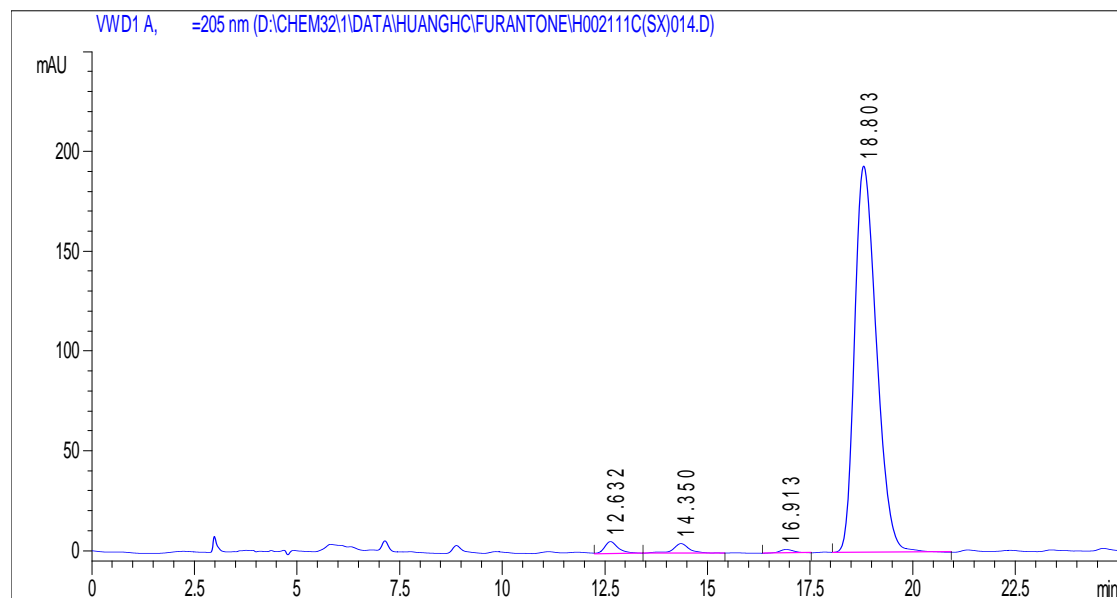

| # | Time   | Area   | Height | Width  | Symmetry | Area % |
|---|--------|--------|--------|--------|----------|--------|
| 1 | 12.632 | 149    | 6.1    | 0.3576 | 0.659    | 1.974  |
| 2 | 14.35  | 157.6  | 5      | 0.4592 | 0.995    | 2.089  |
| 3 | 16.913 | 48.5   | 1.8    | 0.401  | 0.754    | 0.643  |
| 4 | 18.803 | 7191.9 | 193.7  | 0.5758 | 0.673    | 95.295 |

**6v: 5-(2-oxononan-4-yl)furan-2(5H)-one**

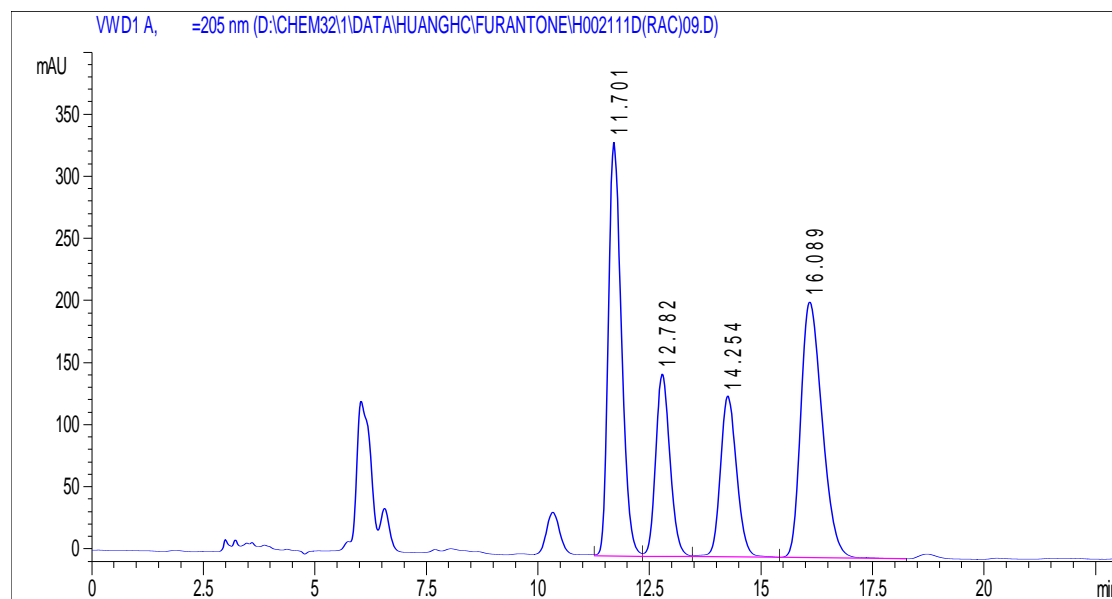

| # | Time   | Area   | Height | Width  | Symmetry | Area % |
|---|--------|--------|--------|--------|----------|--------|
| 1 | 11.701 | 6858.3 | 333.6  | 0.3214 | 0.711    | 33.659 |
| 2 | 12.782 | 3295.6 | 147.3  | 0.3454 | 0.803    | 16.174 |
| 3 | 14.254 | 3339.9 | 130.1  | 0.3985 | 0.814    | 16.391 |
| 4 | 16.089 | 6882.2 | 206.2  | 0.5176 | 0.675    | 33.776 |

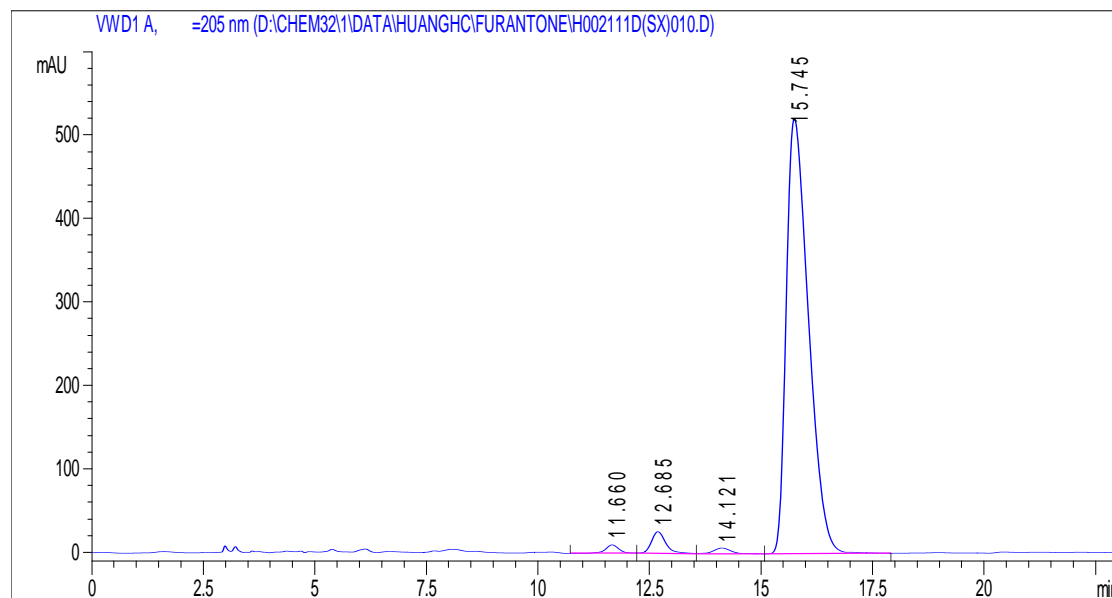

| # | Time   | Area    | Height | Width  | Symmetry | Area % |
|---|--------|---------|--------|--------|----------|--------|
| 1 | 11.66  | 254.4   | 10.6   | 0.3492 | 1.053    | 1.331  |
| 2 | 12.685 | 615     | 26.5   | 0.3524 | 0.768    | 3.217  |
| 3 | 14.121 | 193     | 7      | 0.4237 | 0.96     | 1.09   |
| 4 | 15.745 | 18055.9 | 521.7  | 0.5377 | 0.539    | 94.443 |

**6w: 5-(2-oxodecan-4-yl)furan-2(5H)-one**

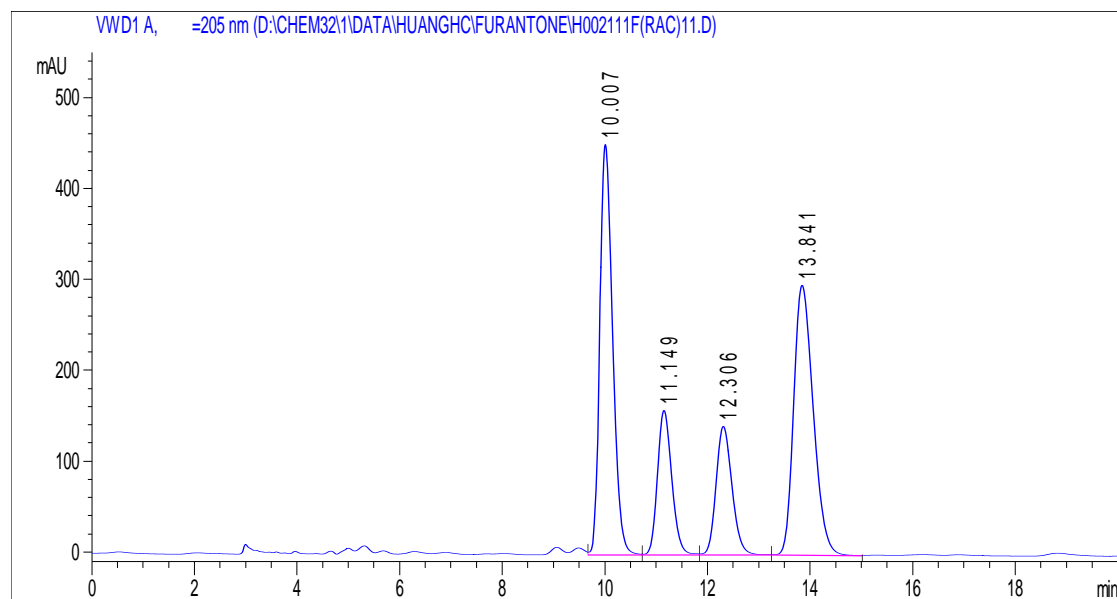

| # | Time   | Area   | Height | Width  | Symmetry | Area % |
|---|--------|--------|--------|--------|----------|--------|
| 1 | 10.007 | 7838   | 451.5  | 0.2695 | 0.721    | 35.736 |
| 2 | 11.149 | 3109.4 | 159.3  | 0.3034 | 0.794    | 14.177 |
| 3 | 12.306 | 3103.7 | 142    | 0.3365 | 0.793    | 14.151 |
| 4 | 13.841 | 7882   | 297.4  | 0.4141 | 0.716    | 35.937 |

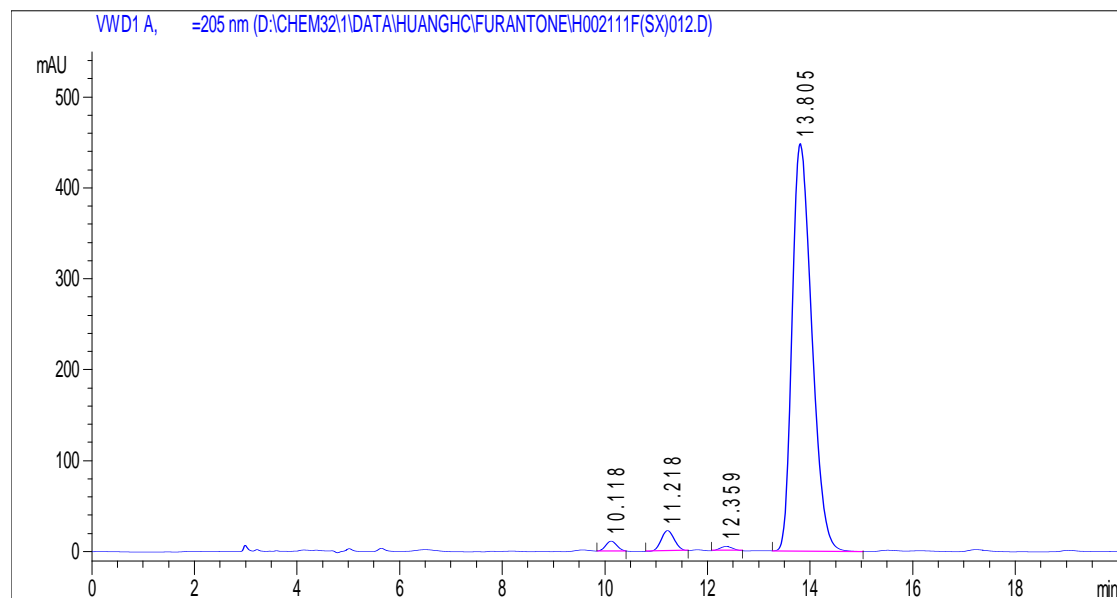

| # | Time   | Area    | Height | Width  | Symmetry | Area % |
|---|--------|---------|--------|--------|----------|--------|
| 1 | 10.118 | 164.1   | 10.9   | 0.2502 | 0.875    | 1.300  |
| 2 | 11.218 | 406.8   | 22.6   | 0.2995 | 0.925    | 3.222  |
| 3 | 12.359 | 86.6    | 4.8    | 0.3006 | 0.922    | 0.686  |
| 4 | 13.805 | 11967.4 | 448.6  | 0.4149 | 0        | 94.792 |

**6x: 5-(4-oxooctan-2-yl)furan-2(5H)-one**

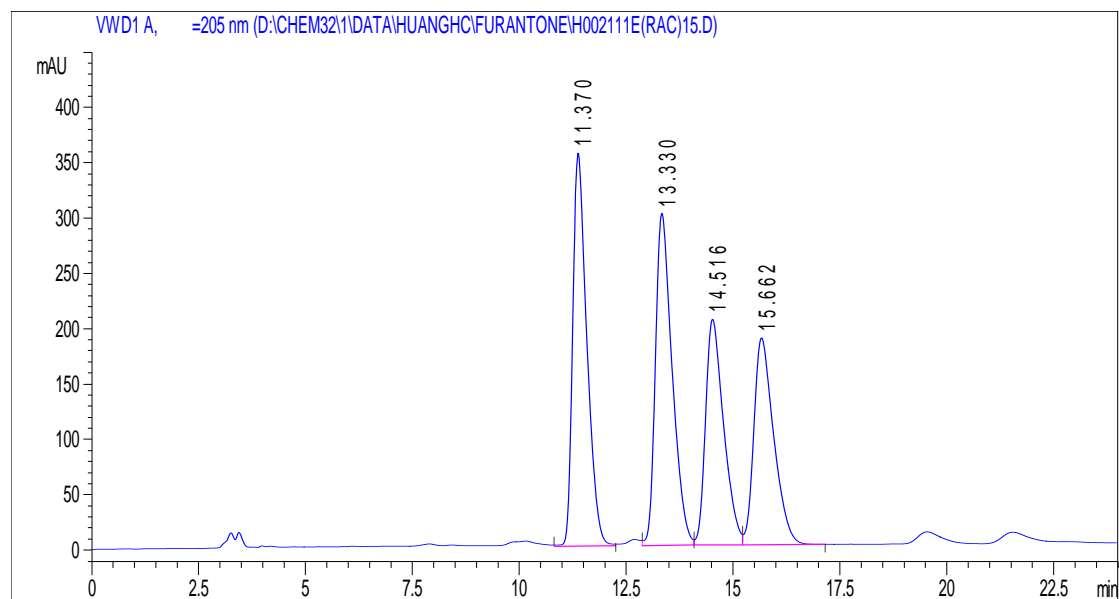

| # | Time   | Area   | Height | Width  | Symmetry | Area % |
|---|--------|--------|--------|--------|----------|--------|
| 1 | 11.37  | 8177.1 | 355.3  | 0.3413 | 0.577    | 28.736 |
| 2 | 13.33  | 8174.5 | 300.4  | 0.4048 | 0.593    | 28.727 |
| 3 | 14.516 | 6027.6 | 204.3  | 0.4402 | 0.602    | 21.183 |
| 4 | 15.662 | 6076.4 | 187.3  | 0.4862 | 0.599    | 21.354 |

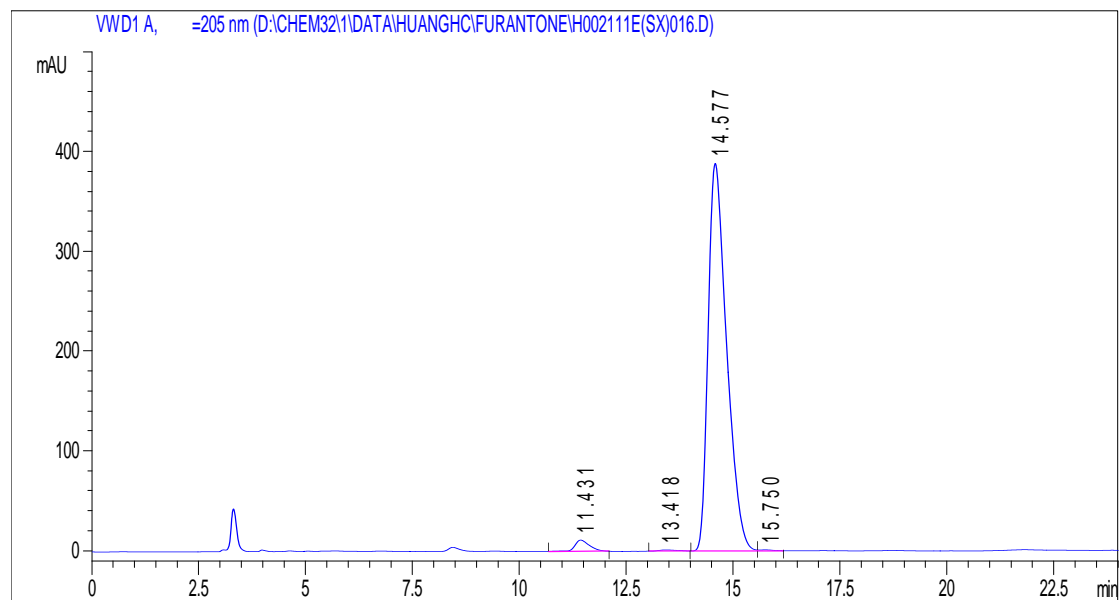

| # | Time   | Area    | Height | Width  | Symmetry | Area % |
|---|--------|---------|--------|--------|----------|--------|
| 1 | 11.431 | 288.5   | 11.5   | 0.4174 | 0.716    | 2.400  |
| 2 | 13.418 | 39.6    | 1.3    | 0.5203 | 0.592    | 0.329  |
| 3 | 14.577 | 11662.1 | 388.5  | 0.4657 | 0        | 97.031 |
| 4 | 15.75  | 28.8    | 1.2    | 0.3976 | 0.657    | 0.240  |

**6y: 5-(5-oxo-1-phenylhexan-3-yl)furan-2(5H)-one**

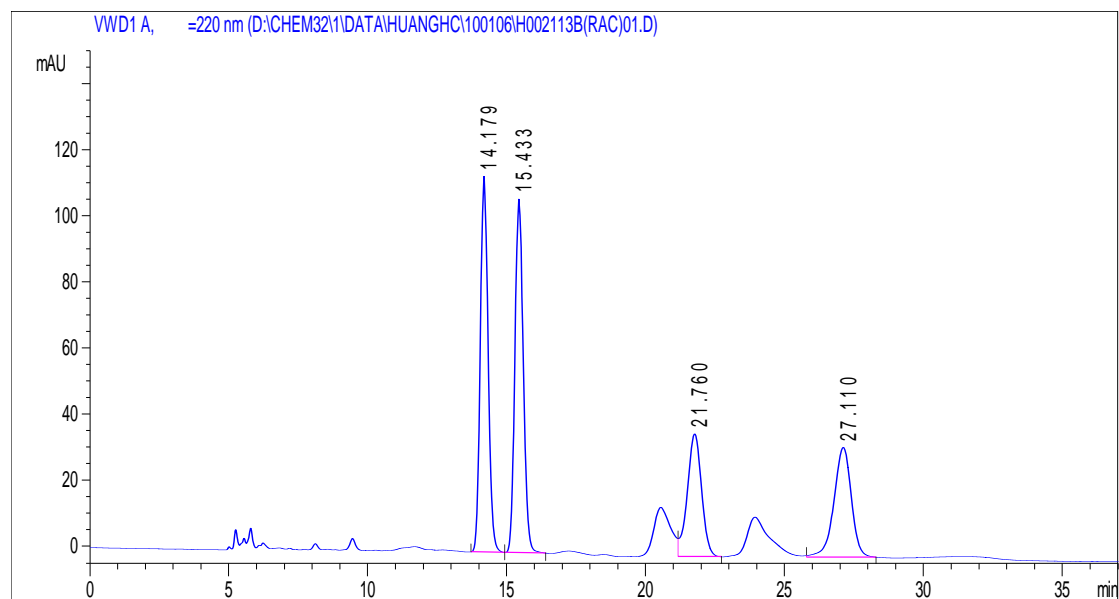

| # | Time   | Area   | Height | Width  | Symmetry | Area % |
|---|--------|--------|--------|--------|----------|--------|
| 1 | 14.179 | 2234.1 | 113.7  | 0.305  | 0.876    | 30.748 |
| 2 | 15.433 | 2253.9 | 107    | 0.3288 | 0.867    | 31.020 |
| 3 | 21.76  | 1325   | 37.2   | 0.5469 | 1.032    | 18.235 |
| 4 | 27.11  | 1453   | 33.3   | 0.6712 | 1.149    | 19.997 |

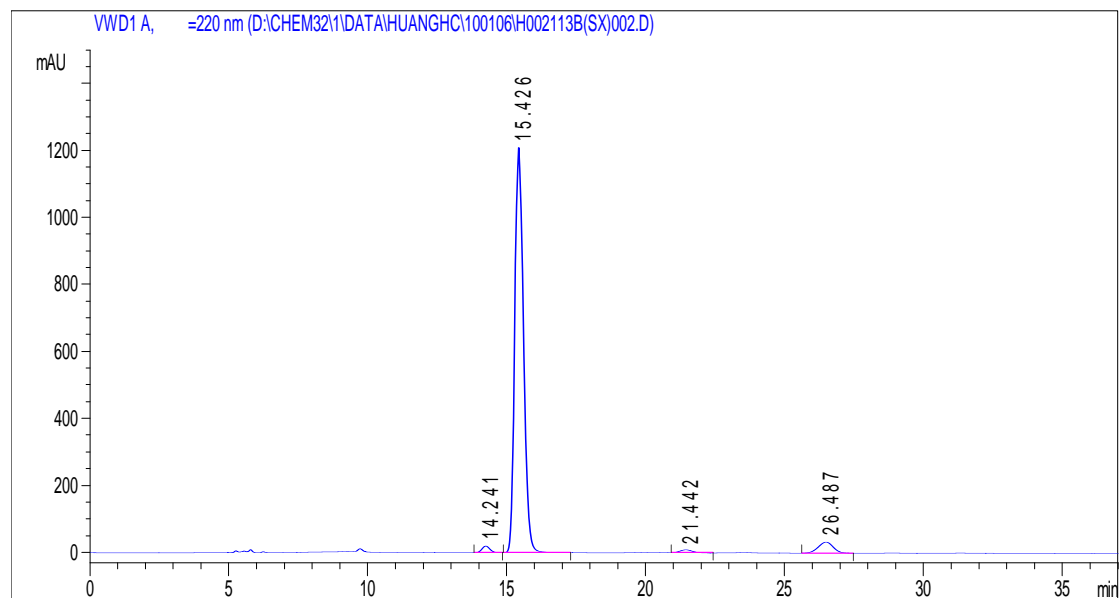

| # | Time   | Area   | Height | Width  | Symmetry | Area % |
|---|--------|--------|--------|--------|----------|--------|
| 1 | 14.241 | 388.7  | 19.7   | 0.3054 | 0.878    | 1.364  |
| 2 | 15.426 | 26570  | 1209.1 | 0.3437 | 0.773    | 93.238 |
| 3 | 21.442 | 304.4  | 9.3    | 0.4984 | 0.937    | 1.068  |
| 4 | 26.487 | 1233.9 | 33     | 0.582  | 1.062    | 4.330  |

**7a:5-(3-oxocyclopentyl)furan-2(5H)-one**

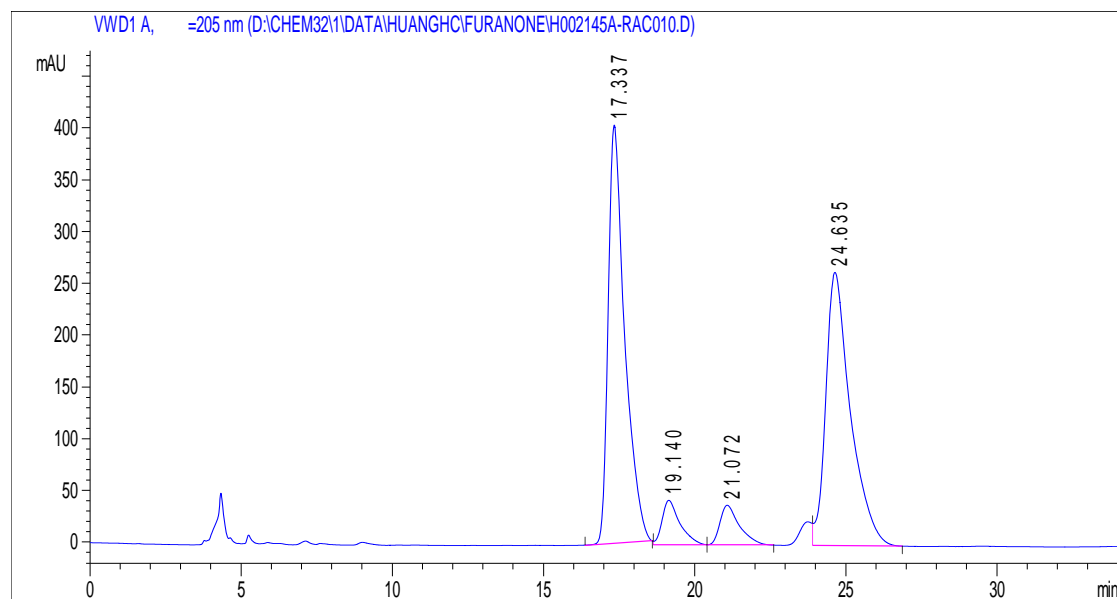

| # | Time   | Area    | Height | Width  | Symmetry | Area % |
|---|--------|---------|--------|--------|----------|--------|
| 1 | 17.337 | 15372.1 | 403.8  | 0.6345 | 0.56     | 45.372 |
| 2 | 19.14  | 1802.7  | 43.4   | 0.6064 | 0.566    | 5.321  |
| 3 | 21.072 | 1743.1  | 38.6   | 0.6604 | 0.558    | 5.145  |
| 4 | 24.635 | 14962.5 | 264    | 0.8273 | 0.554    | 44.163 |

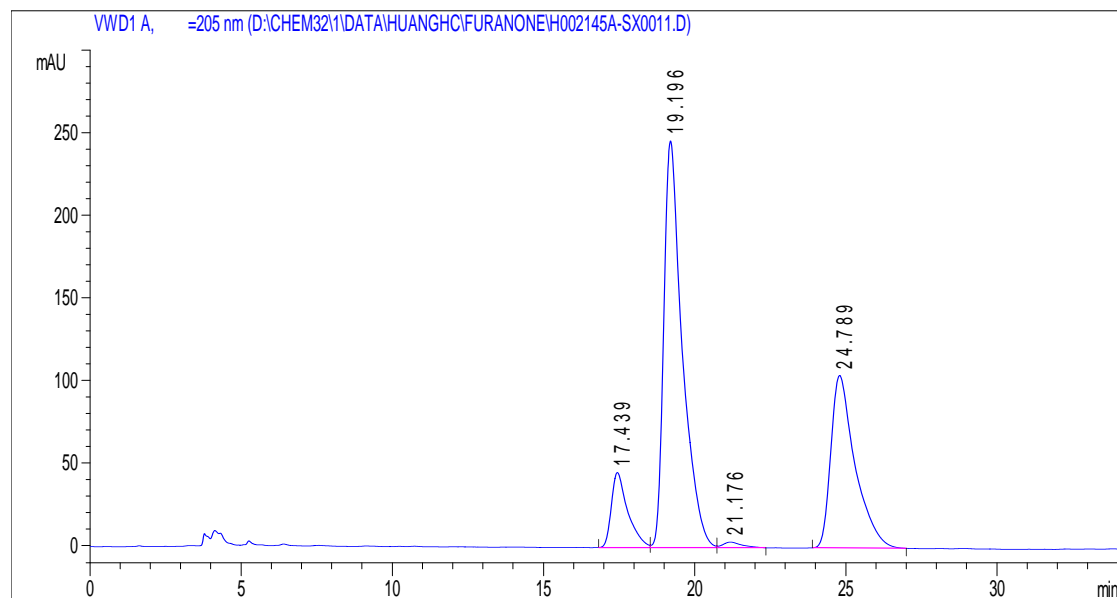

| # | Time   | Area    | Height | Width  | Symmetry | Area % |
|---|--------|---------|--------|--------|----------|--------|
| 1 | 17.439 | 1717.1  | 45.4   | 0.55   | 0.538    | 9.460  |
| 2 | 19.196 | 10477.3 | 246.1  | 0.622  | 0.523    | 57.720 |
| 3 | 21.176 | 155.1   | 3.5    | 0.6428 | 0.573    | 0.854  |
| 4 | 24.789 | 5802.3  | 104.3  | 0.8133 | 0.53     | 31.966 |

**7b:5-(3-oxocycloheptyl)furan-2(5H)-one**

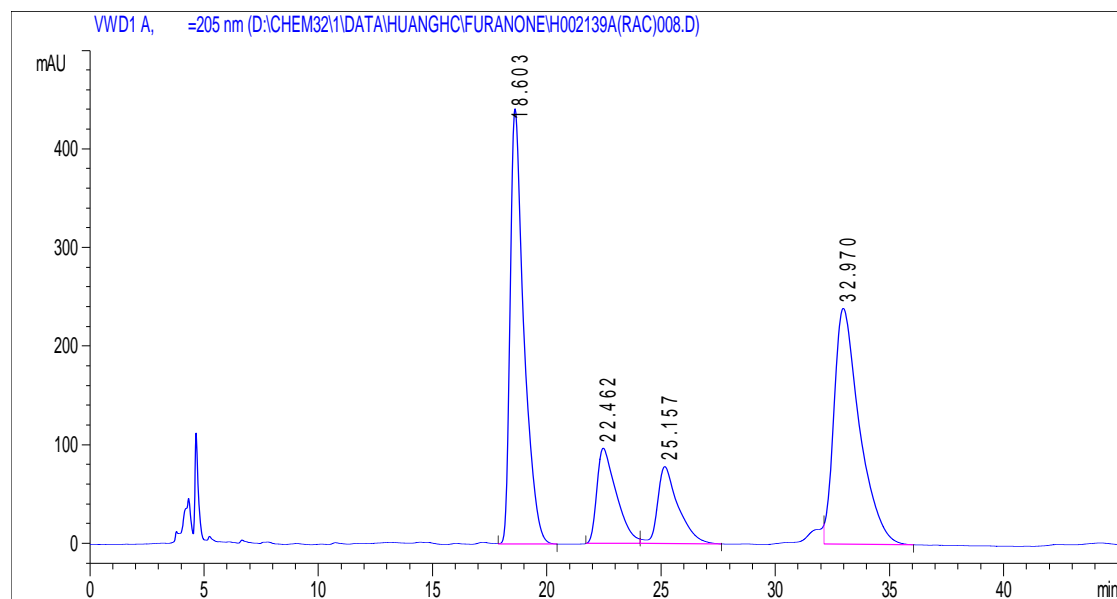

| # | Time   | Area    | Height | Width  | Symmetry | Area % |
|---|--------|---------|--------|--------|----------|--------|
| 1 | 18.603 | 18412.2 | 441.6  | 0.6131 | 0.513    | 38.621 |
| 2 | 22.462 | 5710    | 96.7   | 0.9845 | 0.471    | 11.977 |
| 3 | 25.157 | 4929.9  | 78.3   | 1.0495 | 0.528    | 10.341 |
| 4 | 32.97  | 18621.7 | 239.7  | 1.2948 | 0.551    | 39.061 |

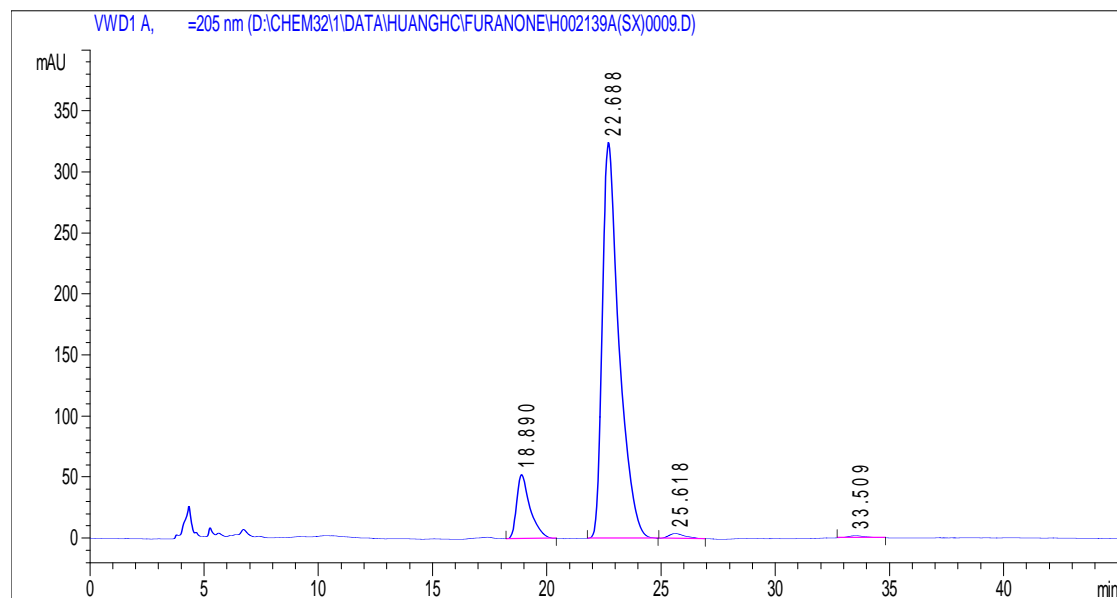

| # | Time   | Area    | Height | Width  | Symmetry | Area % |
|---|--------|---------|--------|--------|----------|--------|
| 1 | 18.89  | 2155.3  | 52.6   | 0.597  | 0.545    | 11.343 |
| 2 | 22.688 | 16525.9 | 324.5  | 0.7471 | 0.527    | 86.974 |
| 3 | 25.618 | 218.5   | 4.2    | 0.7348 | 0.649    | 1.150  |
| 4 | 33.509 | 101.3   | 1.8    | 0.6664 | 0.687    | 0.533  |

## F: NMR Spectra of Michael Addition Products

### 6a: 5-(3-oxo-1-phenylbutyl)furan-2(5H)-one

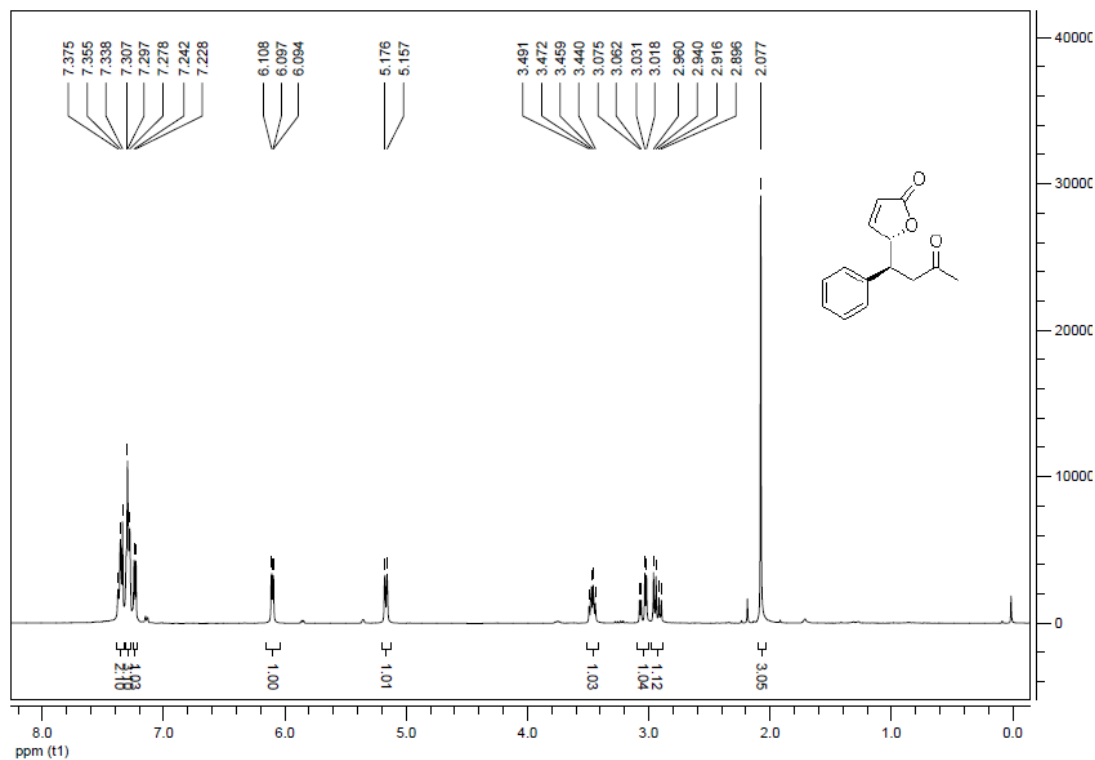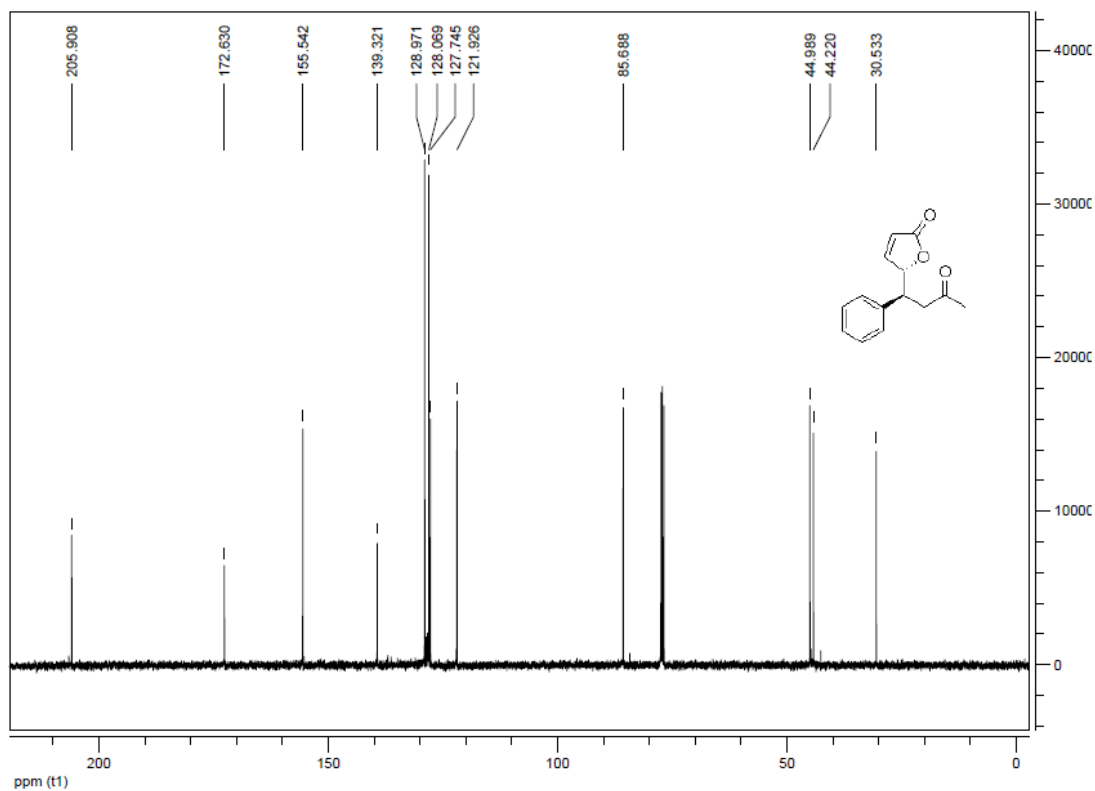



**6b: 5-(3-oxo-1-phenylbutyl)furan-2(5H)-one**

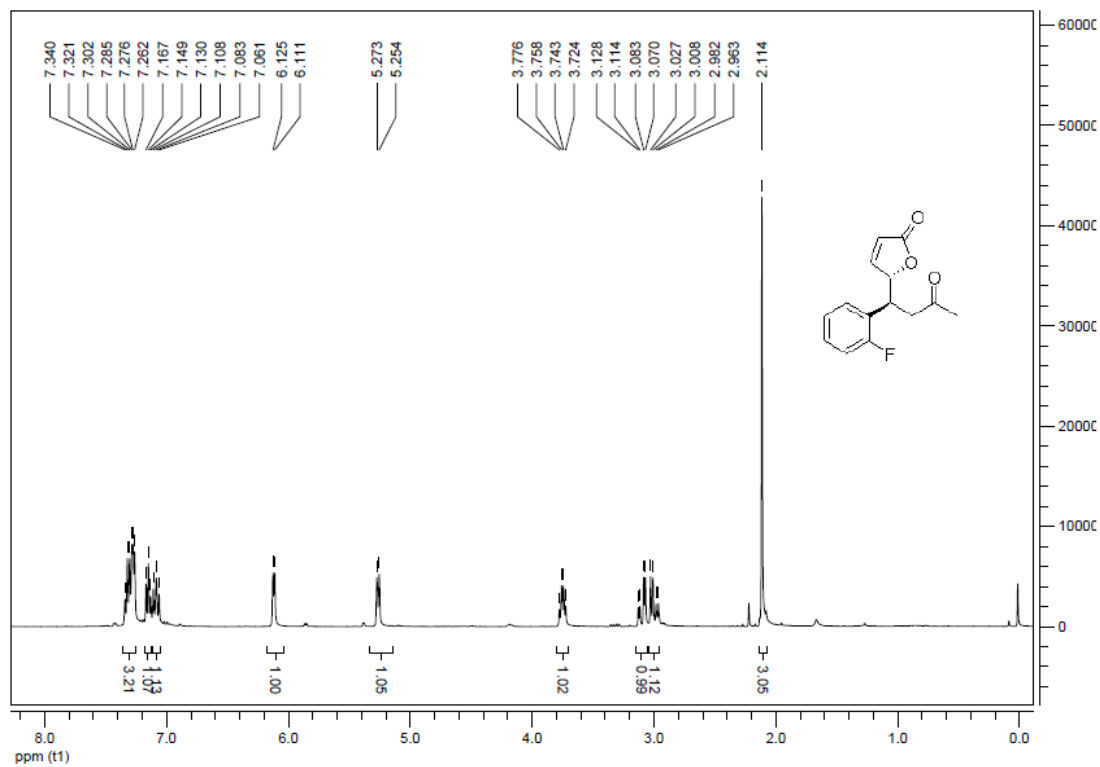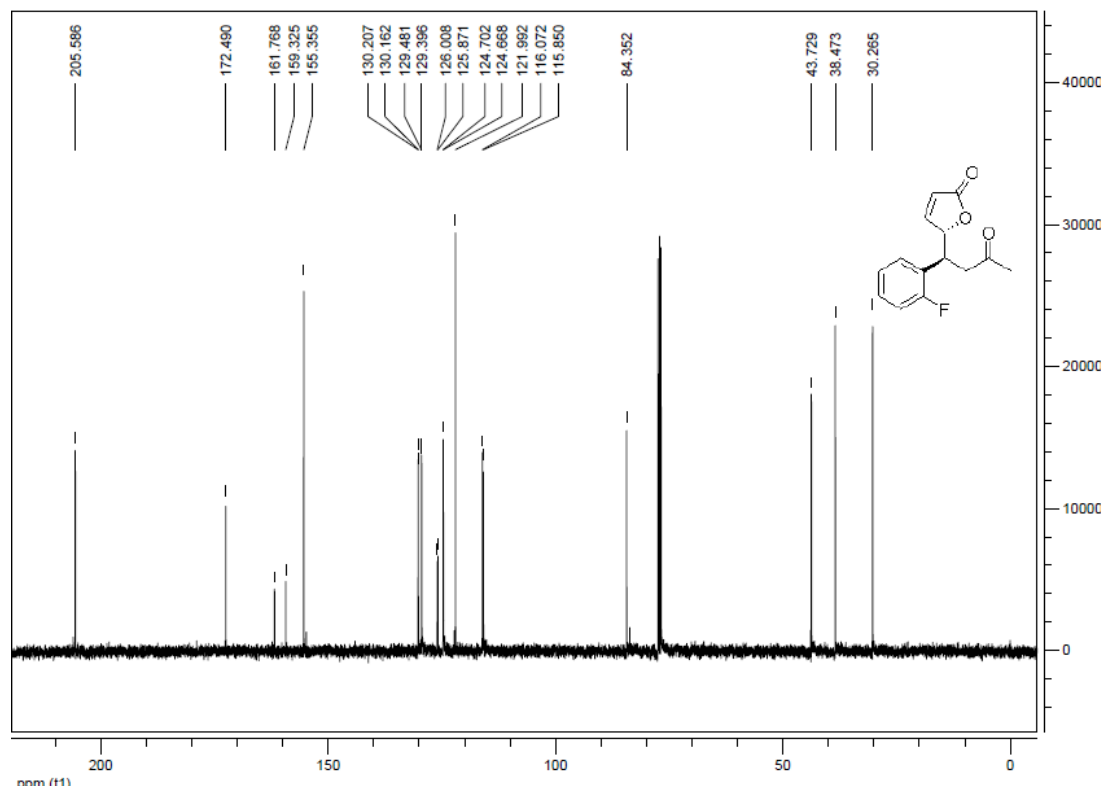

**6c: 5-(3-oxo-1-phenylbutyl)furan-2(5H)-one**

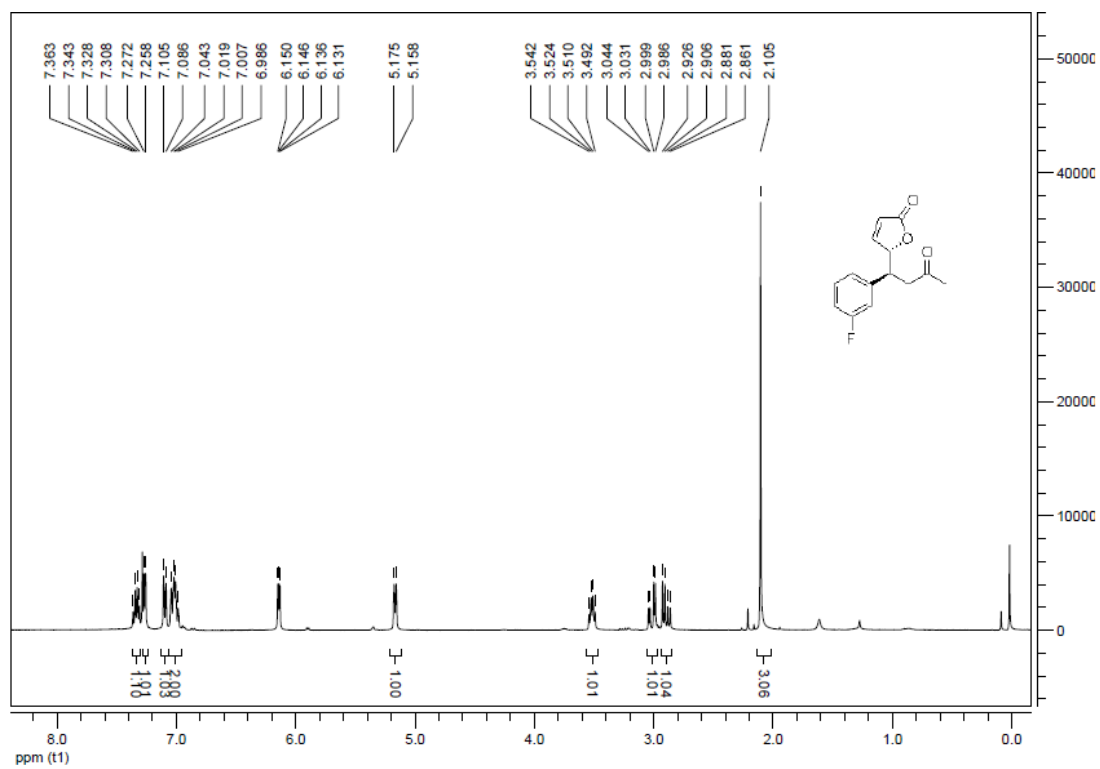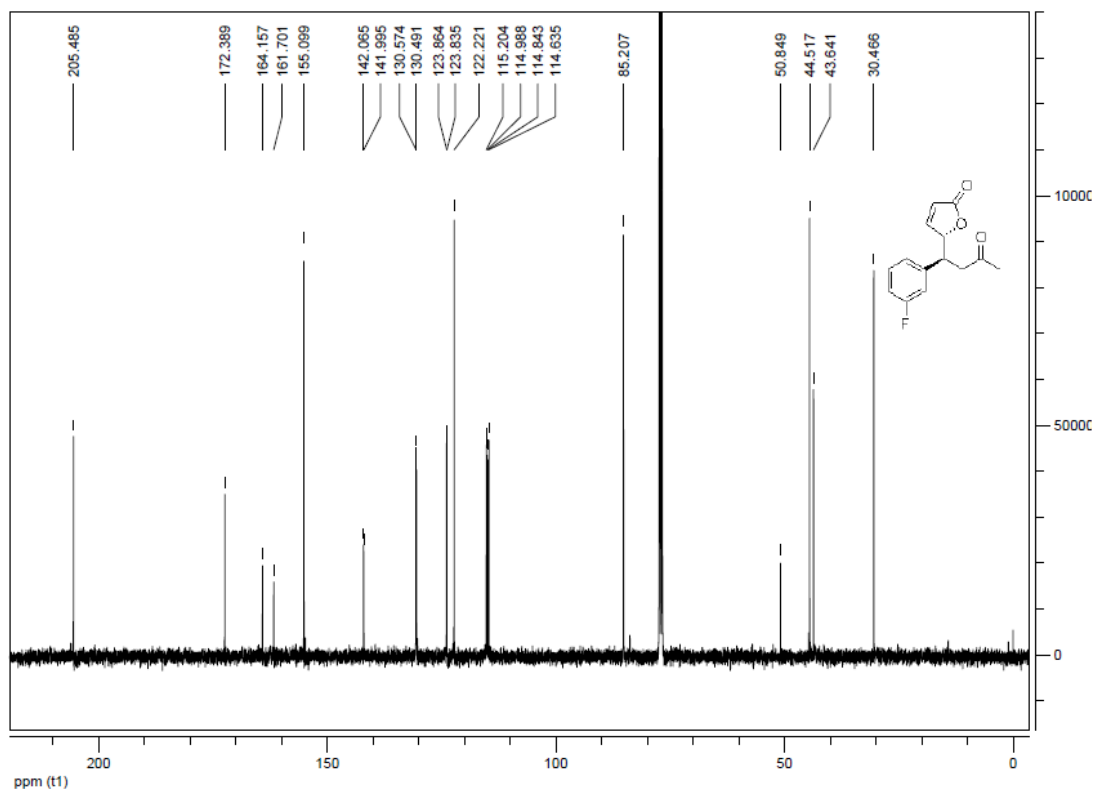

**6d: 5-(1-(4-fluorophenyl)-3-oxobutyl)furan-2(5H)-one**

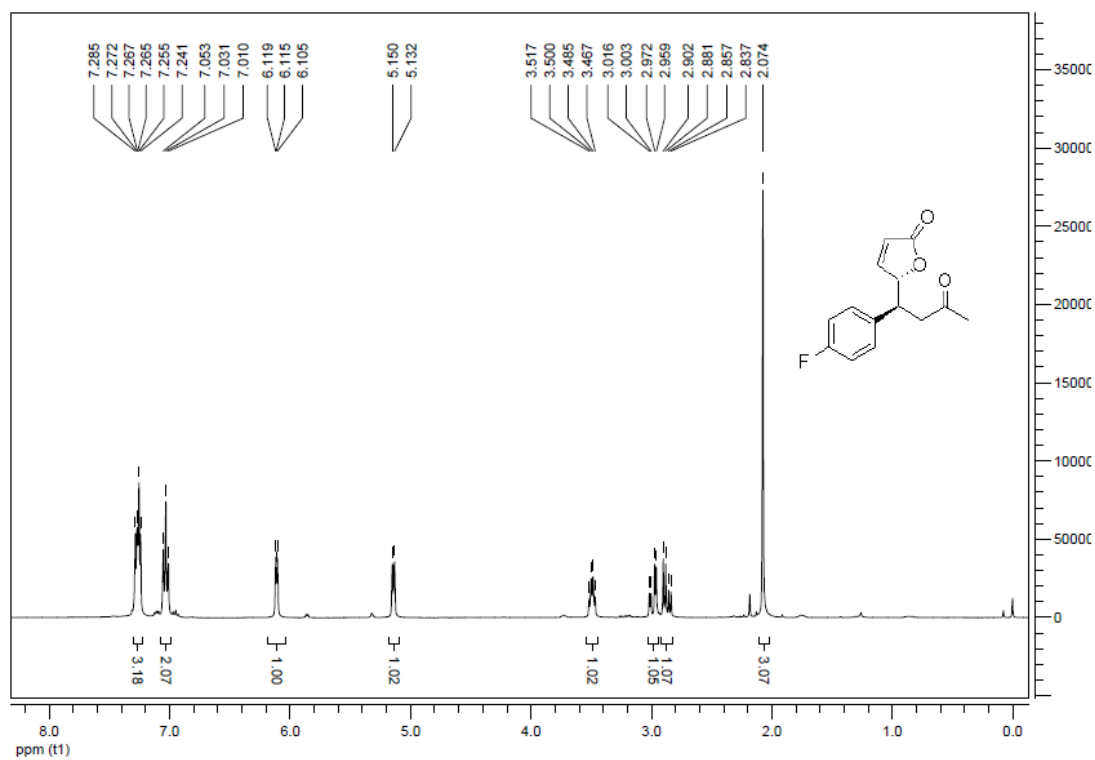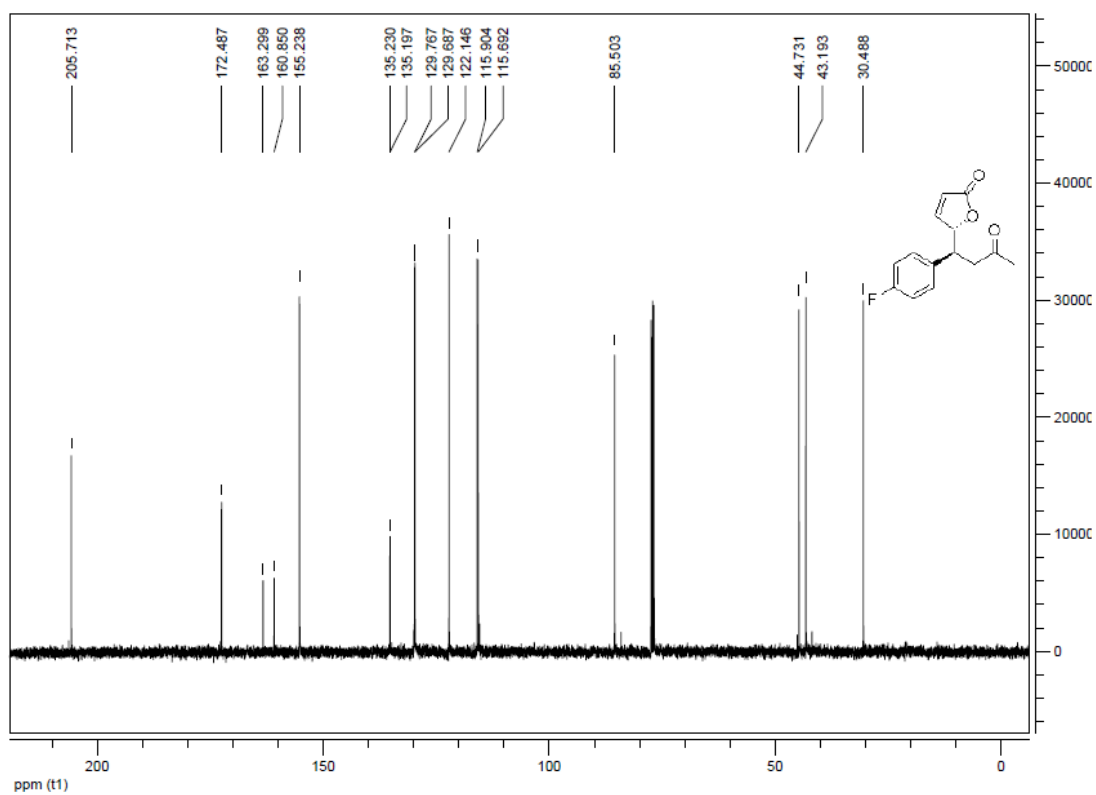

**6e: 5-(1-(2-chlorophenyl)-3-oxobutyl)furan-2(5H)-one**

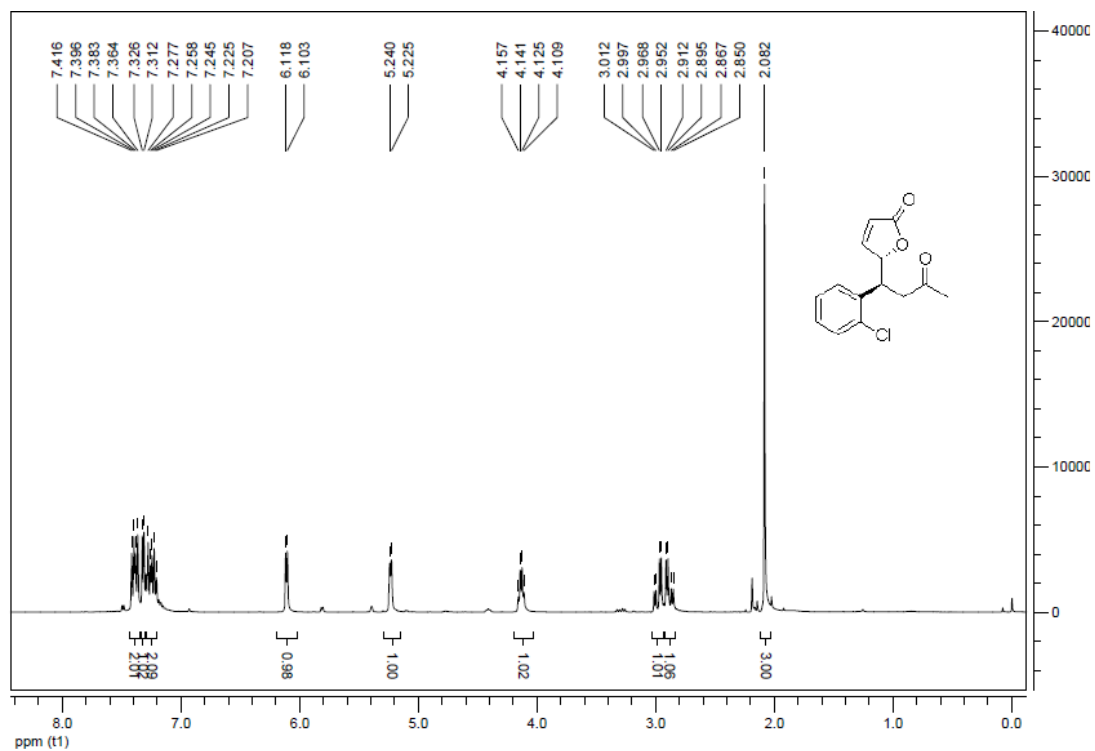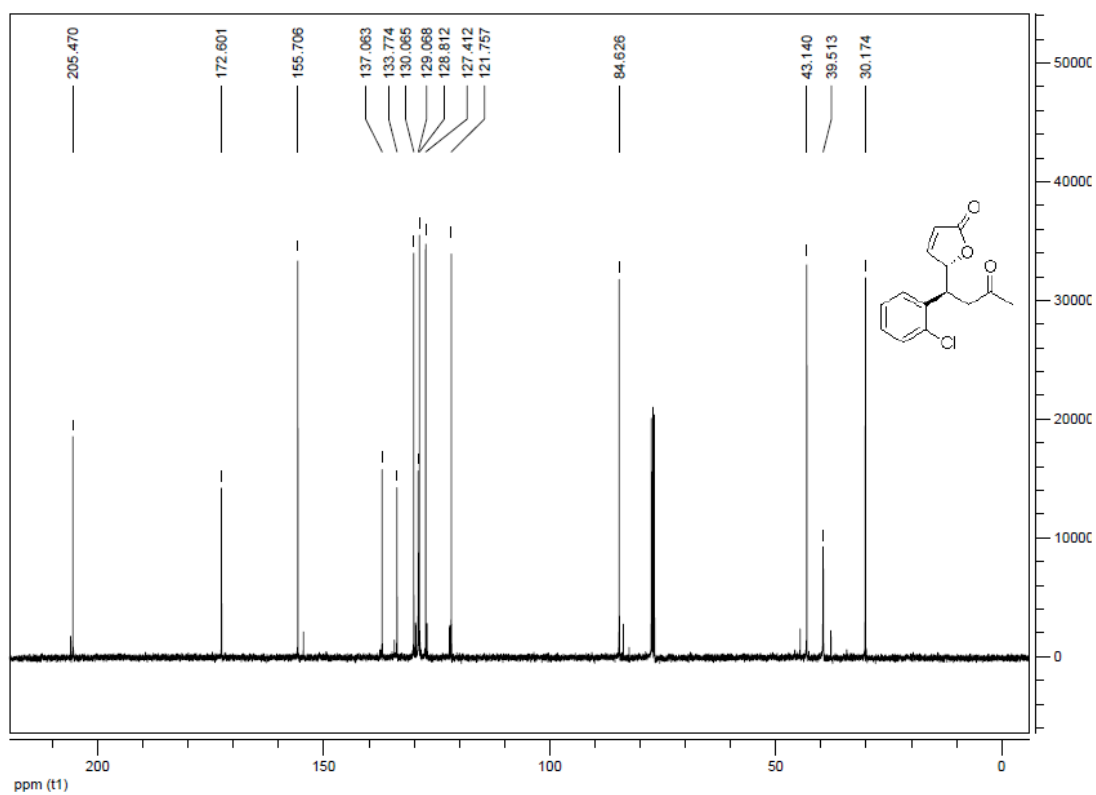

**6f: 5-(1-(3-chlorophenyl)-3-oxobutyl)furan-2(5H)-one**

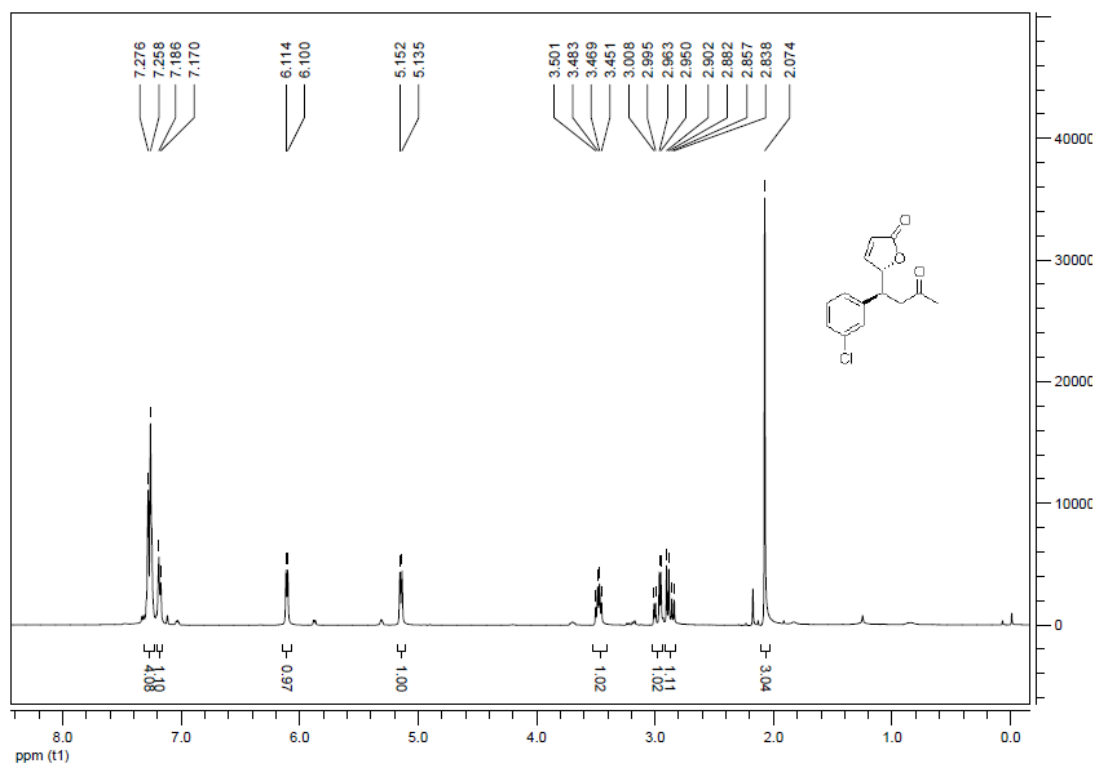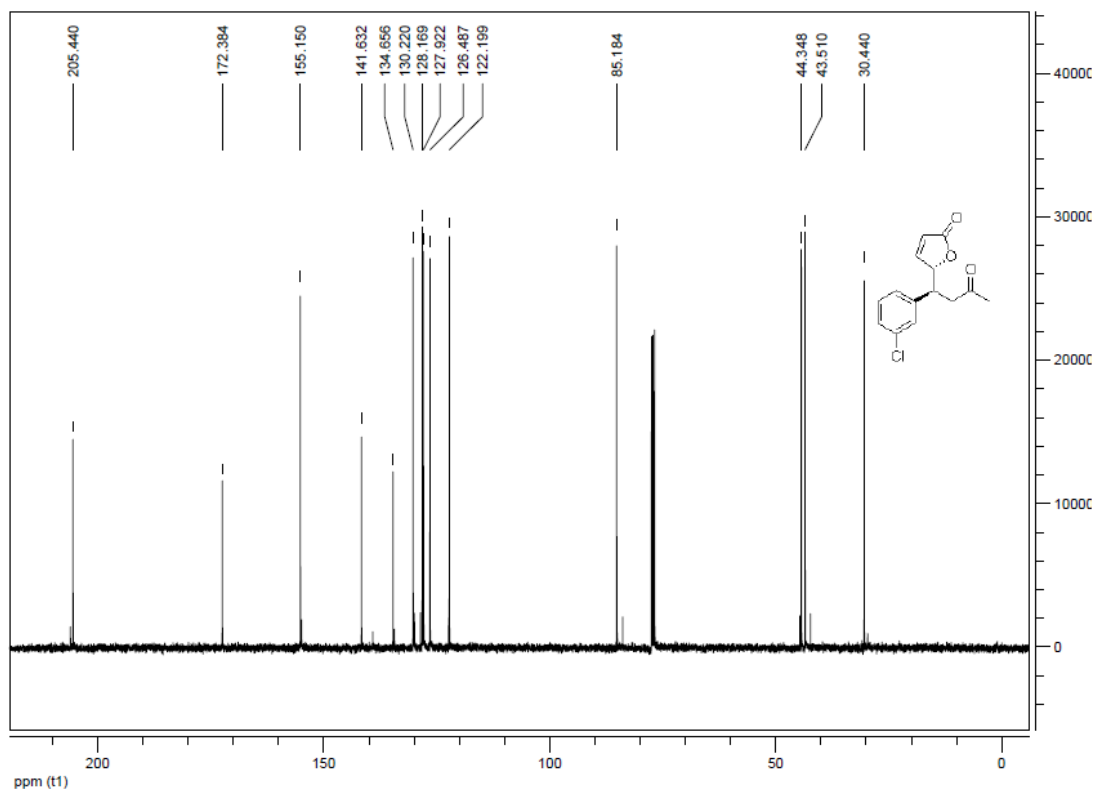

**6g: 5-(1-(3-bromophenyl)-3-oxobutyl)furan-2(5H)-one**

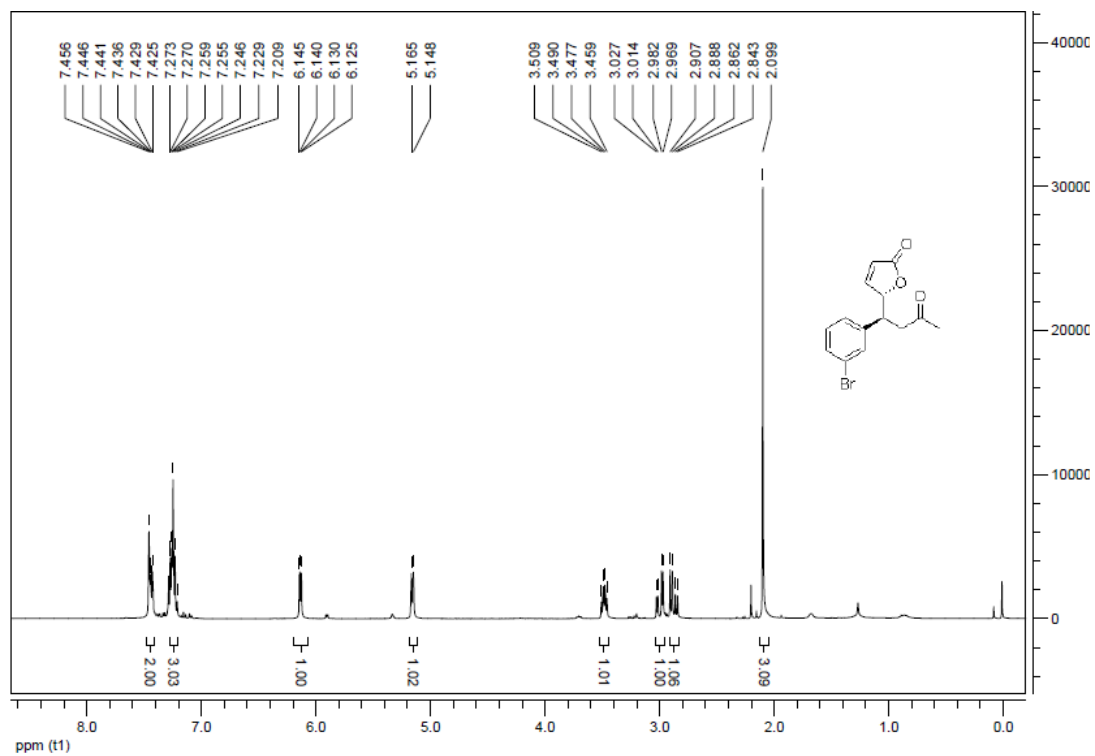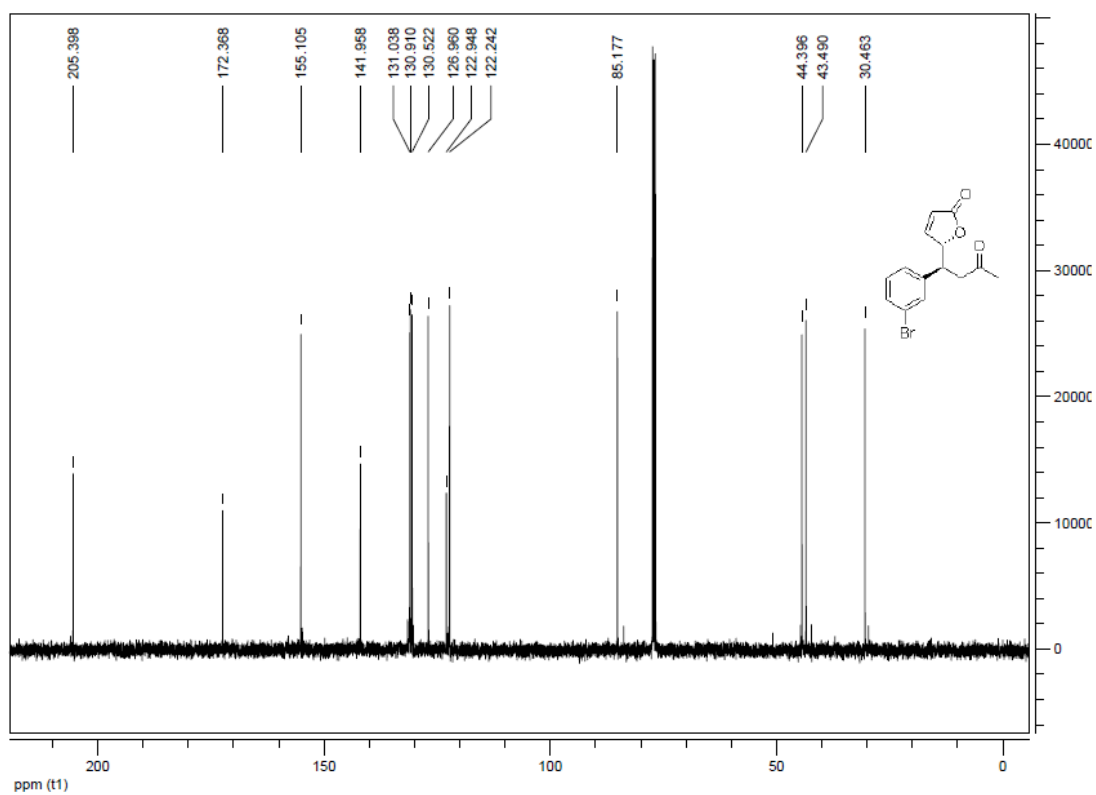

**6h: 5-(1-(4-bromophenyl)-3-oxobutyl)furan-2(5H)-one**

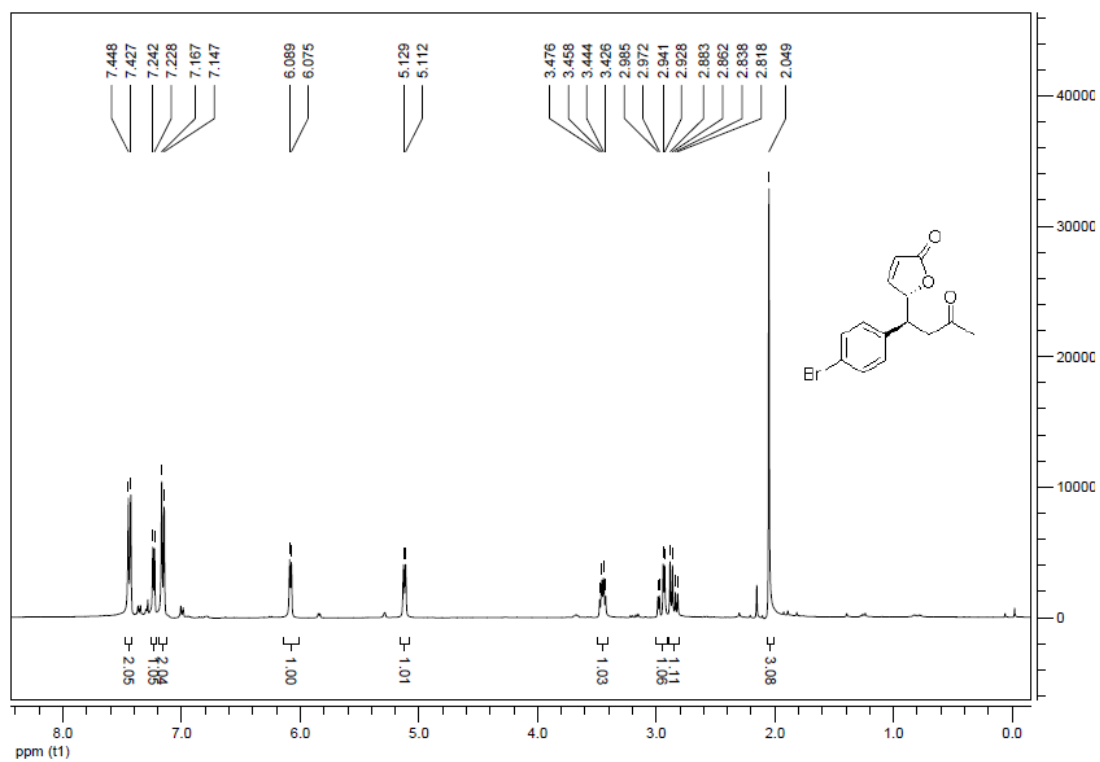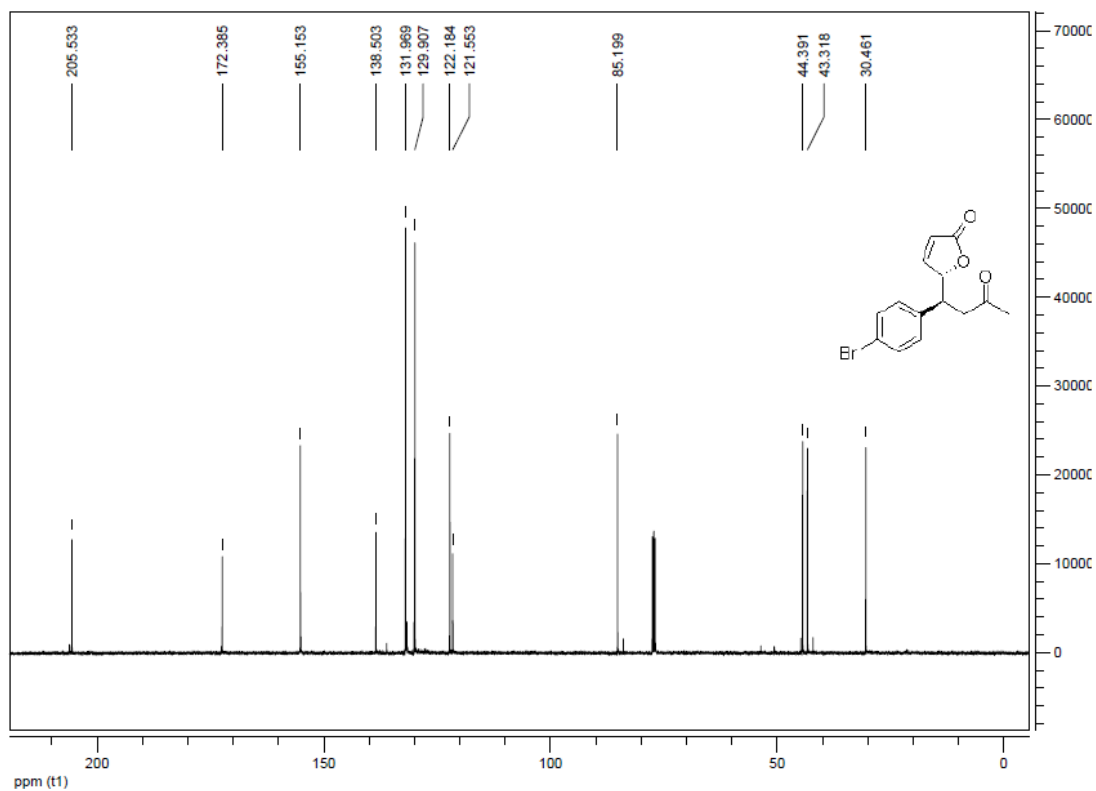

**6i: 5-(1-(2-methoxyphenyl)-3-oxobutyl)furan-2(5H)-one**

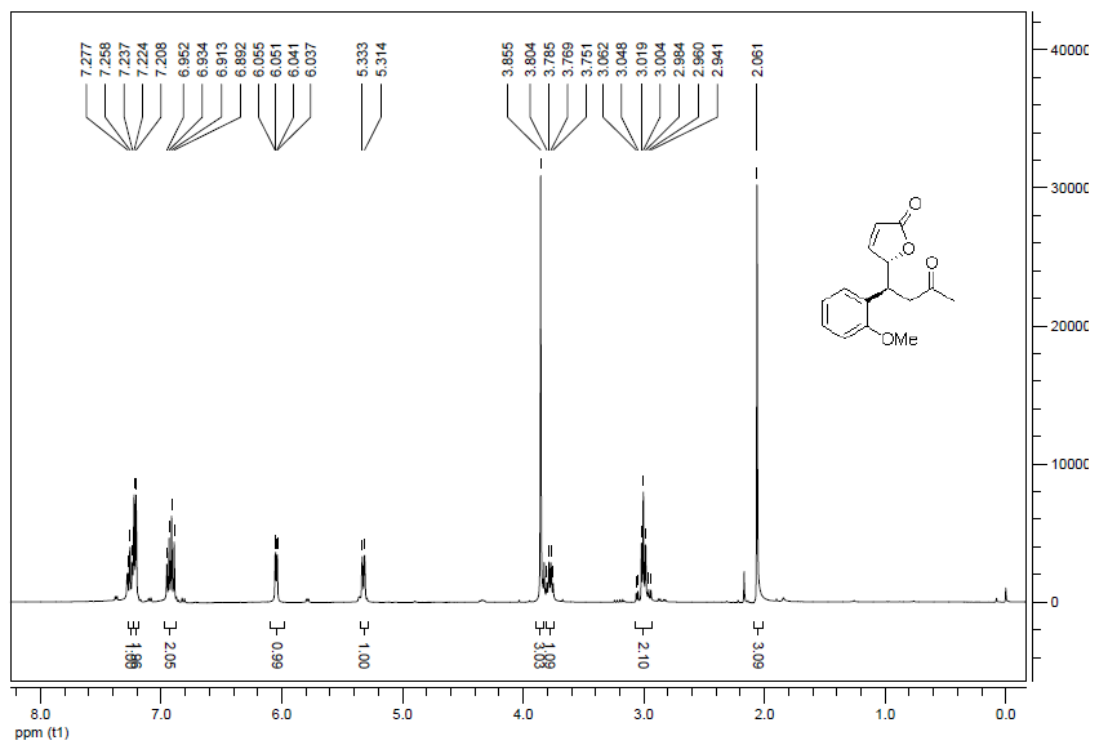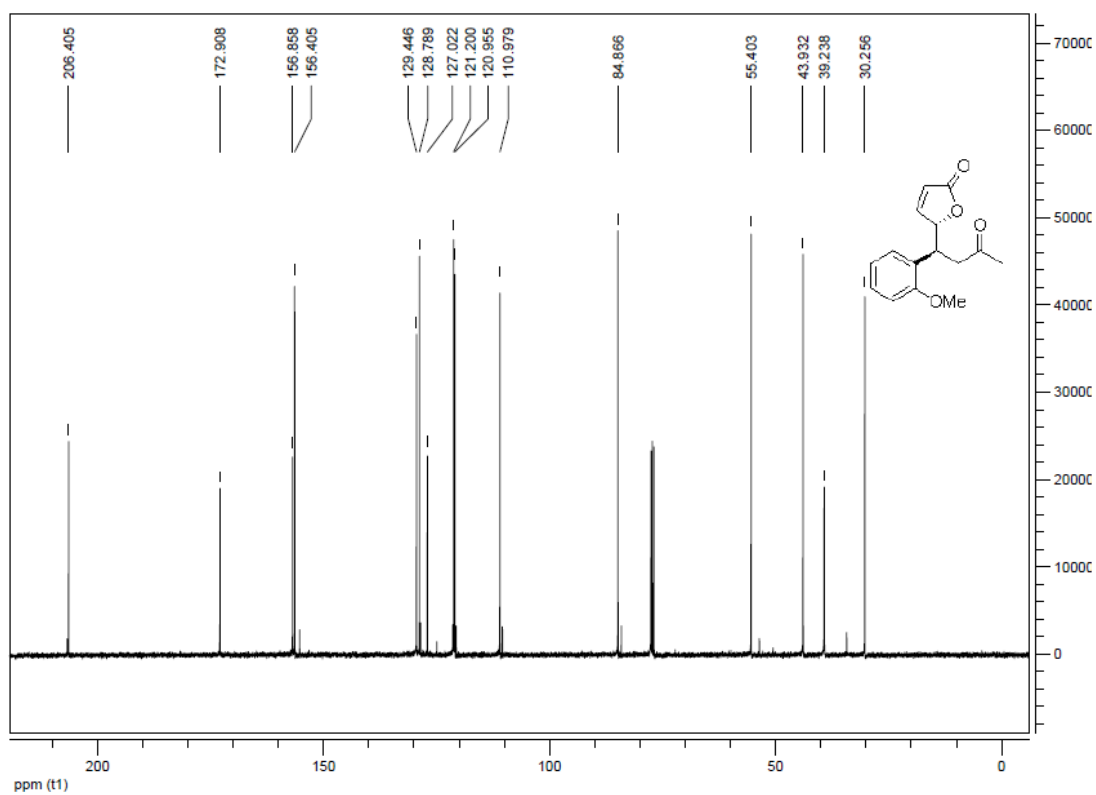



**6j: 5-(1-(2-methoxyphenyl)-3-oxobutyl)furan-2(5H)-one**

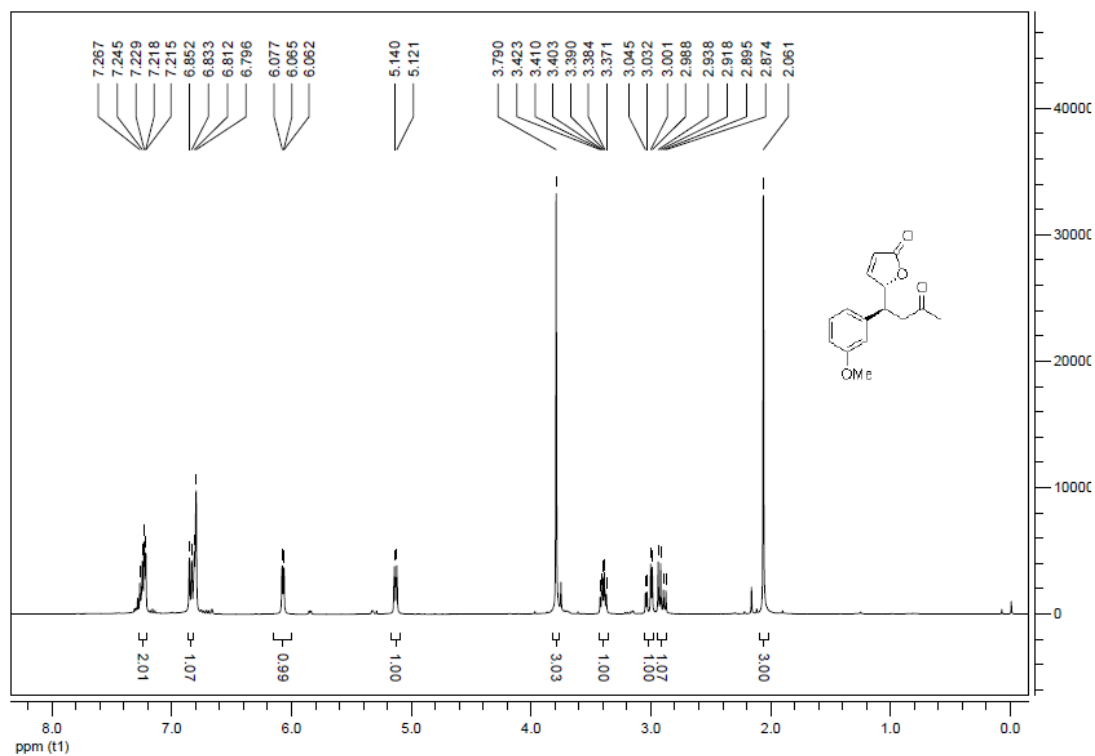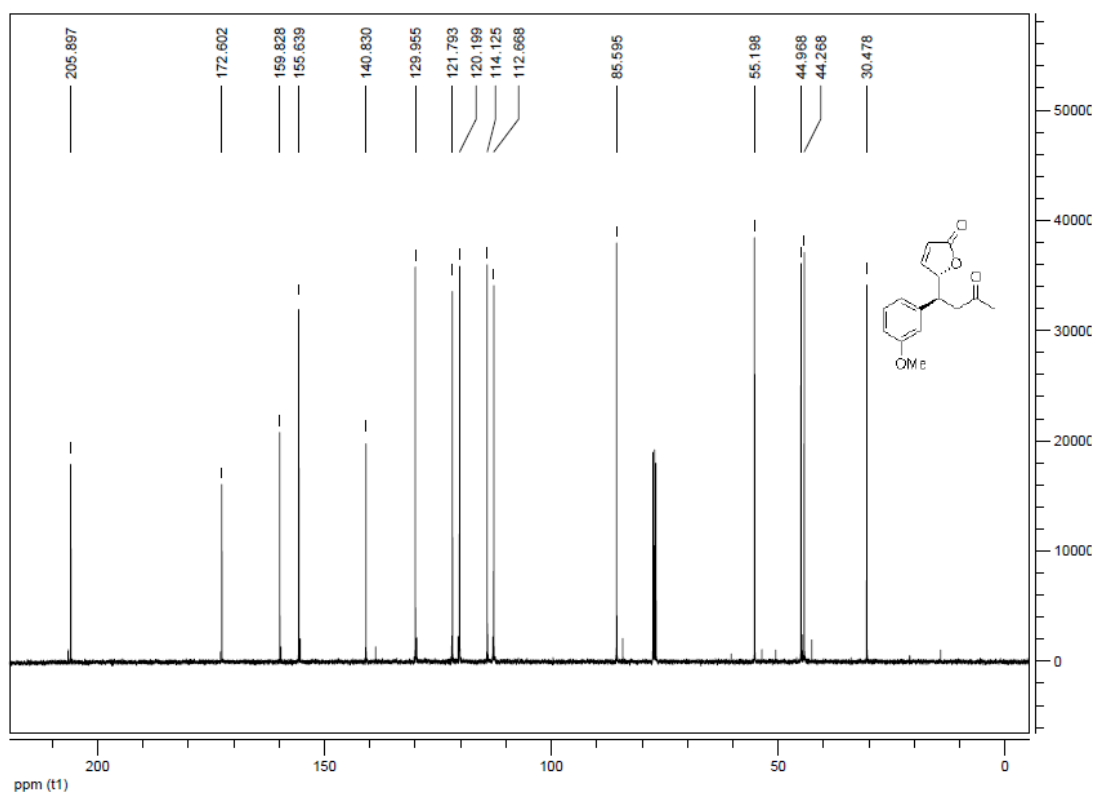

**6k: 5-(1-(4-methoxyphenyl)-3-oxobutyl)furan-2(5H)-one**

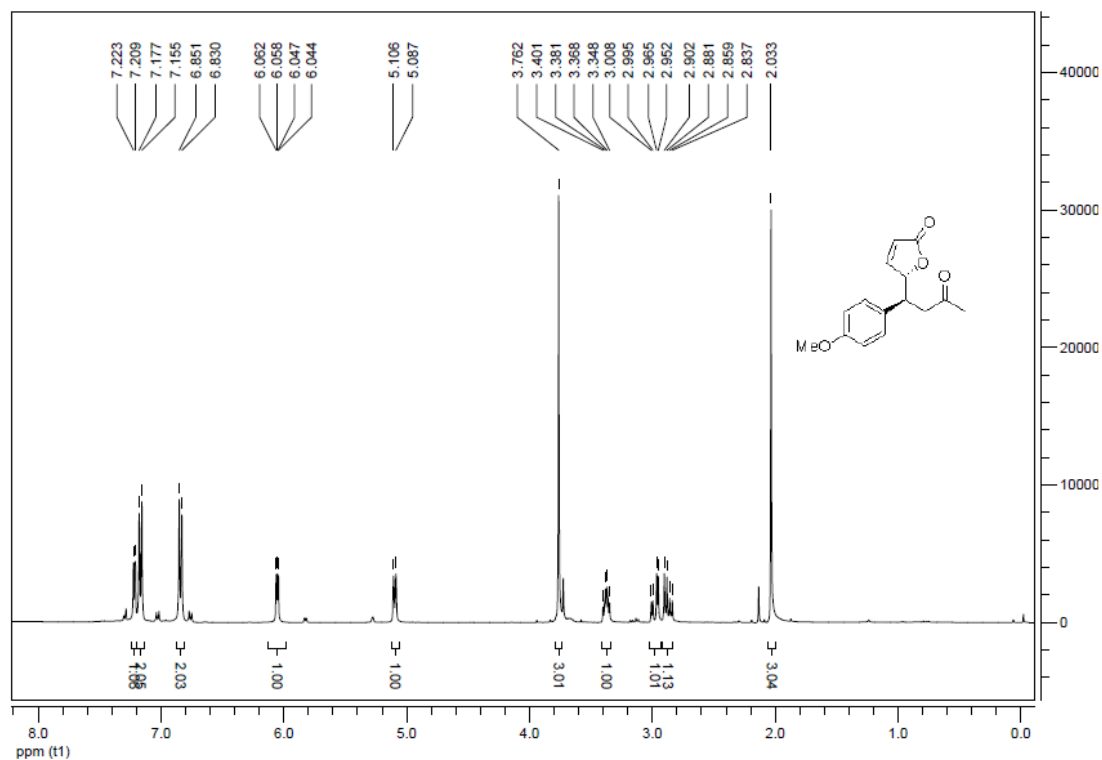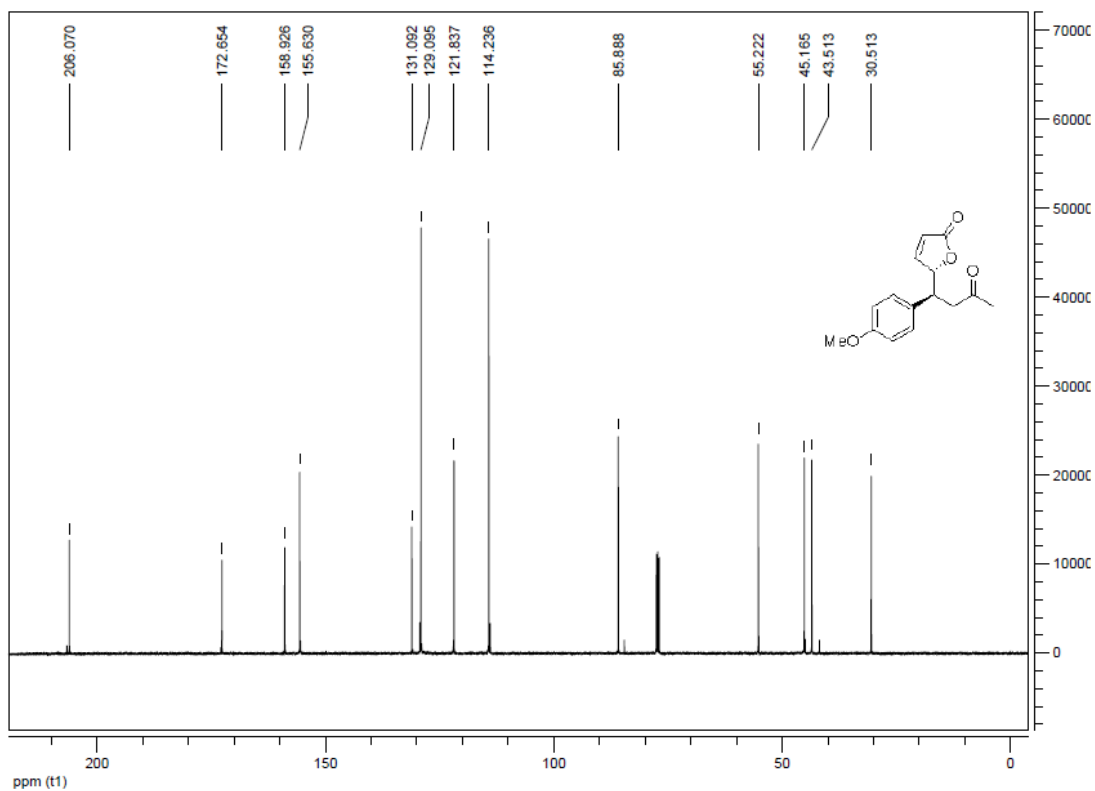

**6l: 5-(3-oxo-1-*m*-tolylbutyl)furan-2(5*H*)-one**

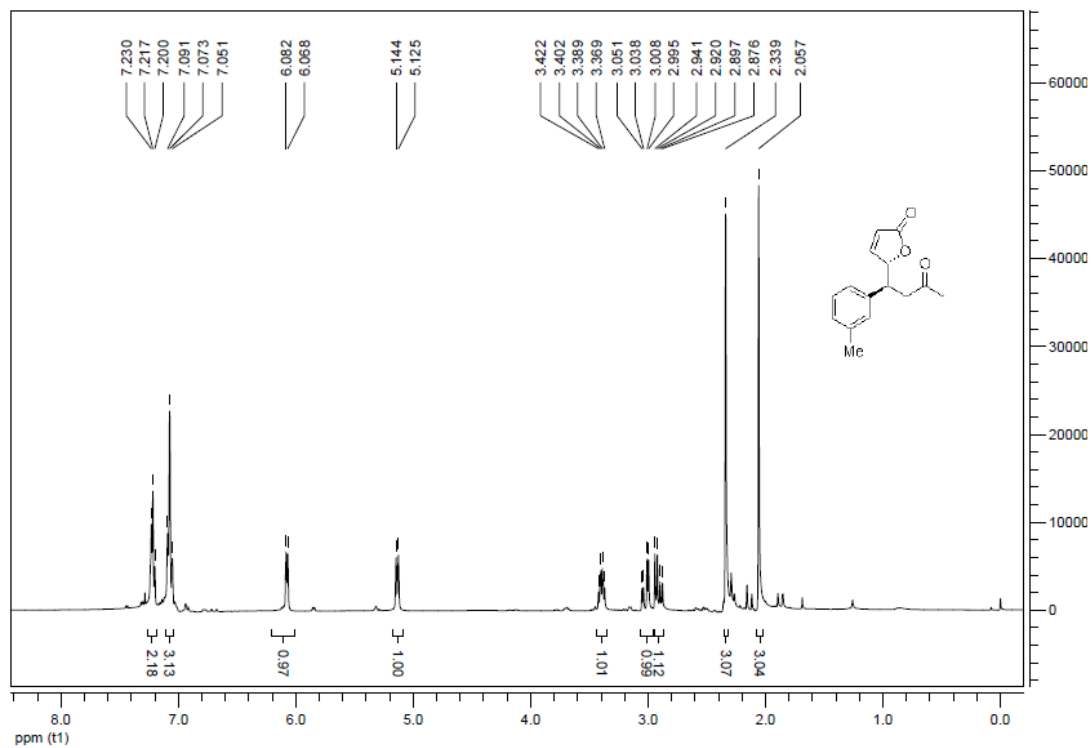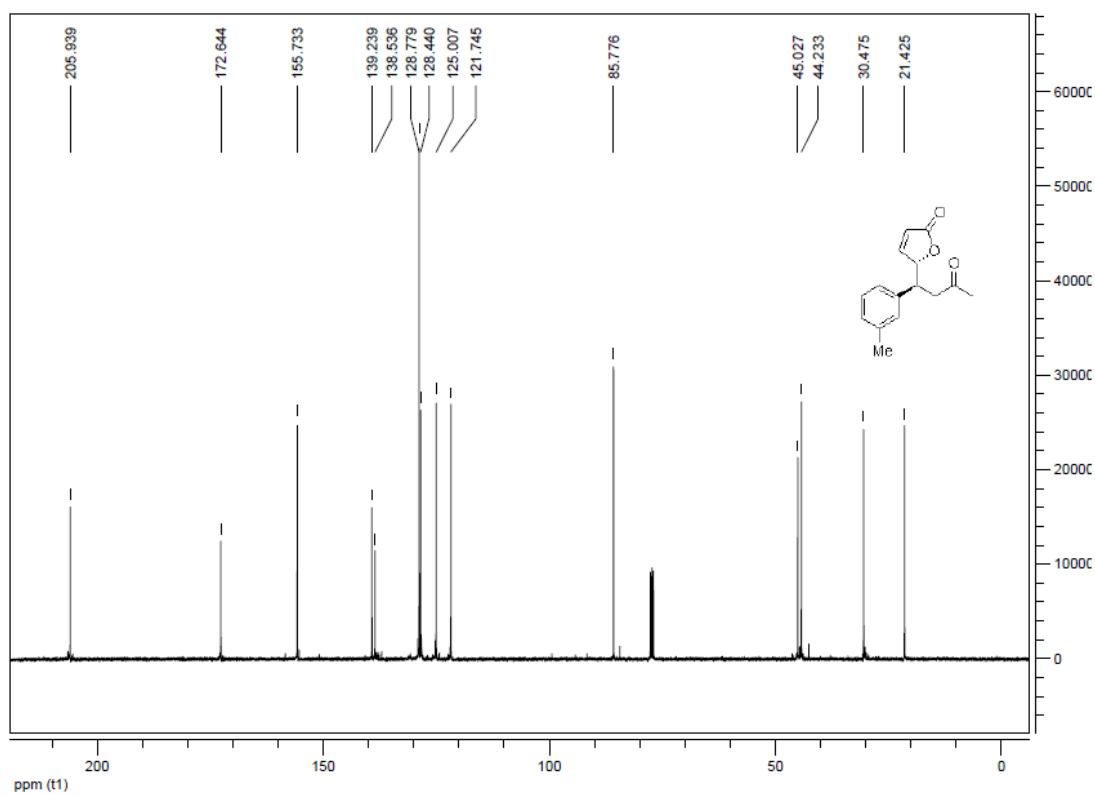

**6m: 5-(3-oxo-1-*p*-tolylbutyl)furan-2(5*H*)-one**

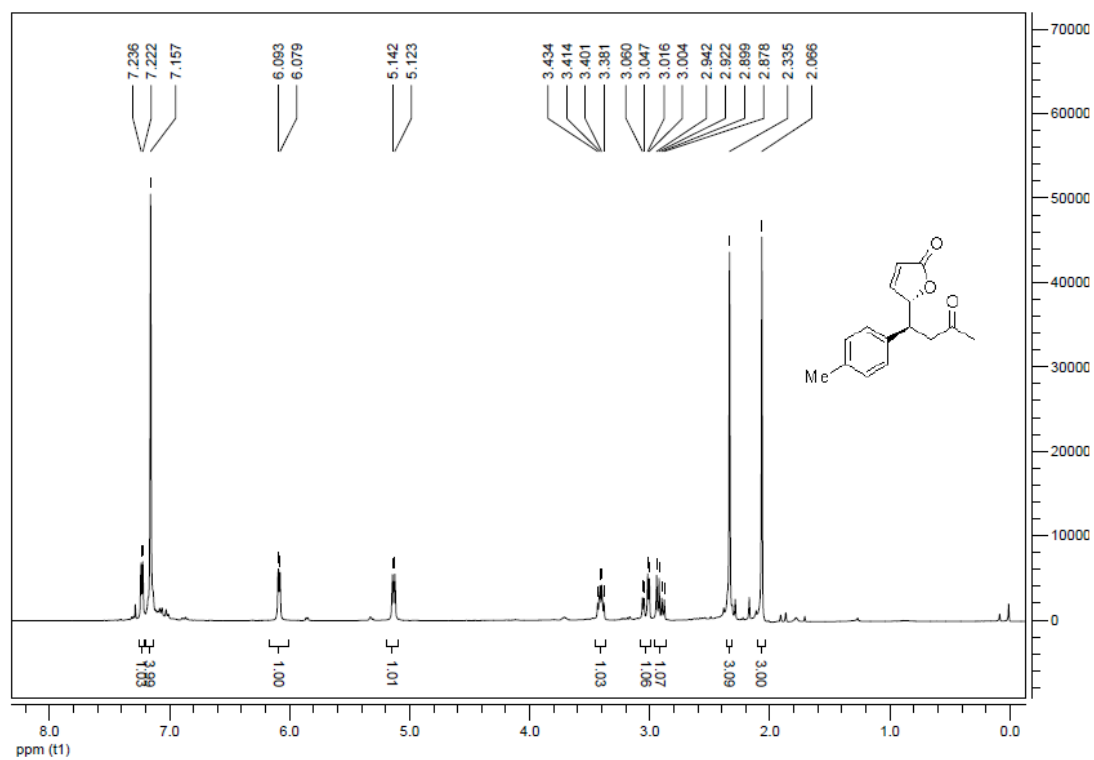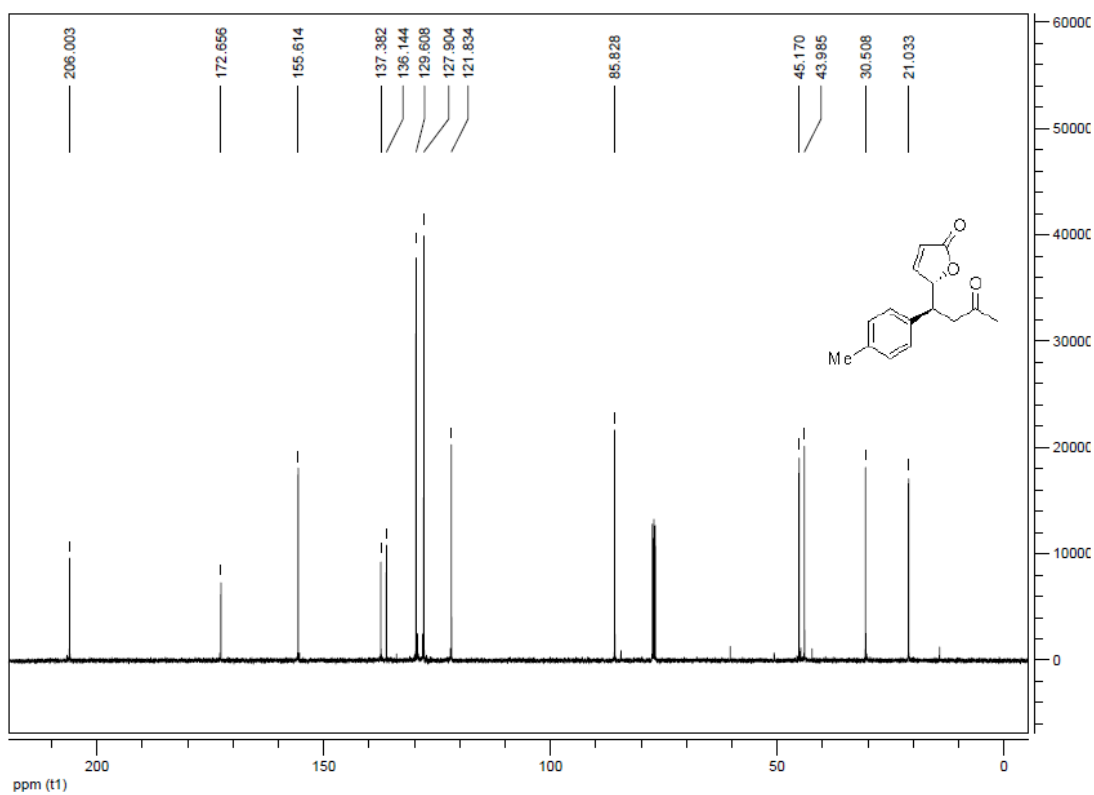

**6n: 5-(1-(2,3-dimethoxyphenyl)-3-oxobutyl)furan-2(5H)-one**

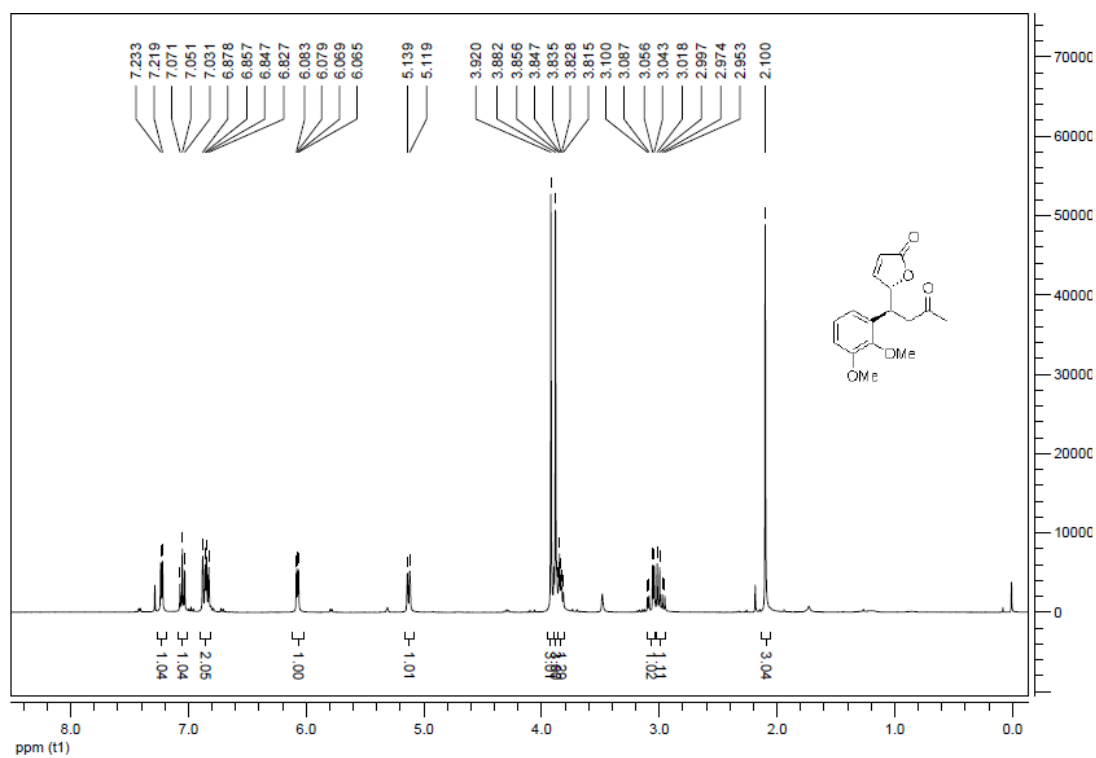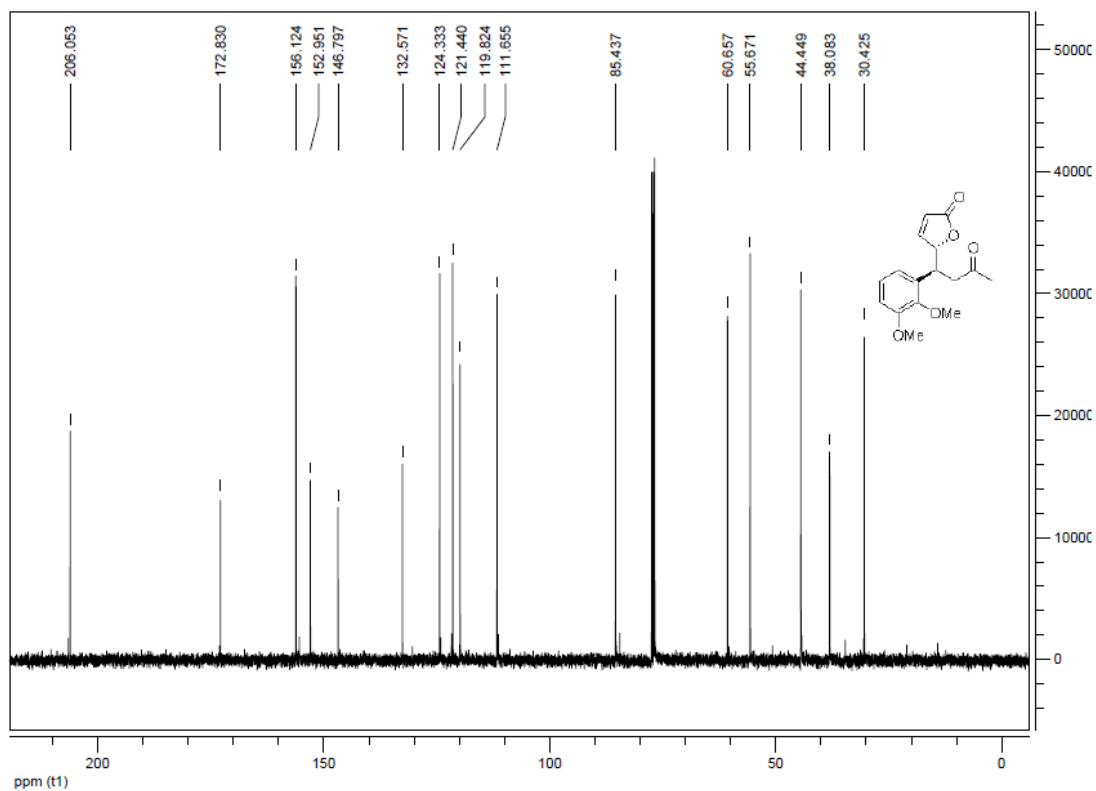

**6o: 5-(1-(2,4-dimethoxyphenyl)-3-oxobutyl)furan-2(5H)-one**

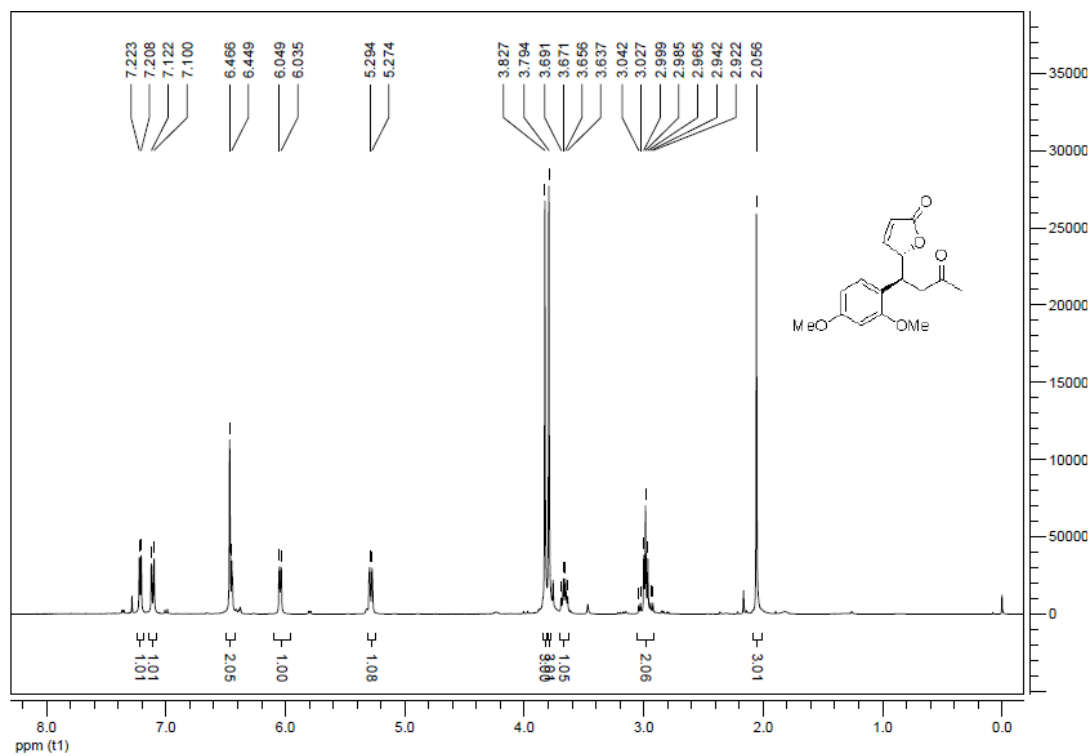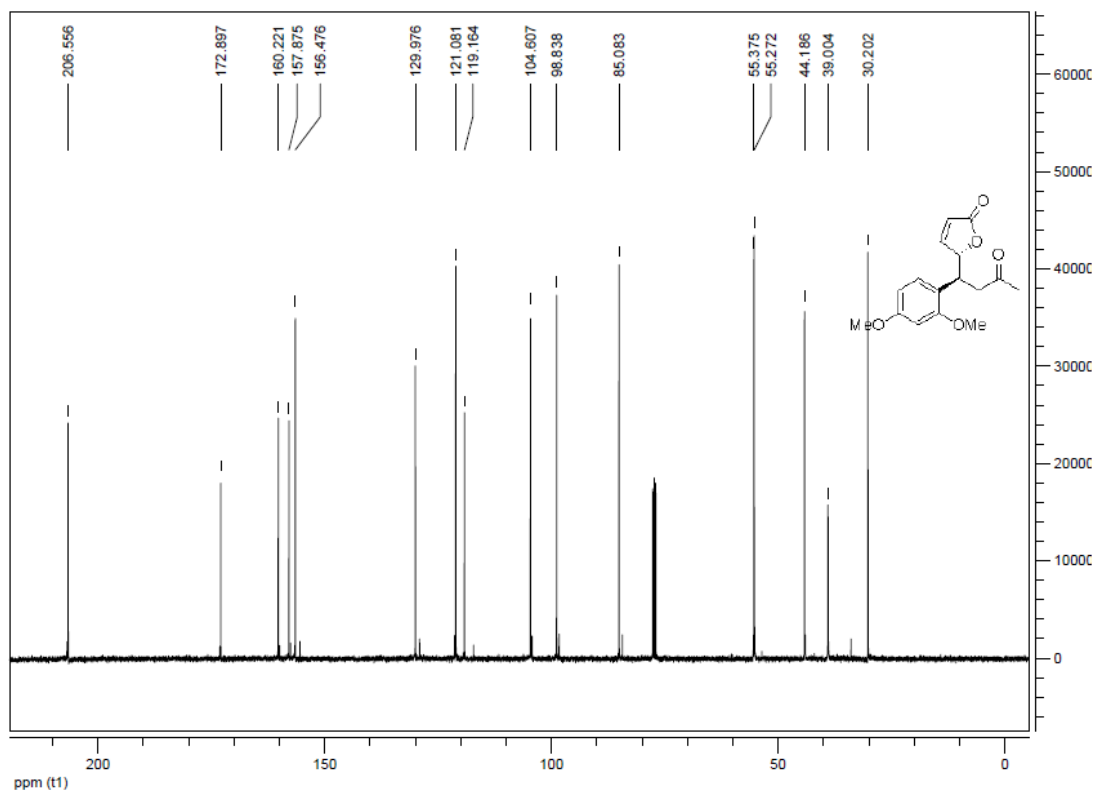

**6p: 5-(1-(naphthalen-2-yl)-3-oxobutyl)furan-2(5H)-one**

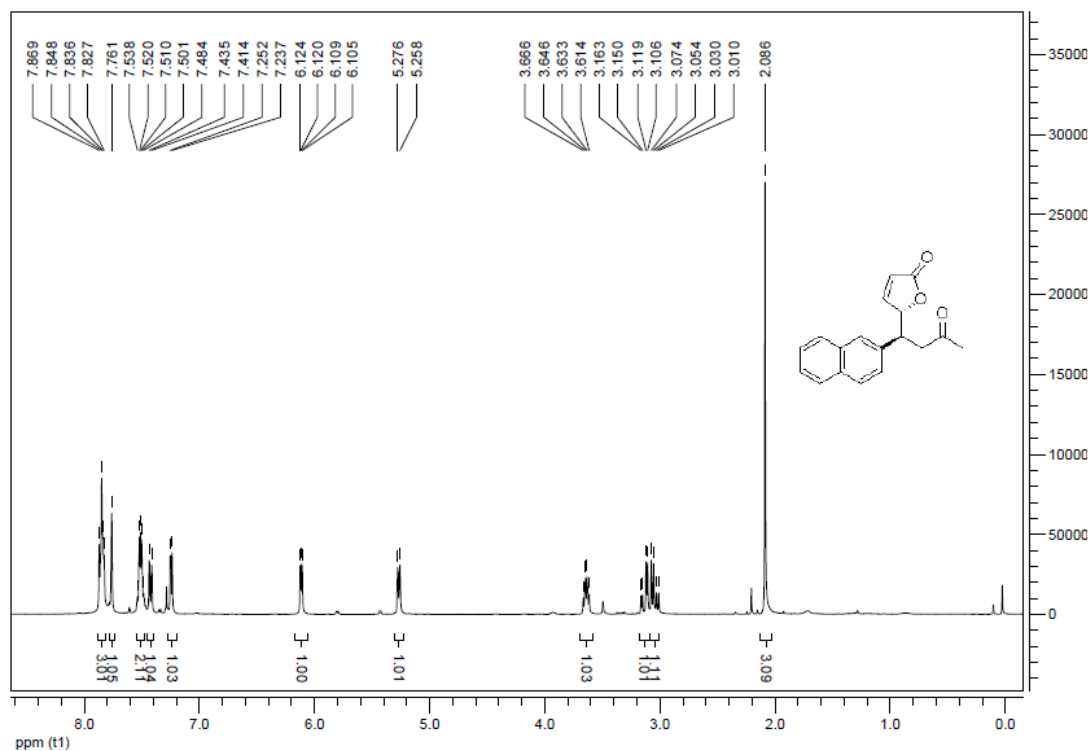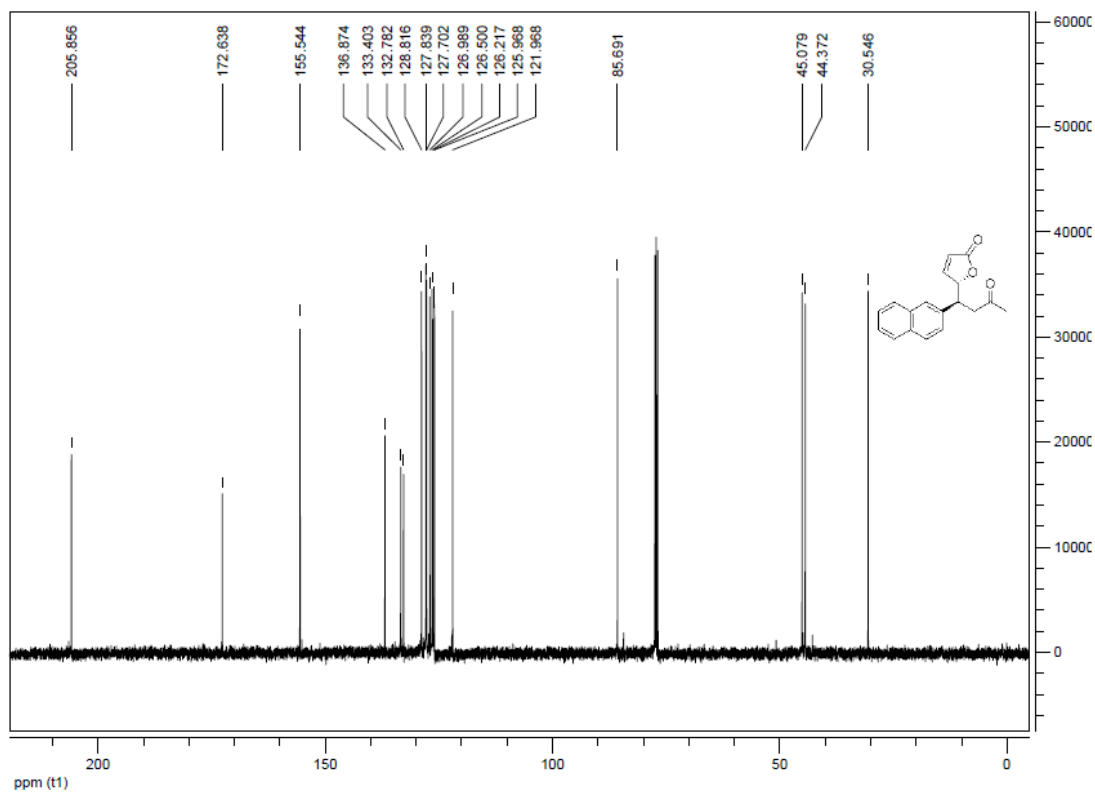

**6q: 5-(1-(furan-2-yl)-3-oxobutyl)furan-2(5H)-one**

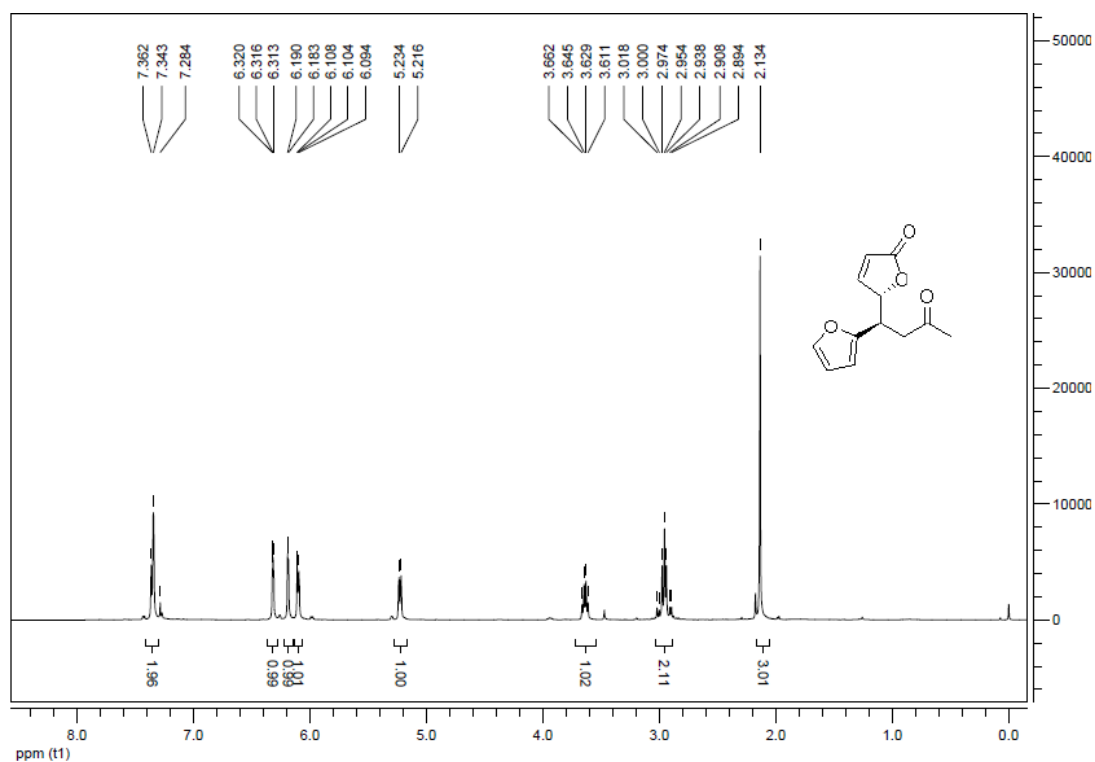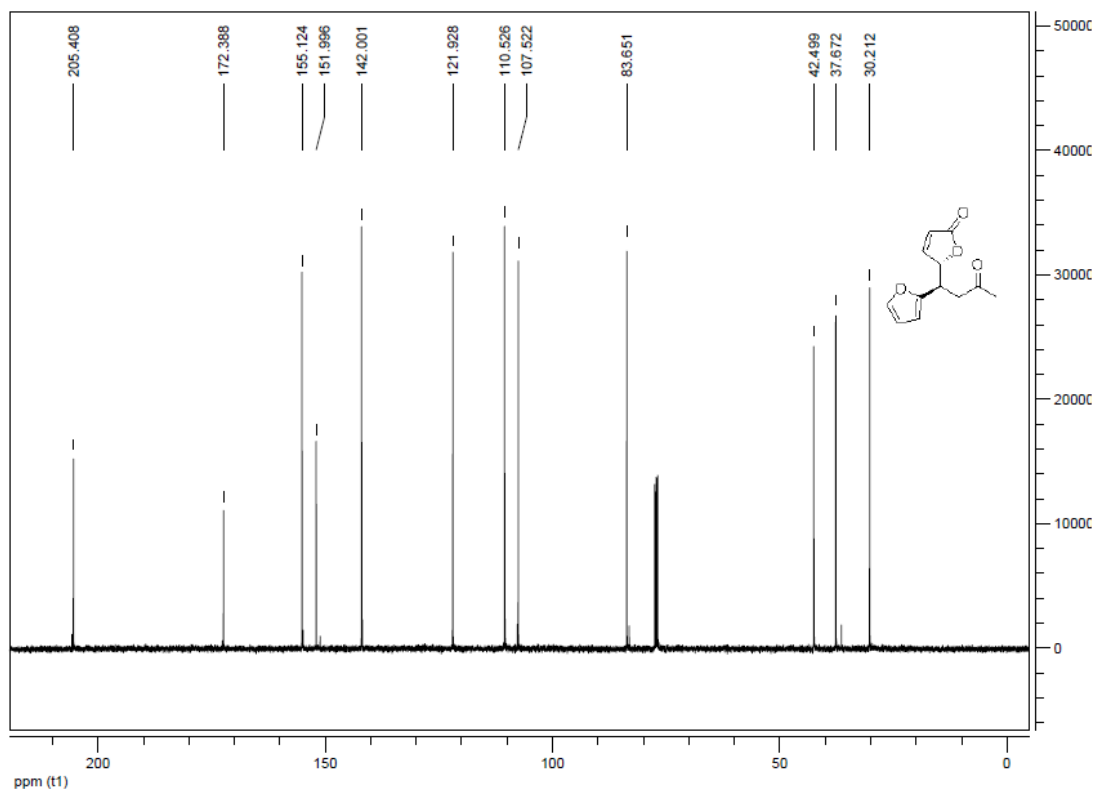



**6r: 5-(3-oxo-1-(thiophen-2-yl)butyl)furan-2(5H)-one**

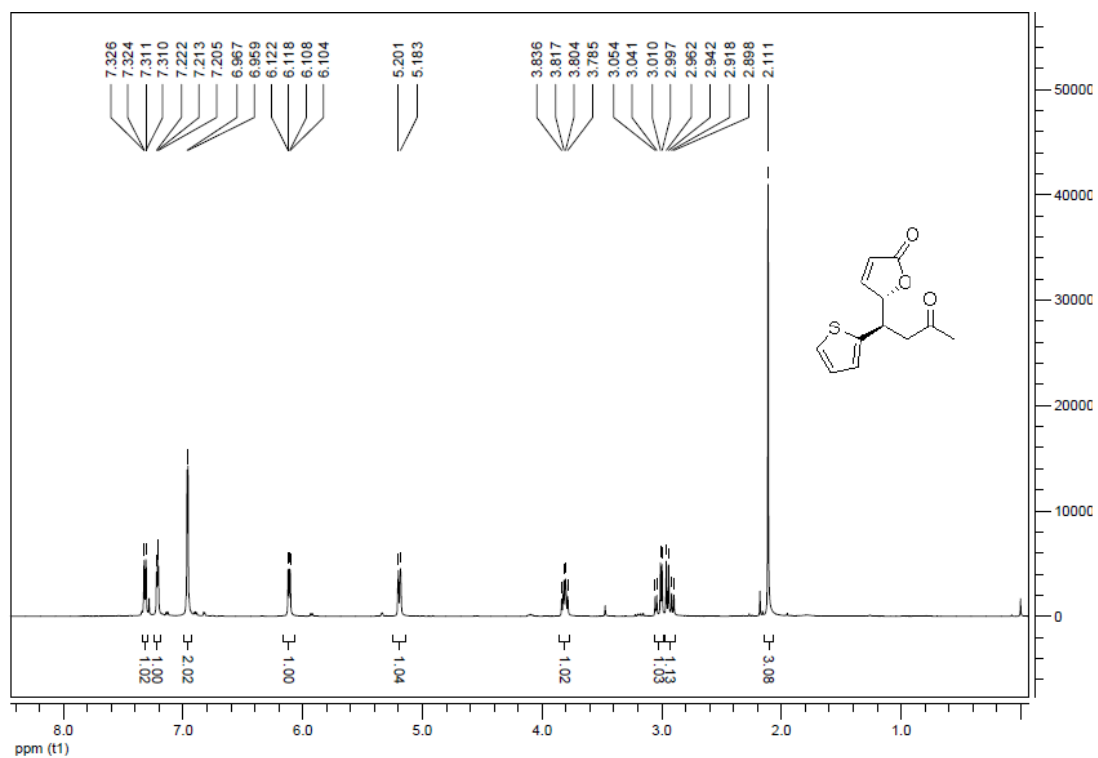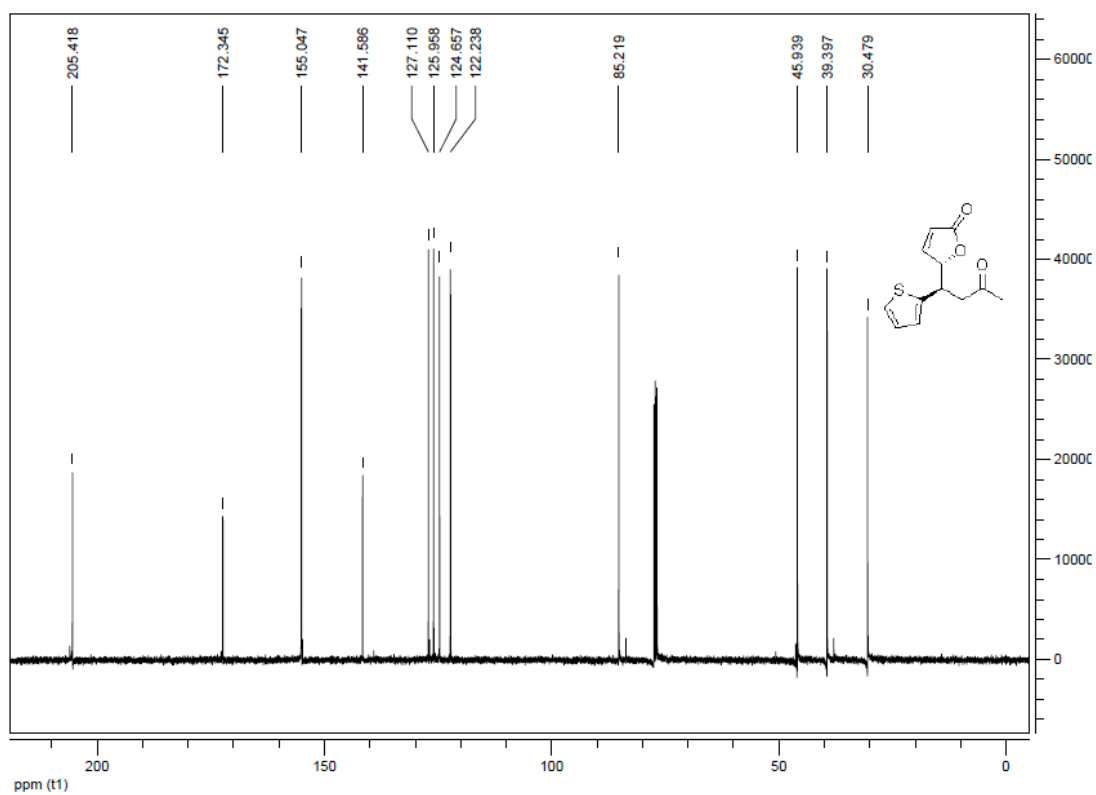

**6s: 5-(3-oxo-1,3-diphenylpropyl)furan-2(5H)-one**

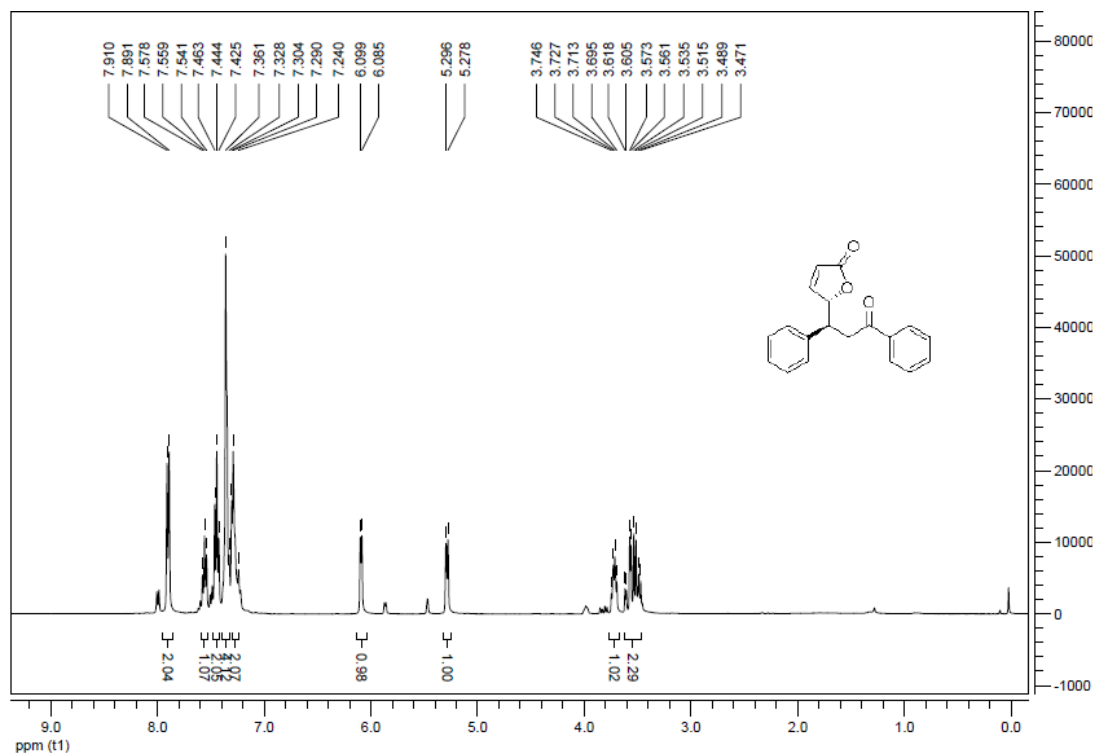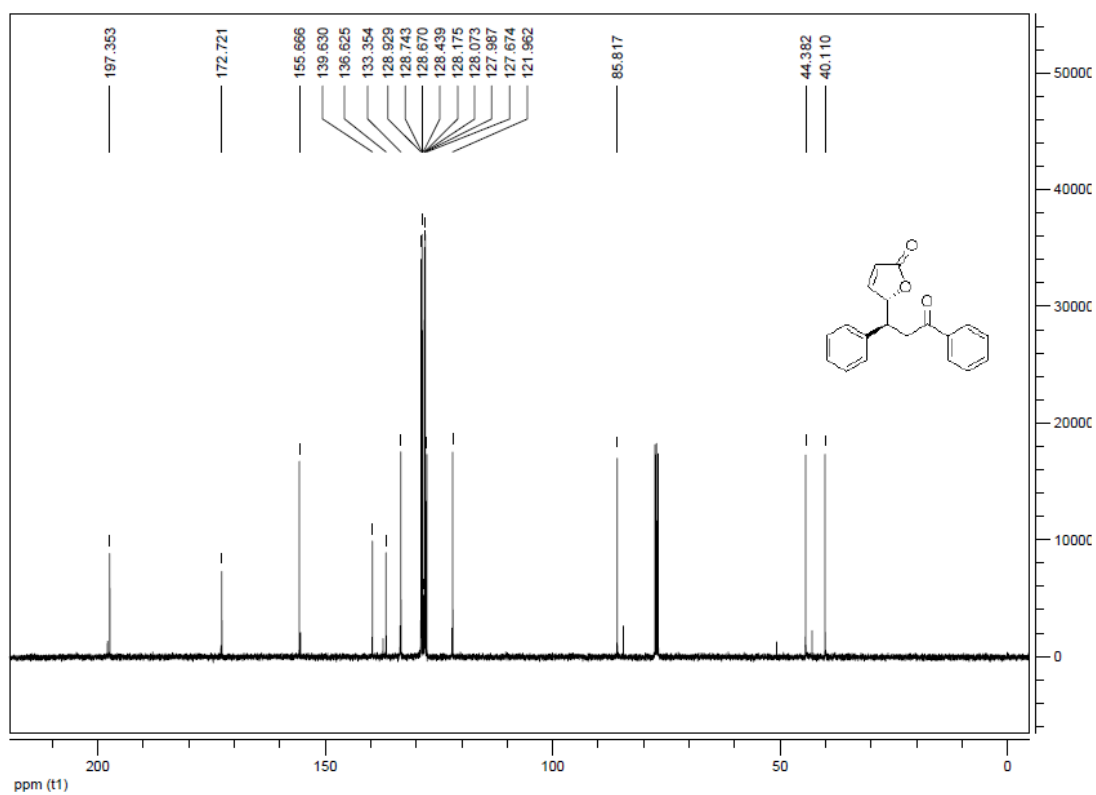

**6t: 5-(2-oxoheptan-4-yl)furan-2(5H)-one**

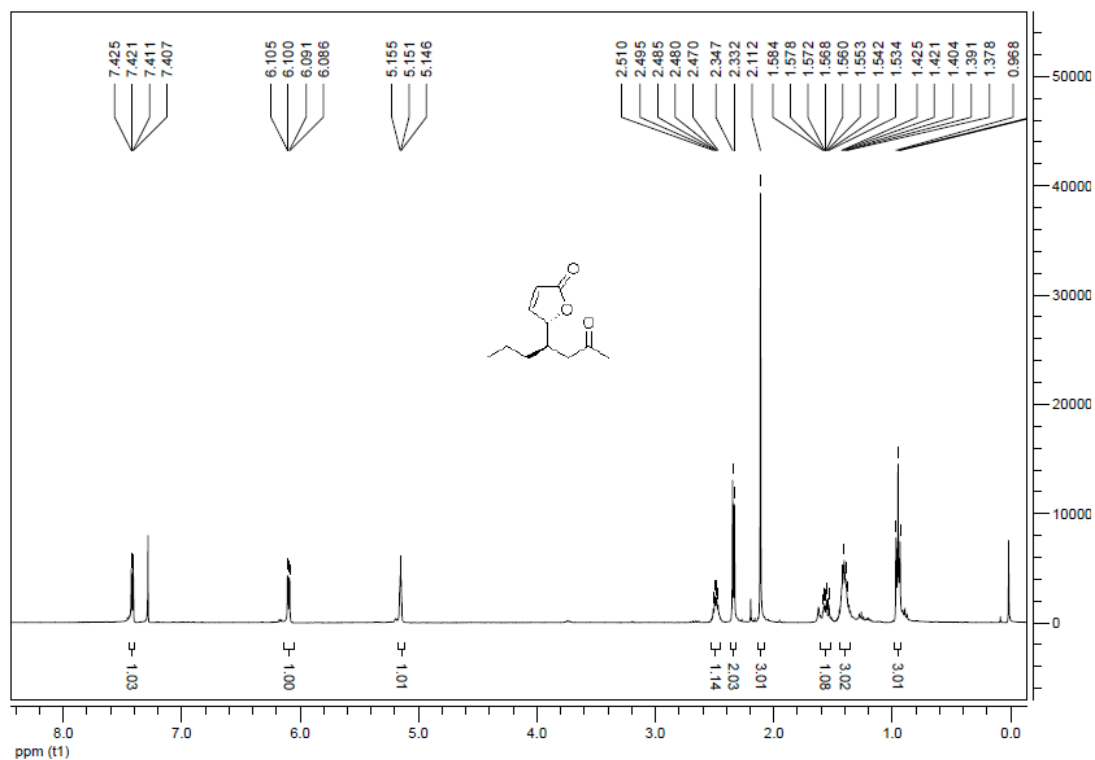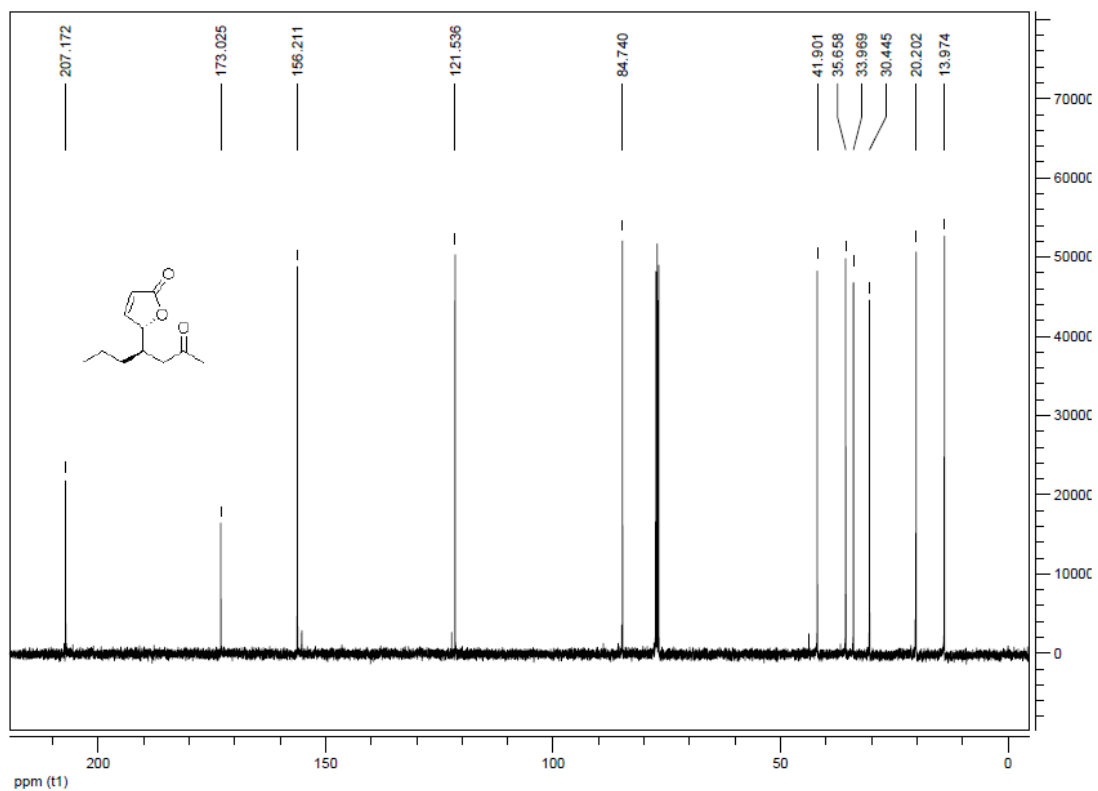

**6u: 5-(2-oxooctan-4-yl)furan-2(5H)-one**

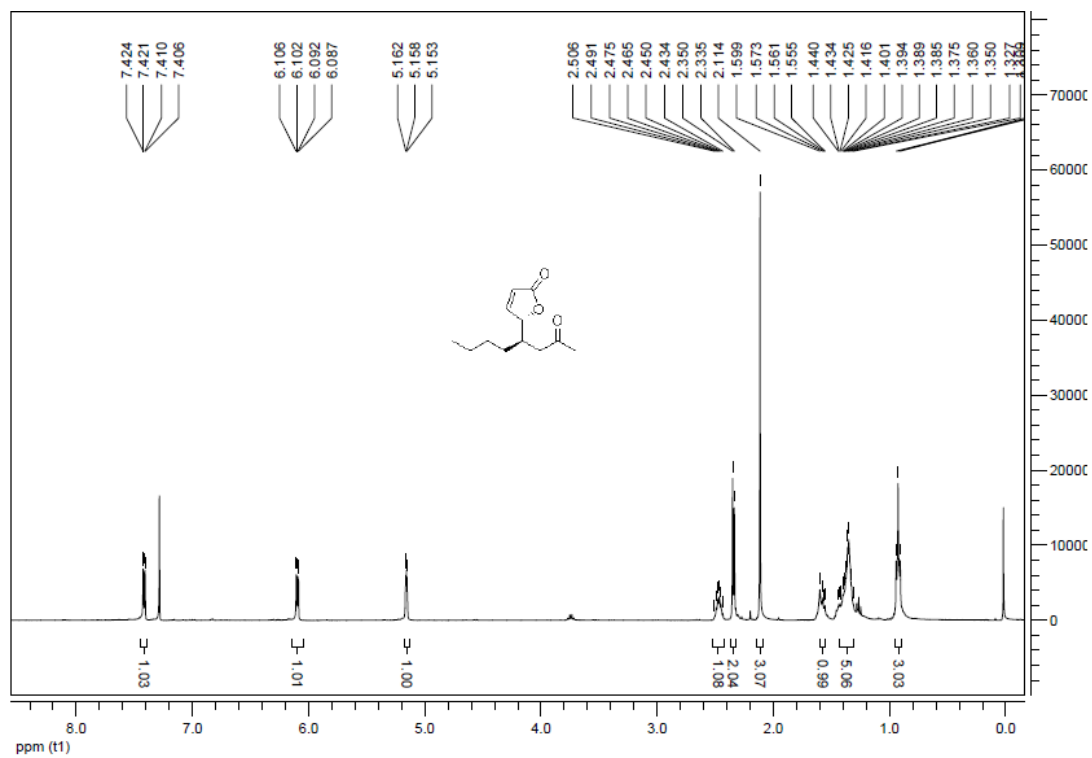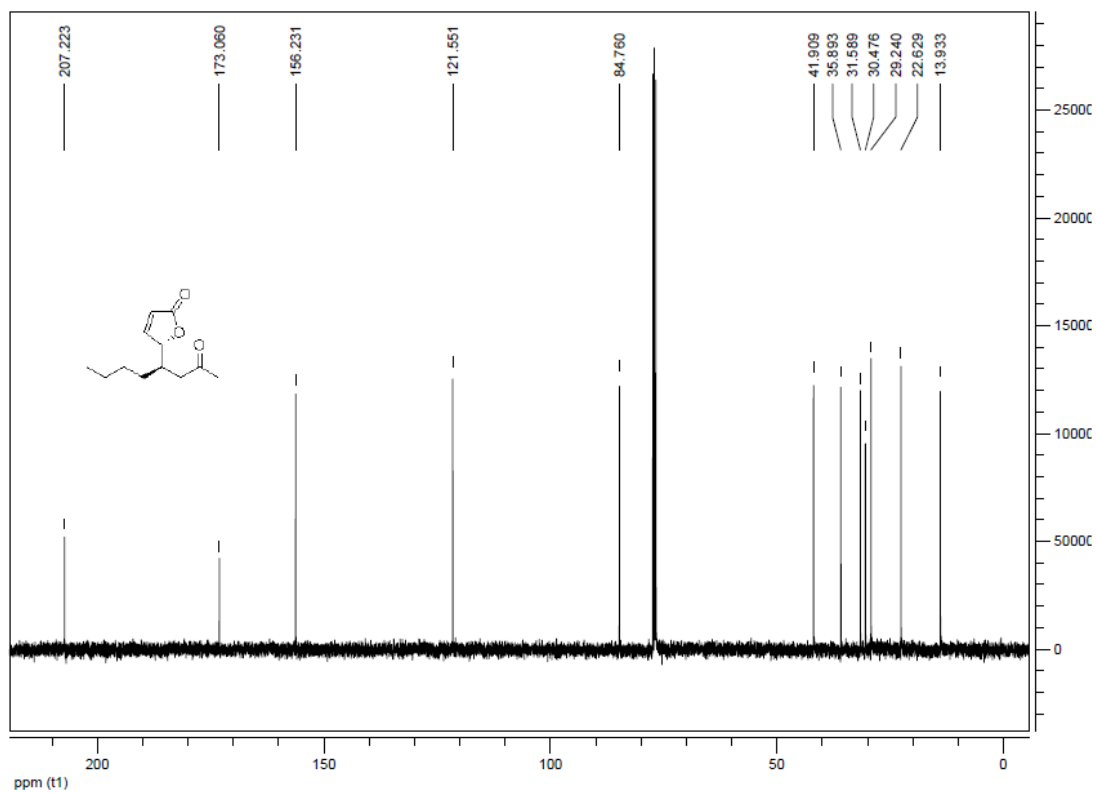

**6v: 5-(2-oxononan-4-yl)furan-2(5H)-one**

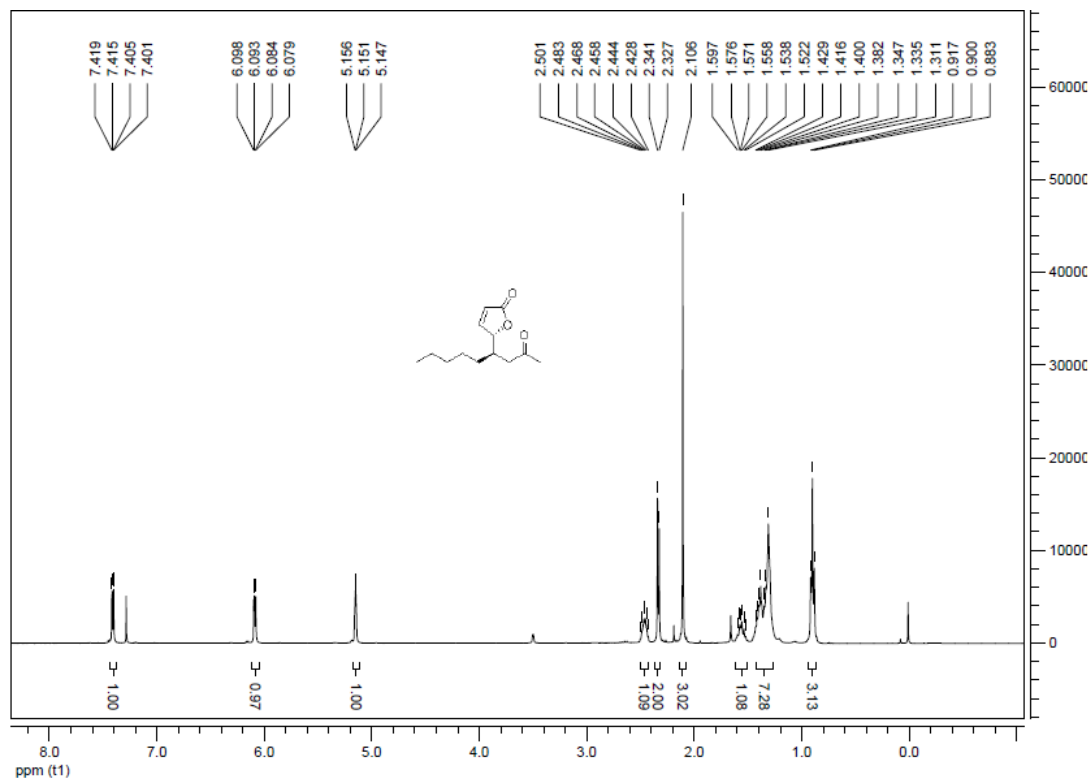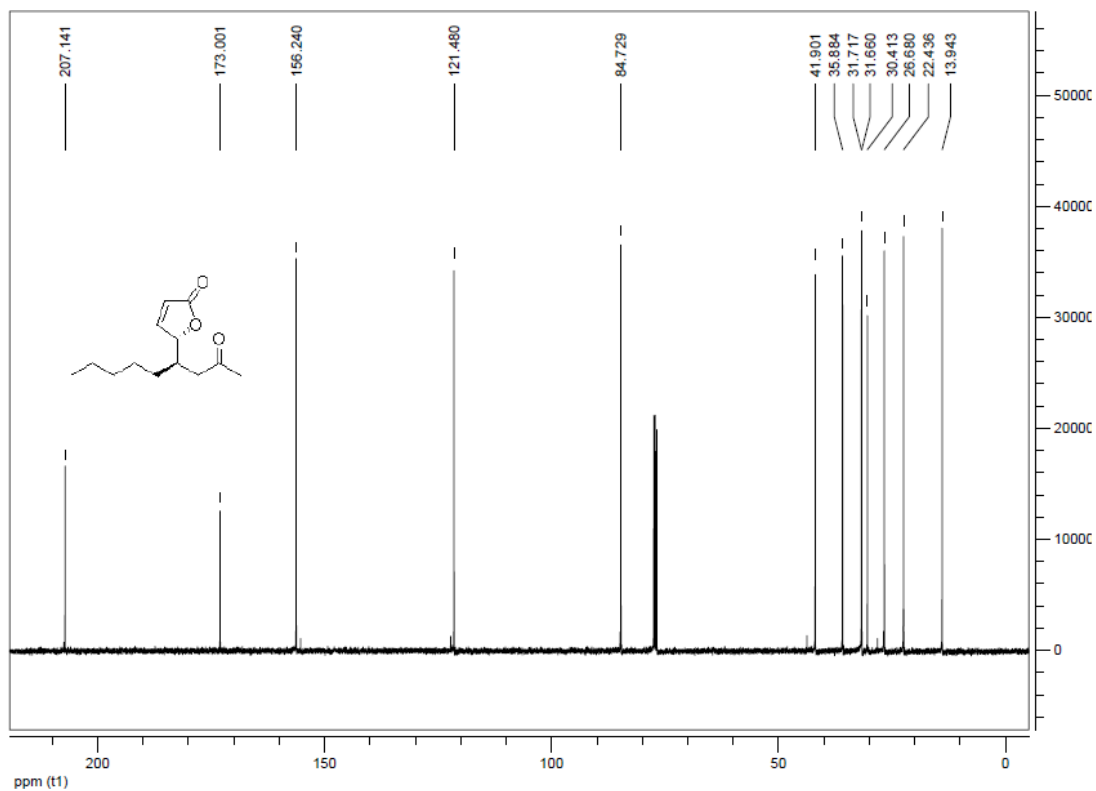

**6w: 5-(2-oxodecan-4-yl)furan-2(5H)-one**

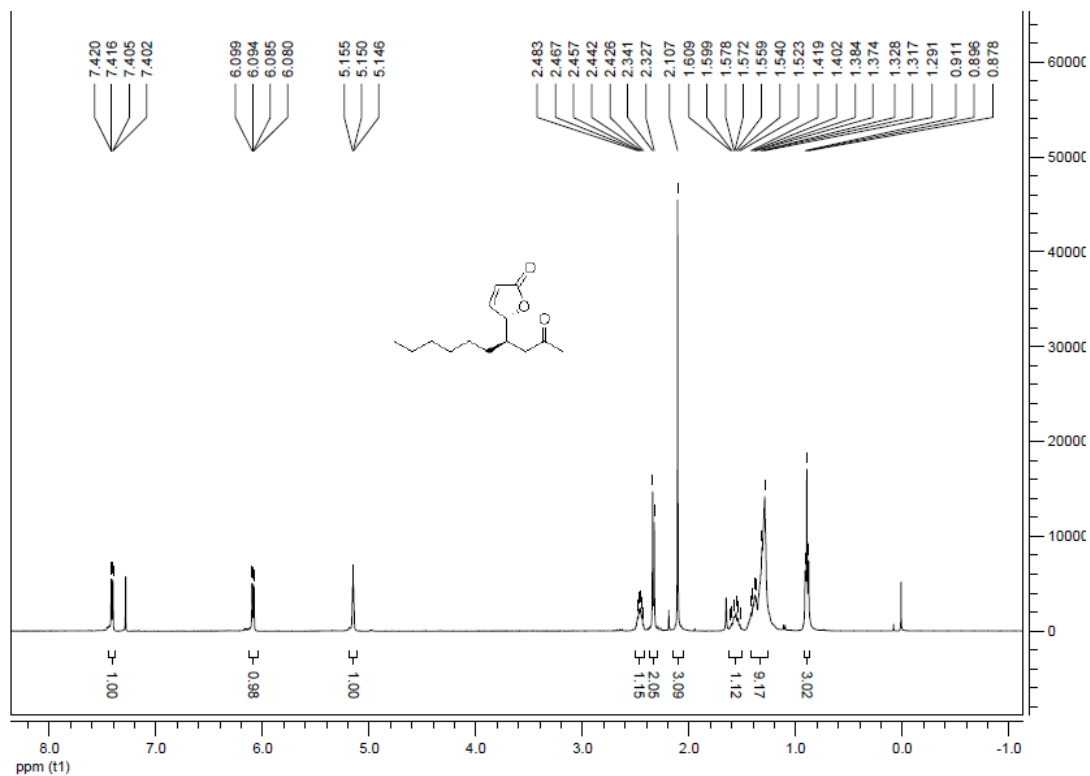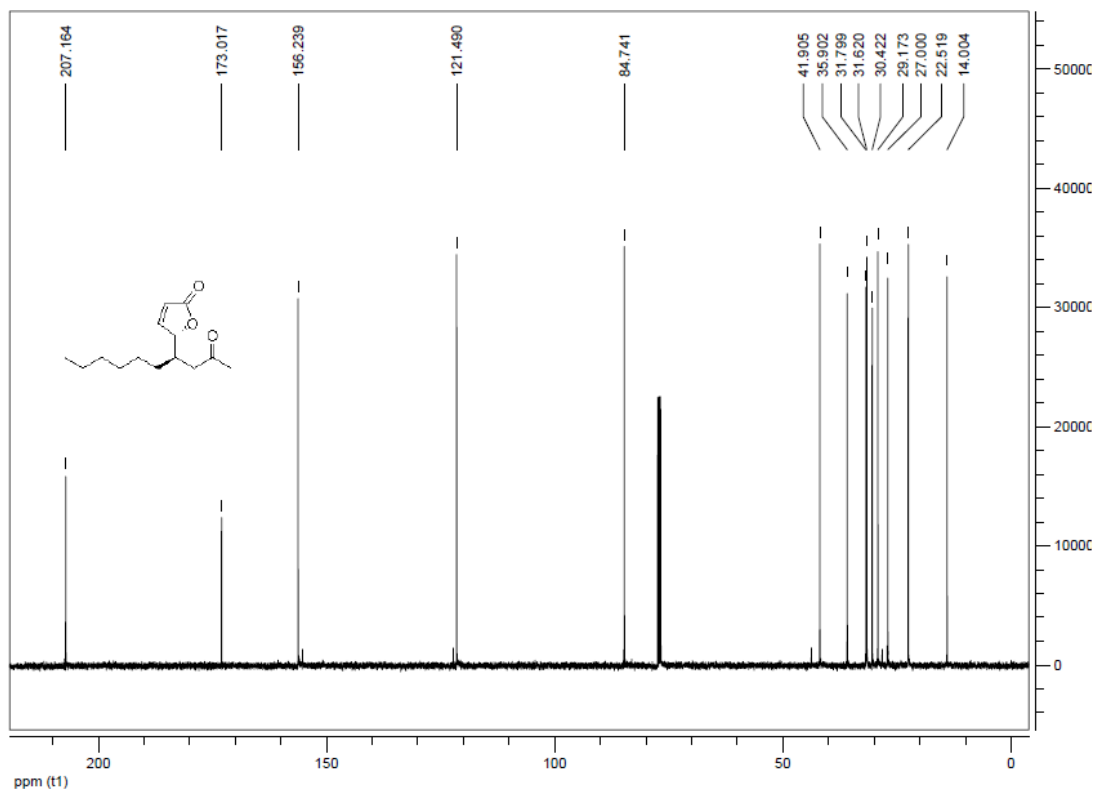

**6x: 5-(4-oxooctan-2-yl)furan-2(5H)-one**

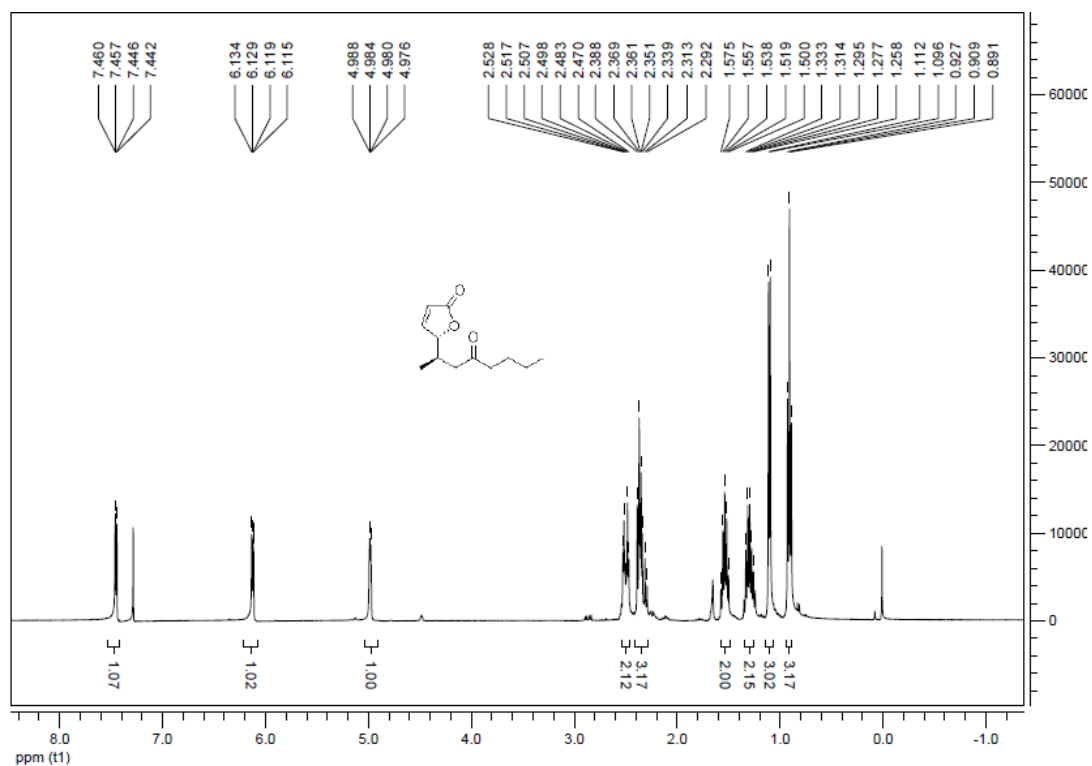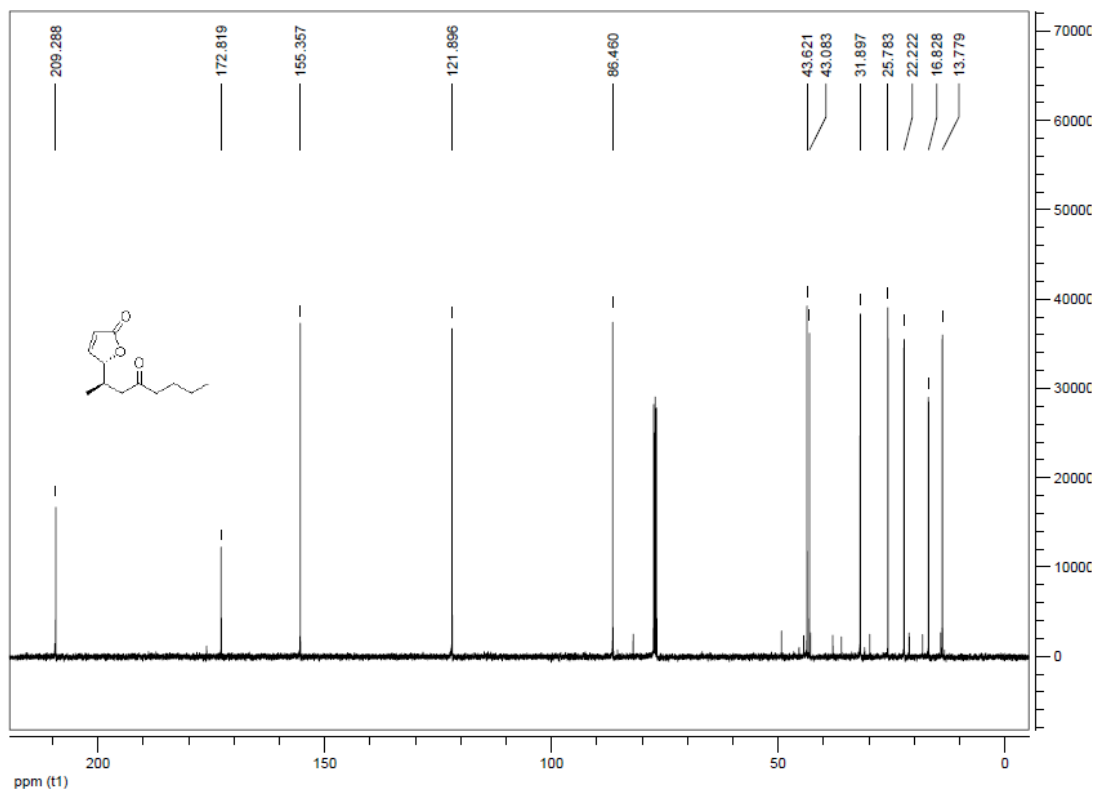

**6y: 5-(5-oxo-1-phenylhexan-3-yl)furan-2(5H)-one**

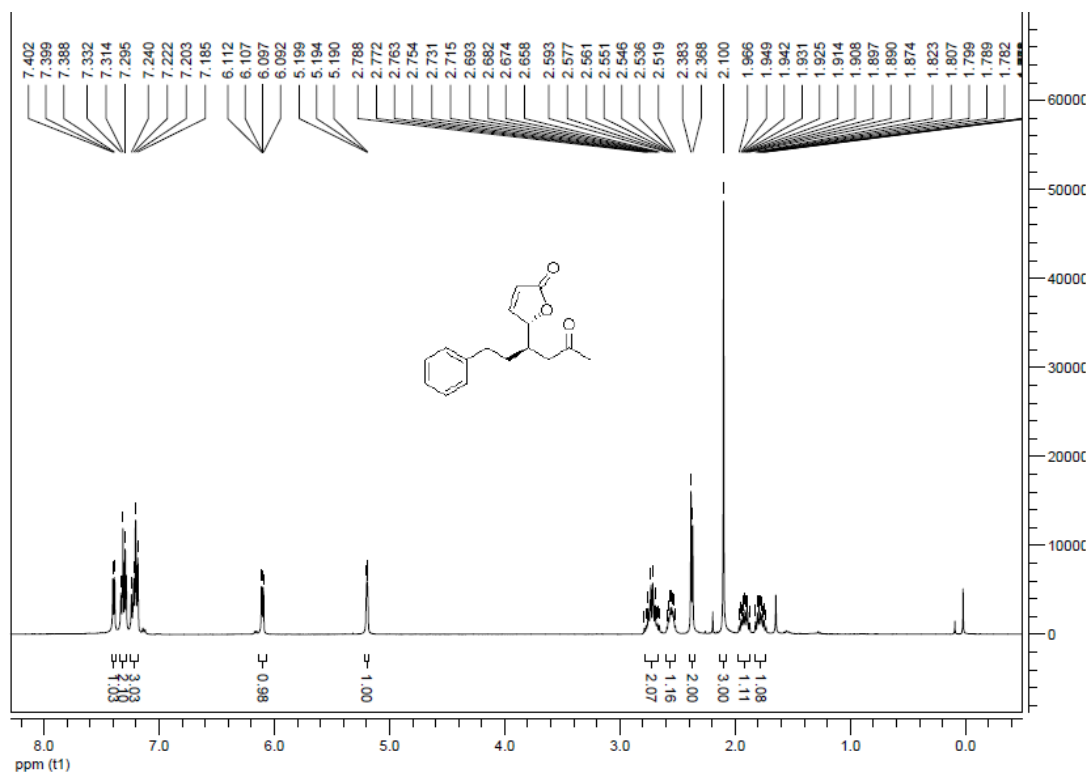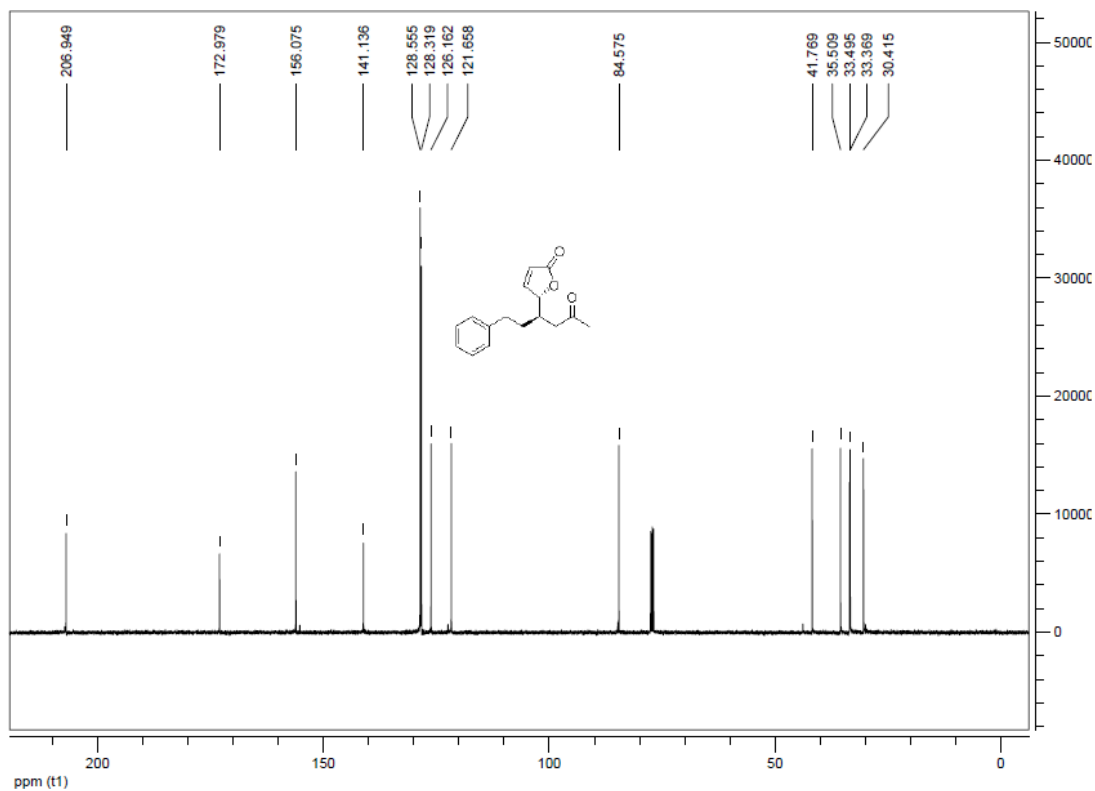



**7a: 5-(3-oxocyclopentyl)furan-2(5H)-one**

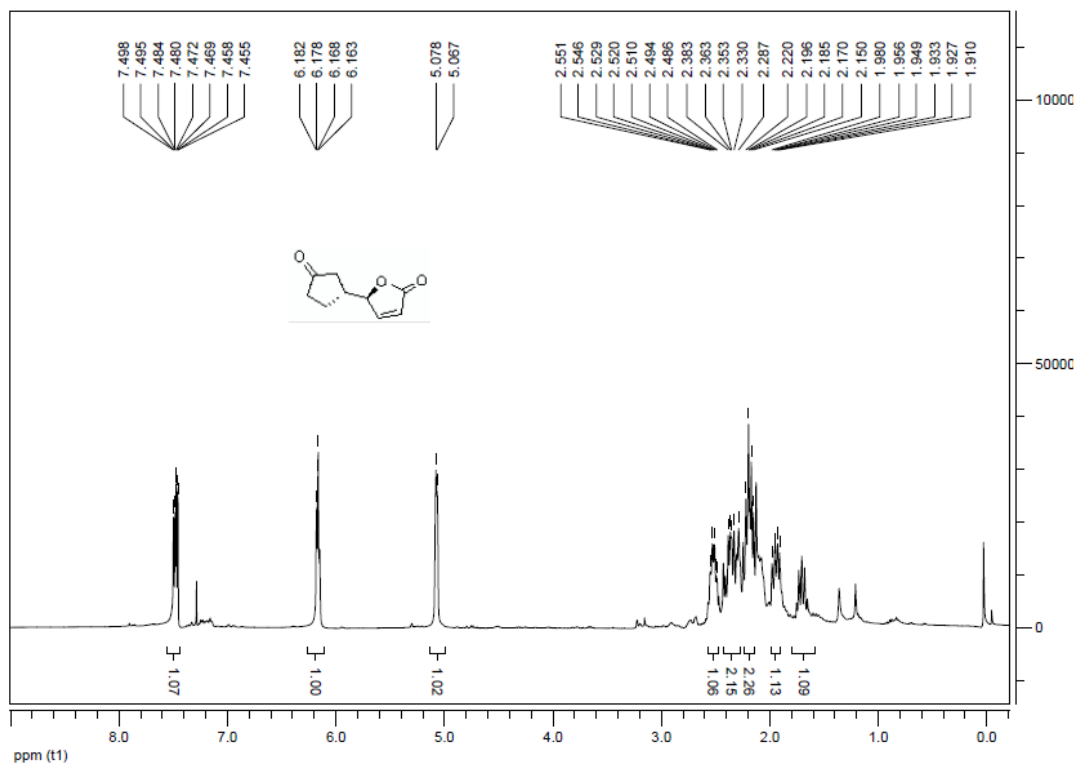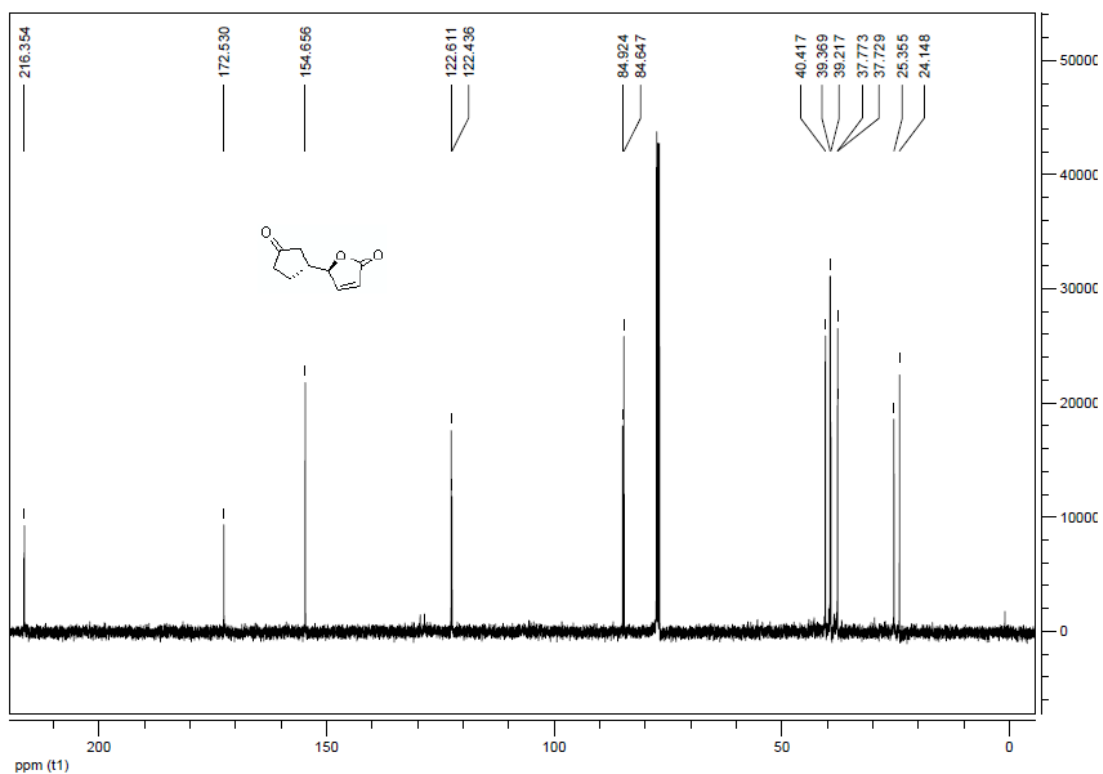

**7b: 5-(3-oxocycloheptyl)furan-2(5H)-one**

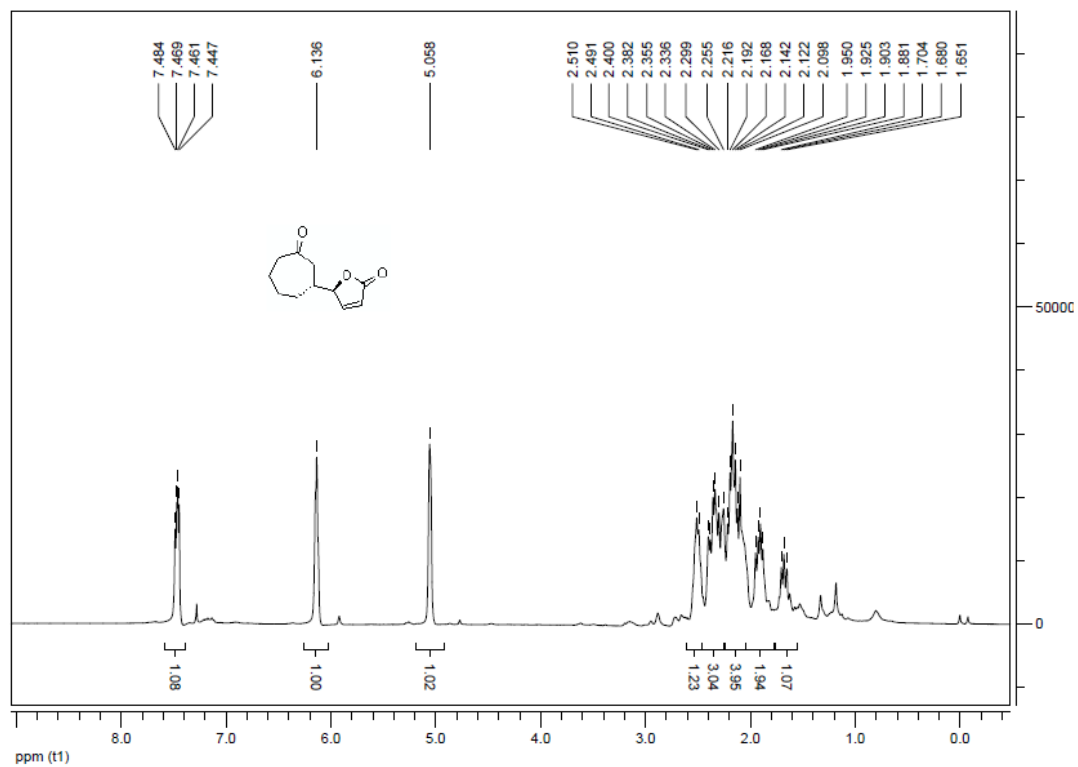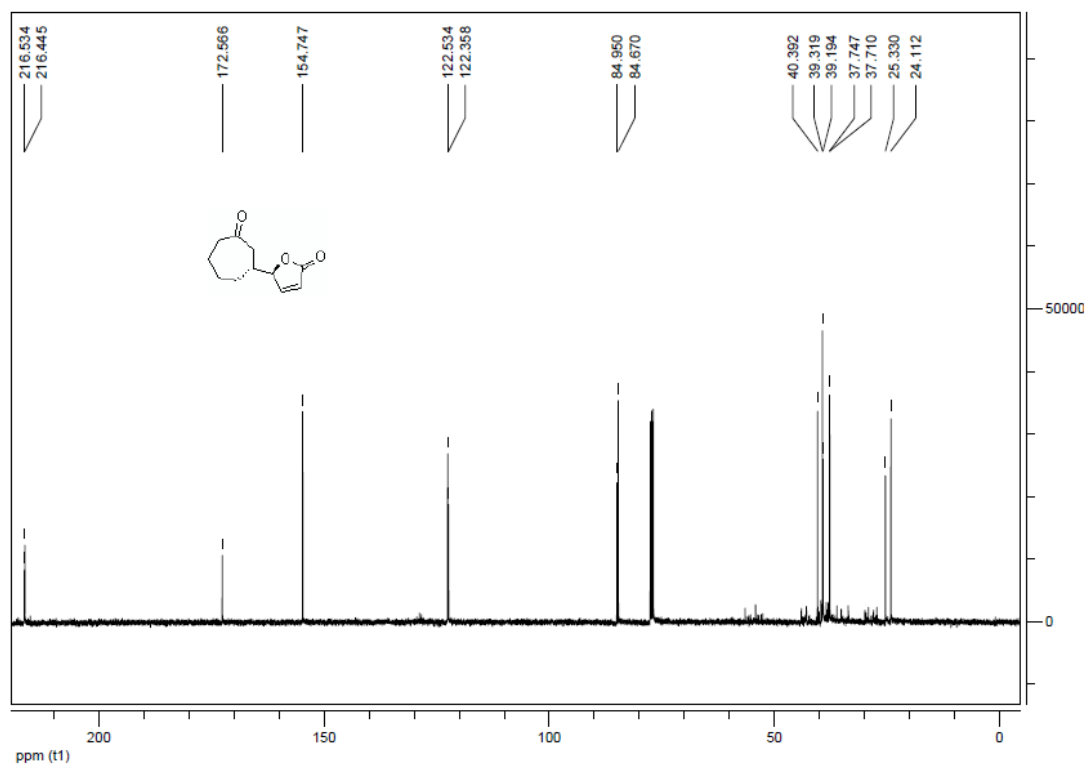

## G: Absolute Configuration and X-Ray Analysis Data

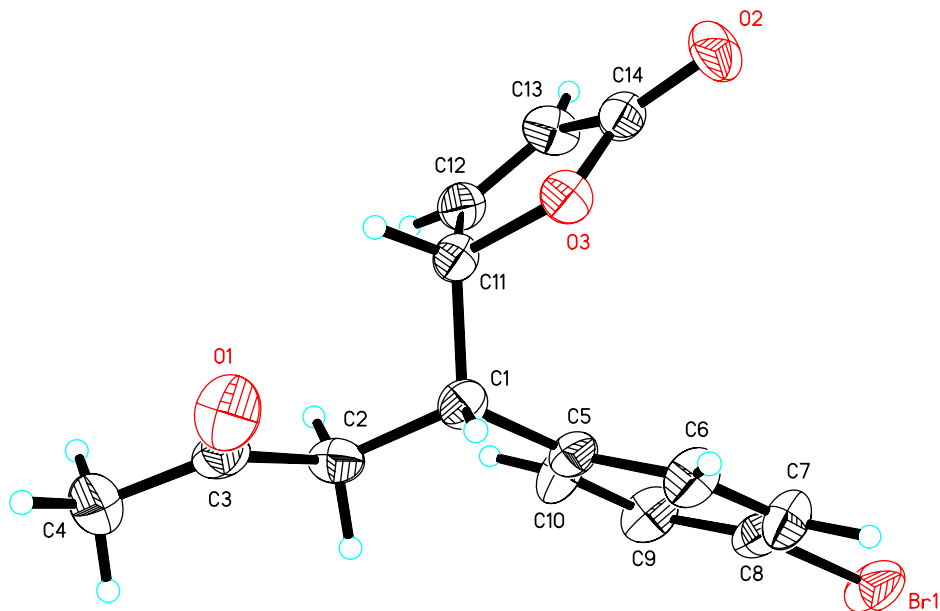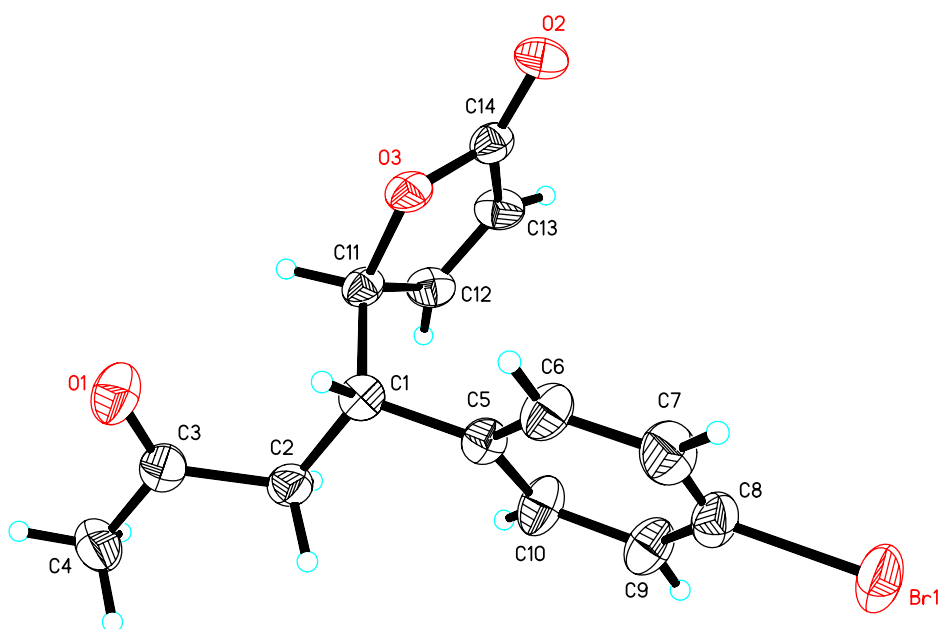

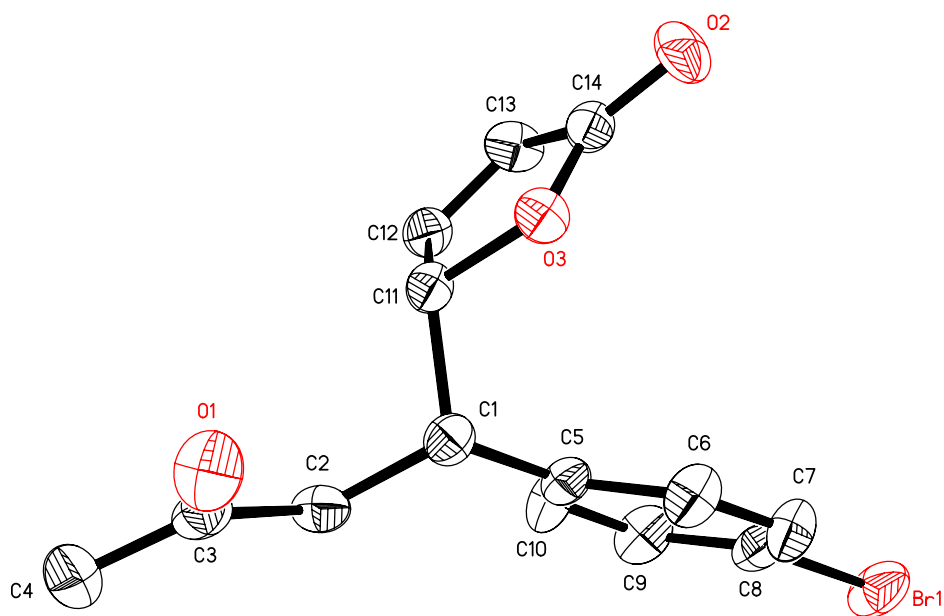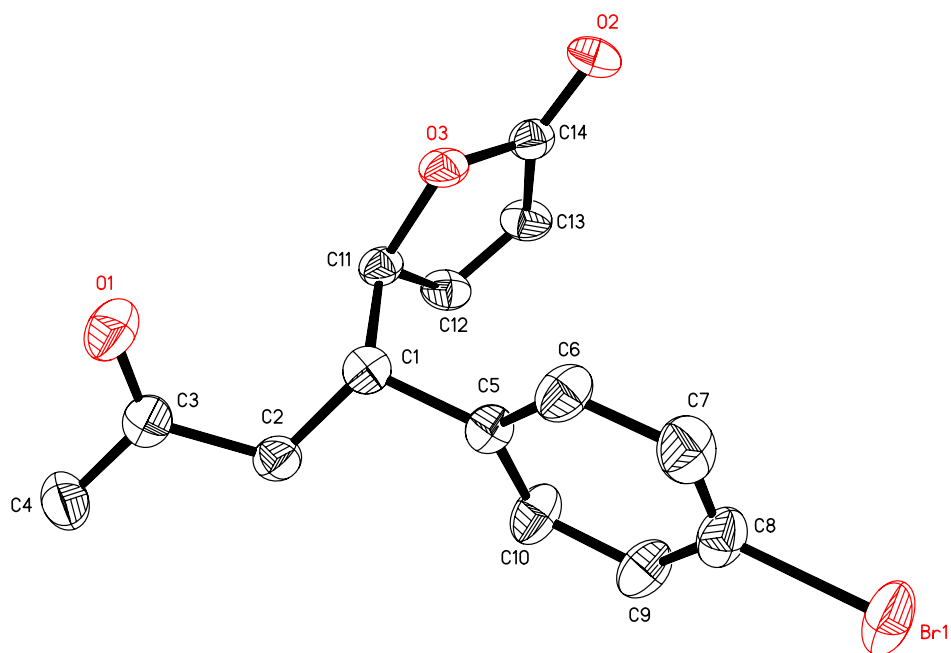

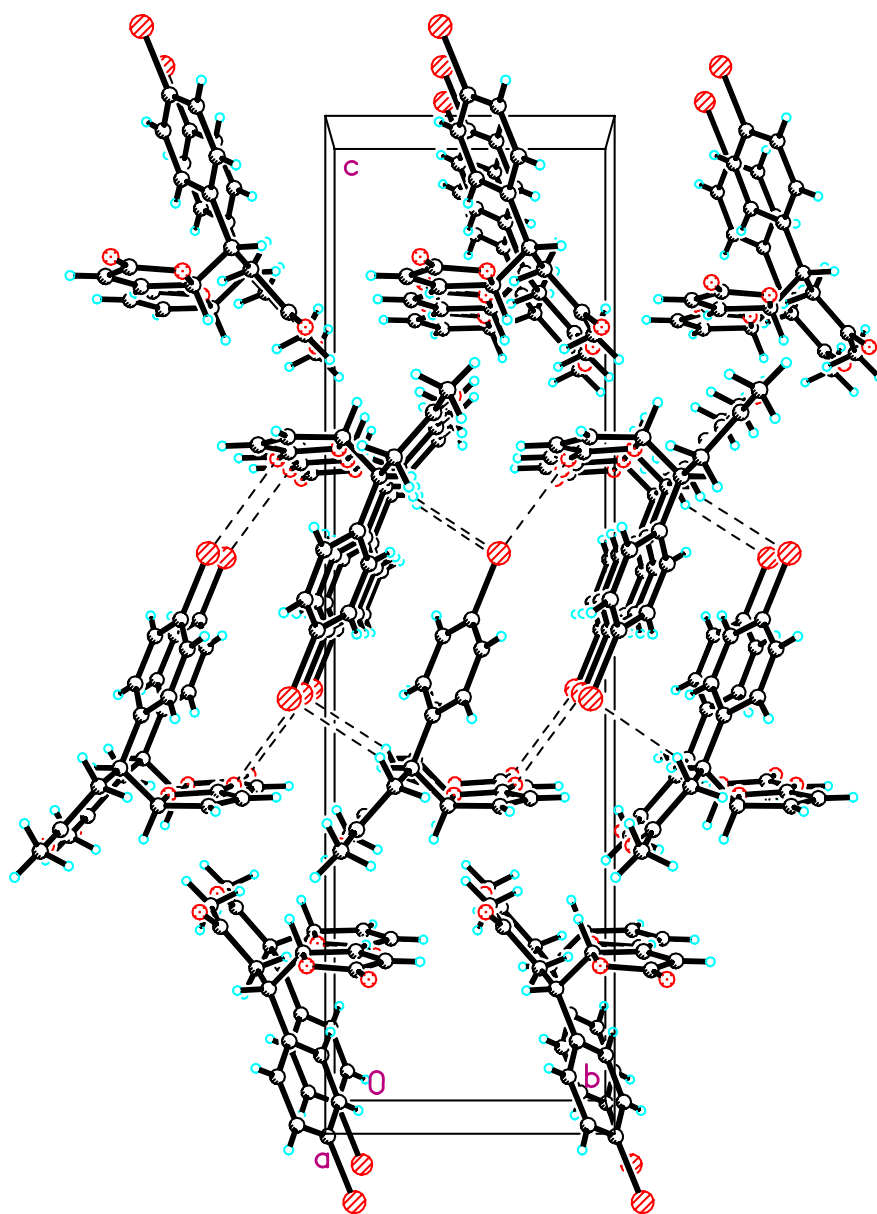

Table 1. Crystal data and structure refinement for cd20181.

|                             |                                                                                                                 |
|-----------------------------|-----------------------------------------------------------------------------------------------------------------|
| Identification code         | cd20181                                                                                                         |
| Empirical formula           | C <sub>14</sub> H <sub>13</sub> Br O <sub>3</sub>                                                               |
| Formula weight              | 309.15                                                                                                          |
| Temperature                 | 293(2) K                                                                                                        |
| Wavelength                  | 0.71073 Å                                                                                                       |
| Crystal system, space group | Orthorhombic, P2(1)2(1)2(1)                                                                                     |
| Unit cell dimensions        | a = 6.5631(11) Å    alpha = 90 deg.<br>b = 7.7659(12) Å    beta = 90 deg.<br>c = 27.286(4) Å    gamma = 90 deg. |
| Volume                      | 1390.7(4) Å <sup>3</sup>                                                                                        |
| Z, Calculated density       | 4, 1.477 Mg/m <sup>3</sup>                                                                                      |

|                                 |                                             |
|---------------------------------|---------------------------------------------|
| Absorption coefficient          | 2.953 mm <sup>-1</sup>                      |
| F(000)                          | 624                                         |
| Crystal size                    | 0.425 x 0.340 x 0.308 mm                    |
| Theta range for data collection | 2.73 to 27.50 deg.                          |
| Limiting indices                | -8<=h<=8, -9<=k<=10, -19<=l<=35             |
| Reflections collected / unique  | 8391 / 3168 [R(int) = 0.0517]               |
| Completeness to theta = 27.50   | 99.5 %                                      |
| Absorption correction           | Empirical                                   |
| Max. and min. transmission      | 1.0000 and 0.4111                           |
| Refinement method               | Full-matrix least-squares on F <sup>2</sup> |
| Data / restraints / parameters  | 3168 / 0 / 165                              |

|                                      |                                       |
|--------------------------------------|---------------------------------------|
| Goodness-of-fit on $F^2$             | 0.847                                 |
| Final R indices [ $I > 2\sigma(I)$ ] | R1 = 0.0414, wR2 = 0.0838             |
| R indices (all data)                 | R1 = 0.0765, wR2 = 0.0910             |
| Absolute structure parameter         | 0.036(12)                             |
| Extinction coefficient               | 0.0309(15)                            |
| Largest diff. peak and hole          | 0.615 and -0.574 e. $\text{\AA}^{-3}$ |



Table 2. Atomic coordinates ( $\times 10^4$ ) and equivalent isotropic displacement parameters ( $\text{Å}^2 \times 10^3$ ) for cd20181.

U(eq) is defined as one third of the trace of the orthogonalized

U<sub>ij</sub> tensor.

---

|       | x        | y        | z       | U(eq) |
|-------|----------|----------|---------|-------|
| Br(1) | 9345(1)  | 10993(1) | -699(1) | 83(1) |
| O(1)  | 8262(5)  | 5554(4)  | 2143(1) | 73(1) |
| O(2)  | 14229(4) | 11606(3) | 1619(1) | 62(1) |
| O(3)  | 12042(3) | 9439(3)  | 1696(1) | 45(1) |
| C(1)  | 8985(5)  | 7999(5)  | 1398(1) | 45(1) |
| C(2)  | 6833(6)  | 7466(5)  | 1552(1) | 50(1) |
| C(3)  | 6748(7)  | 6181(5)  | 1966(1) | 52(1) |
| C(4)  | 4654(6)  | 5714(6)  | 2141(2) | 75(1) |
| C(5)  | 9068(6)  | 8721(4)  | 882(1)  | 45(1) |
| C(6)  | 10710(6) | 8385(5)  | 582(1)  | 58(1) |
| C(7)  | 10802(7) | 9061(6)  | 111(2)  | 70(1) |

---

|       |          |          |         |       |
|-------|----------|----------|---------|-------|
| C(8)  | 9260(8)  | 10062(5) | -51(1)  | 61(1) |
| C(9)  | 7600(7)  | 10403(5) | 234(2)  | 64(1) |
| C(10) | 7536(6)  | 9778(5)  | 699(2)  | 61(1) |
| C(11) | 9883(4)  | 9238(5)  | 1774(1) | 41(1) |
| C(12) | 9101(5)  | 11036(5) | 1771(1) | 49(1) |
| C(13) | 10608(6) | 12092(5) | 1713(1) | 52(1) |
| C(14) | 12505(6) | 11150(5) | 1669(1) | 45(1) |

---

Table 3. Bond lengths [Å] and angles [deg] for cd20181.

---

|            |          |
|------------|----------|
| Br(1)-C(8) | 1.911(4) |
| O(1)-C(3)  | 1.207(5) |
| O(2)-C(14) | 1.194(4) |
| O(3)-C(14) | 1.365(4) |
| O(3)-C(11) | 1.441(4) |
| C(1)-C(5)  | 1.516(5) |
| C(1)-C(11) | 1.526(5) |
| C(1)-C(2)  | 1.531(5) |
| C(1)-H(1)  | 0.9800   |
| C(2)-C(3)  | 1.509(5) |
| C(2)-H(2A) | 0.9700   |
| C(2)-H(2B) | 0.9700   |
| C(3)-C(4)  | 1.498(5) |
| C(4)-H(4A) | 0.9600   |
| C(4)-H(4B) | 0.9600   |
| C(4)-H(4C) | 0.9600   |
| C(5)-C(6)  | 1.379(5) |
| C(5)-C(10) | 1.391(5) |

|                  |          |
|------------------|----------|
| C(6)-C(7)        | 1.390(5) |
| C(6)-H(6)        | 0.9300   |
| C(7)-C(8)        | 1.350(6) |
| C(7)-H(7)        | 0.9300   |
| C(8)-C(9)        | 1.364(6) |
| C(9)-C(10)       | 1.359(5) |
| C(9)-H(9)        | 0.9300   |
| C(10)-H(10)      | 0.9300   |
| C(11)-C(12)      | 1.487(5) |
| C(11)-H(11)      | 0.9800   |
| C(12)-C(13)      | 1.295(5) |
| C(12)-H(12)      | 0.9300   |
| C(13)-C(14)      | 1.448(5) |
| C(13)-H(13)      | 0.9300   |
| C(14)-O(3)-C(11) | 109.4(3) |
| C(5)-C(1)-C(11)  | 112.2(3) |
| C(5)-C(1)-C(2)   | 112.8(3) |
| C(11)-C(1)-C(2)  | 110.0(3) |
| C(5)-C(1)-H(1)   | 107.2    |
| C(11)-C(1)-H(1)  | 107.2    |
| C(2)-C(1)-H(1)   | 107.2    |

|                  |          |
|------------------|----------|
| C(3)-C(2)-C(1)   | 114.7(3) |
| C(3)-C(2)-H(2A)  | 108.6    |
| C(1)-C(2)-H(2A)  | 108.6    |
| C(3)-C(2)-H(2B)  | 108.6    |
| C(1)-C(2)-H(2B)  | 108.6    |
| H(2A)-C(2)-H(2B) | 107.6    |
| O(1)-C(3)-C(4)   | 122.1(4) |
| O(1)-C(3)-C(2)   | 122.3(4) |
| C(4)-C(3)-C(2)   | 115.6(4) |
| C(3)-C(4)-H(4A)  | 109.5    |
| C(3)-C(4)-H(4B)  | 109.5    |
| H(4A)-C(4)-H(4B) | 109.5    |
| C(3)-C(4)-H(4C)  | 109.5    |
| H(4A)-C(4)-H(4C) | 109.5    |
| H(4B)-C(4)-H(4C) | 109.5    |
| C(6)-C(5)-C(10)  | 117.6(3) |
| C(6)-C(5)-C(1)   | 120.6(3) |
| C(10)-C(5)-C(1)  | 121.7(3) |
| C(5)-C(6)-C(7)   | 120.8(4) |
| C(5)-C(6)-H(6)   | 119.6    |
| C(7)-C(6)-H(6)   | 119.6    |
| C(8)-C(7)-C(6)   | 119.2(4) |

|                   |          |
|-------------------|----------|
| C(8)-C(7)-H(7)    | 120.4    |
| C(6)-C(7)-H(7)    | 120.4    |
| C(7)-C(8)-C(9)    | 121.6(4) |
| C(7)-C(8)-Br(1)   | 119.9(3) |
| C(9)-C(8)-Br(1)   | 118.5(3) |
| C(10)-C(9)-C(8)   | 119.1(4) |
| C(10)-C(9)-H(9)   | 120.4    |
| C(8)-C(9)-H(9)    | 120.4    |
| C(9)-C(10)-C(5)   | 121.6(4) |
| C(9)-C(10)-H(10)  | 119.2    |
| C(5)-C(10)-H(10)  | 119.2    |
| O(3)-C(11)-C(12)  | 103.7(3) |
| O(3)-C(11)-C(1)   | 110.4(3) |
| C(12)-C(11)-C(1)  | 117.0(3) |
| O(3)-C(11)-H(11)  | 108.5    |
| C(12)-C(11)-H(11) | 108.5    |
| C(1)-C(11)-H(11)  | 108.5    |
| C(13)-C(12)-C(11) | 109.4(3) |
| C(13)-C(12)-H(12) | 125.3    |
| C(11)-C(12)-H(12) | 125.3    |
| C(12)-C(13)-C(14) | 110.3(3) |
| C(12)-C(13)-H(13) | 124.9    |

|                   |          |
|-------------------|----------|
| C(14)-C(13)-H(13) | 124.9    |
| O(2)-C(14)-O(3)   | 120.4(3) |
| O(2)-C(14)-C(13)  | 132.4(4) |
| O(3)-C(14)-C(13)  | 107.2(3) |

---

Symmetry transformations used to generate equivalent atoms:

Table 4. Anisotropic displacement parameters ( $\text{Å}^2 \times 10^3$ ) for cd20181.

The anisotropic displacement factor exponent takes the form:

$$-2 \pi^2 [ h^2 a^2 U_{11} + \dots + 2 h k a^* b^* U_{12} ]$$

---

|       | U11    | U22   | U33   | U23    | U13    | U12    |
|-------|--------|-------|-------|--------|--------|--------|
| Br(1) | 141(1) | 65(1) | 42(1) | 2(1)   | 7(1)   | -12(1) |
| O(1)  | 78(2)  | 70(2) | 70(2) | 17(2)  | -1(2)  | 18(2)  |
| O(2)  | 29(1)  | 80(2) | 76(2) | 7(1)   | -2(1)  | 0(2)   |
| O(3)  | 31(1)  | 51(2) | 52(2) | 2(1)   | -5(1)  | 11(1)  |
| C(1)  | 45(2)  | 44(2) | 46(2) | -4(2)  | 3(2)   | 6(2)   |
| C(2)  | 58(2)  | 41(2) | 51(2) | -3(2)  | -10(2) | -2(2)  |
| C(3)  | 72(3)  | 40(2) | 45(2) | -10(2) | -2(2)  | 2(2)   |
| C(4)  | 83(3)  | 71(3) | 70(3) | 9(3)   | 5(2)   | -22(3) |
| C(5)  | 52(2)  | 42(2) | 40(2) | -6(2)  | 2(2)   | 4(2)   |
| C(6)  | 61(3)  | 63(3) | 50(3) | 2(2)   | 0(2)   | 18(2)  |
| C(7)  | 74(3)  | 81(3) | 56(3) | -11(3) | 21(2)  | 2(3)   |
| C(8)  | 92(3)  | 51(2) | 41(2) | -5(2)  | 3(3)   | -7(3)  |

---



|       |       |       |       |        |       |       |
|-------|-------|-------|-------|--------|-------|-------|
| C(9)  | 80(3) | 59(3) | 53(3) | 5(2)   | -6(2) | 21(2) |
| C(10) | 71(3) | 70(3) | 43(2) | 4(2)   | 12(2) | 25(2) |
| C(11) | 33(2) | 51(2) | 38(2) | 1(2)   | -1(1) | 7(2)  |
| C(12) | 34(2) | 61(2) | 50(2) | -11(2) | 3(2)  | 7(2)  |
| C(13) | 43(2) | 44(2) | 69(3) | -5(2)  | -8(2) | 9(2)  |
| C(14) | 39(2) | 56(3) | 39(2) | 0(2)   | -1(2) | 6(2)  |

---

Table 5. Hydrogen coordinates ( $\times 10^4$ ) and isotropic displacement parameters ( $\text{Å}^2 \times 10^3$ ) for cd20181.

---

|       | x     | y     | z    | U(eq) |
|-------|-------|-------|------|-------|
| H(1)  | 9828  | 6957  | 1402 | 54    |
| H(2A) | 6088  | 8490  | 1649 | 60    |
| H(2B) | 6143  | 6978  | 1270 | 60    |
| H(4A) | 4753  | 4849  | 2391 | 112   |
| H(4B) | 3872  | 5275  | 1871 | 112   |
| H(4C) | 3997  | 6718  | 2271 | 112   |
| H(6)  | 11769 | 7697  | 696  | 70    |
| H(7)  | 11911 | 8827  | -90  | 84    |
| H(9)  | 6525  | 11054 | 111  | 77    |
| H(10) | 6442  | 10064 | 900  | 73    |
| H(11) | 9670  | 8754  | 2102 | 49    |
| H(12) | 7741  | 11352 | 1805 | 58    |
| H(13) | 10490 | 13285 | 1700 | 62    |

---



Table 6. Torsion angles [deg] for cd20181.

---

|                       |           |
|-----------------------|-----------|
| C(5)-C(1)-C(2)-C(3)   | 158.6(3)  |
| C(11)-C(1)-C(2)-C(3)  | -75.3(4)  |
| C(1)-C(2)-C(3)-O(1)   | -4.0(5)   |
| C(1)-C(2)-C(3)-C(4)   | 176.9(3)  |
| C(11)-C(1)-C(5)-C(6)  | 91.8(4)   |
| C(2)-C(1)-C(5)-C(6)   | -143.3(3) |
| C(11)-C(1)-C(5)-C(10) | -86.4(4)  |
| C(2)-C(1)-C(5)-C(10)  | 38.5(5)   |
| C(10)-C(5)-C(6)-C(7)  | -1.0(5)   |
| C(1)-C(5)-C(6)-C(7)   | -179.3(4) |
| C(5)-C(6)-C(7)-C(8)   | 0.2(6)    |
| C(6)-C(7)-C(8)-C(9)   | -1.1(6)   |
| C(6)-C(7)-C(8)-Br(1)  | -179.6(3) |
| C(7)-C(8)-C(9)-C(10)  | 2.8(6)    |
| Br(1)-C(8)-C(9)-C(10) | -178.7(3) |
| C(8)-C(9)-C(10)-C(5)  | -3.6(6)   |
| C(6)-C(5)-C(10)-C(9)  | 2.7(6)    |
| C(1)-C(5)-C(10)-C(9)  | -179.0(4) |

|                         |           |
|-------------------------|-----------|
| C(14)-O(3)-C(11)-C(12)  | 2.2(4)    |
| C(14)-O(3)-C(11)-C(1)   | 128.3(3)  |
| C(5)-C(1)-C(11)-O(3)    | -66.6(4)  |
| C(2)-C(1)-C(11)-O(3)    | 166.9(3)  |
| C(5)-C(1)-C(11)-C(12)   | 51.6(4)   |
| C(2)-C(1)-C(11)-C(12)   | -74.9(4)  |
| O(3)-C(11)-C(12)-C(13)  | -1.5(4)   |
| C(1)-C(11)-C(12)-C(13)  | -123.3(3) |
| C(11)-C(12)-C(13)-C(14) | 0.3(4)    |
| C(11)-O(3)-C(14)-O(2)   | 177.9(3)  |
| C(11)-O(3)-C(14)-C(13)  | -2.1(4)   |
| C(12)-C(13)-C(14)-O(2)  | -178.8(4) |
| C(12)-C(13)-C(14)-O(3)  | 1.1(4)    |

---

Symmetry transformations used to generate equivalent atoms:

Table 7. Hydrogen bonds for cd20181 [A and deg.].

---

| D-H...A | d(D-H) | d(H...A) | d(D...A) | <(DHA) |
|---------|--------|----------|----------|--------|
|---------|--------|----------|----------|--------|

## H: References

<sup>1</sup> Fukuyama, T.; Cheung, M.; Kan, T. *synlett.* **1999**, 8, 1301-1303.
